# Supplementary material for: Systematic synthetic study of four diastereomerically distinct limonene-1,2-diols and their corresponding cyclic carbonates
Source: publisher site journal article supplement (doi:10.3762/bjoc.15.13), 2019-01-14
Supplement: Additional file 1 [file 1860-5397-15-13-S1.pdf]

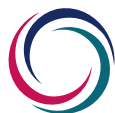

## Supporting Information

for

### **Systematic synthetic study of four diastereomerically distinct limonene-1,2-diols and their corresponding cyclic carbonates**

Hiroshi Morikawa, Jun-ichi Yamaguchi, Shun-ichi Sugimura, Masato Minamoto,  
Yuuta Gorou, Hisatoyo Morinaga and Suguru Motokucho

*Beilstein J. Org. Chem.* **2019**, *15*, 130–136. [doi:10.3762/bjoc.15.13](https://doi.org/10.3762/bjoc.15.13)

### **Experimental, synthesis, and NMR and FTIR spectra of all the compounds**

## Table of contents

|                                                                                               |         |
|-----------------------------------------------------------------------------------------------|---------|
| <b>1. General</b> .....                                                                       | S3      |
| <b>2. Synthesis</b> .....                                                                     | S4–S10  |
| <b>3. Characteristic data (Tables S1 and S2)</b> .....                                        | S11     |
| <b>4. NMR Spectra</b>                                                                         |         |
| For <b>1a</b>                                                                                 |         |
| <sup>1</sup> H NMR spectrum.....                                                              | S12     |
| <sup>13</sup> C and DEPT135 spectra.....                                                      | S13     |
| HETCOR spectra.....                                                                           | S14     |
| <sup>1</sup> H- <sup>1</sup> H COSY spectra.....                                              | S15–S16 |
| For <b>1b</b>                                                                                 |         |
| <sup>1</sup> H NMR spectrum.....                                                              | S17     |
| <sup>13</sup> C and DEPT135 spectra.....                                                      | S18     |
| HETCOR spectra.....                                                                           | S19     |
| <sup>1</sup> H- <sup>1</sup> H COSY spectra.....                                              | S20–S21 |
| For <b>1c</b>                                                                                 |         |
| <sup>1</sup> H NMR spectrum.....                                                              | S22     |
| <sup>13</sup> C and DEPT135 spectra.....                                                      | S23     |
| HETCOR spectra.....                                                                           | S24     |
| <sup>1</sup> H- <sup>1</sup> H COSY spectra.....                                              | S25–S26 |
| For <b>1d</b>                                                                                 |         |
| <sup>1</sup> H NMR spectrum.....                                                              | S27     |
| <sup>13</sup> C and DEPT135 spectra.....                                                      | S28     |
| HETCOR spectra.....                                                                           | S29     |
| <sup>1</sup> H- <sup>1</sup> H COSY spectra.....                                              | S30–S31 |
| For comparison among <b>1a–1d</b>                                                             |         |
| <sup>1</sup> H NMR spectra.....                                                               | S32     |
| <sup>13</sup> C NMR spectra .....                                                             | S33     |
| For <b>2a</b>                                                                                 |         |
| <sup>1</sup> H NMR spectrum.....                                                              | S34     |
| <sup>13</sup> C and DEPT135 spectra.....                                                      | S35     |
| HETCOR spectra.....                                                                           | S36     |
| <sup>1</sup> H- <sup>1</sup> H COSY spectra.....                                              | S37–S38 |
| HMBC spectra.....                                                                             | S39     |
| 1,1-ADEQUATE spectrum.....                                                                    | S40     |
| For <b>2b</b>                                                                                 |         |
| <sup>1</sup> H NMR spectrum.....                                                              | S41     |
| <sup>1</sup> H NMR spectra (in benzene- <i>d</i> <sub>6</sub> and in CD <sub>3</sub> OD)..... | S42     |
| <sup>13</sup> C and DEPT135 spectra.....                                                      | S43     |
| HETCOR spectra.....                                                                           | S44     |
| <sup>1</sup> H- <sup>1</sup> H COSY spectra.....                                              | S45–S46 |
| HMBC spectra.....                                                                             | S47     |
| 1,1-ADEQUATE spectrum.....                                                                    | S48     |
| For <b>2c</b>                                                                                 |         |
| <sup>1</sup> H NMR spectrum.....                                                              | S49     |
| <sup>13</sup> C and DEPT135 spectra.....                                                      | S50     |
| HETCOR spectra.....                                                                           | S51     |
| <sup>1</sup> H- <sup>1</sup> H COSY spectra.....                                              | S52–S53 |
| HMBC spectra.....                                                                             | S54     |
| For <b>2d</b>                                                                                 |         |
| <sup>1</sup> H NMR spectrum.....                                                              | S55     |
| <sup>13</sup> C and DEPT135 spectra.....                                                      | S56     |
| HETCOR spectra.....                                                                           | S57     |

|                                                  |                |
|--------------------------------------------------|----------------|
| <sup>1</sup> H- <sup>1</sup> H COSY spectra..... | S58–S59        |
| HMBC spectra.....                                | S60            |
| For comparison among <b>2a–2d</b>                |                |
| <sup>1</sup> H NMR spectra.....                  | S61            |
| <sup>13</sup> C NMR spectra .....                | S62            |
| <b>5. FTIR spectra .....</b>                     | <b>S63–S65</b> |
| <b>6. GC chart (typical example) .....</b>       | <b>S66–S68</b> |
| <b>7. References .....</b>                       | <b>S69</b>     |

## 1. General

(*R*)-Limonene oxide (LO) comprising a mixture of *cis*- and *trans*-isomers (43:57) was purchased from Wako (Osaka, Japan) and was used as received. Pure *trans*-LO (>99% de) and *cis*-LO (96% de) were individually prepared from the LO mixture [1]. Triphosgene (TCI, Japan), tetrabutylammonium chloride (TBAC, TCI, Japan) and lithium aluminium hydride (LAH, Wako, Japan) were used as received. Carbon dioxide was used as dry-ice. Pyridine, diethyl ether and CH<sub>2</sub>Cl<sub>2</sub> were dried by distillation over CaH<sub>2</sub>, CaH<sub>2</sub> and P<sub>2</sub>O<sub>5</sub>, respectively. All other reagents and solvents were reagent grade and used as received. Syntheses of **1a**, **1d** and **2d** were performed in a similar manner to the previous study [2].

<sup>1</sup>H and <sup>13</sup>C NMR spectra (400 MHz <sup>1</sup>H; 100 MHz <sup>13</sup>C), DEPT 135 and two-dimensional NMR spectra (<sup>1</sup>H-<sup>1</sup>H COSY, HETCOR, HMBC) were recorded on a JEOL JNM-ECA 400 spectrometer at room temperature. The solvents were CDCl<sub>3</sub> except for **2b** in CD<sub>3</sub>OD or in benzene-*d*<sub>6</sub> in Supporting Information page S42. The concentration was adjusted to 5–15 mg mL<sup>-1</sup> dependent on the measurements. Chemical shifts were determined using tetramethylsilane as an internal standard. All the chemical shift values (ppm) in <sup>13</sup>C NMR analyses of the LM5CCs and LMdiols are listed in Tables 1 and 2. 1,1-ADEQUATE spectra were measured at the Office for Research Initiative and Development / Common Facilities Division in Nagasaki University by a Varian NMR System 500 at 24 °C in CDCl<sub>3</sub>, and operated using VnmrJ 4.2 Rev. A software. The concentration was adjusted to approximately 100 mg mL<sup>-1</sup>.

FTIR spectra were recorded on a JASCO FTIR 460 spectrometer, and the transmission spectra were measured from KBr discs. High-resolution mass spectra (HRMS) were recorded using a JEOL JMS-700N instrument using electron ionisation

(EI) mass spectrometry, and measured at the Office for Research Initiative and Development / Common Facilities Division in Nagasaki University. Melting point (mp) was measured on a YANAKO MP-500D hot-stage apparatus. Optical rotations were measured in a 100 mm length cell on a JASCO Model P-2200 digital polarimeter at 25 °C, and an average value from ten measurements was calculated. Gas chromatography (GC) analysis was performed on a SHIMADZU GC2014. The injector and detector temperatures were set at 230 and 350 °C, respectively, The temperature of column (Rxi-5Sil MS column, GL Sciences Inc., Japan) was initially at 100 °C for 1min, then raised to 330 °C at 20 °C /min, and finally hold at 330 °C. Kovats retention index of each compound was estimated according to the literature [3] as references to mixed hydrocarbon standards (C9–C40) in *n*-hexane (GL Sciences Inc., Japan).

Thin-layer chromatography (TLC) was performed using GF254 silica gel plates (Merck). Acidic *p*-anisaldehyde was used for TLC visualisation.

## 2. Synthesis

### Synthesis of carbonate **1a** from *trans*-LO

Conditions (a) in Scheme 3

LM5CC **1a** was synthesised by a modification of the procedure from our previous report [2]. Briefly, a mixture of pure *trans*-LO (762 mg, 5.01 mmol), TBAC (140 mg, 0.504 mmol), and dry-ice was heated in a autoclave (Type TVS-N2, Taiatsu Glass Kogyo Co., Japan) with stirring at 100 °C for 72 h under 5 MPa CO<sub>2</sub>. After carbonation, the reaction mixture was purified using SiO<sub>2</sub> column chromatography (*n*-hexane/ethyl acetate (10:1, v/v) as an eluent) to afford **1a** (829 mg, 4.23 mmol) as a white solid in an 84% yield. Though the mp and <sup>1</sup>H and <sup>13</sup>C NMR were measured

previously [2], their measurements were re-performed in this study for more detail characterization.

**1a** [2,4,5]: mp 35–37 °C (lit [2]; 37–38 °C); <sup>1</sup>H NMR (CDCl<sub>3</sub>) δ 4.76 (q, *J* = 1.4 Hz, 1H), 4.72 (s, 1H), 4.37 (dd, *J* = 9.6 and 6.9 Hz, 1H), 2.31 (ddd, *J* = 15.5, 3.7 and 3.7 Hz, 1H), 2.28–2.22 (m, 1H), 1.92 (dddd, *J* = 11.9, 11.9, 3.2 and 3.2 Hz, 1H), 1.72 (s, 3H), 1.71–1.59 (m, 2H), 1.51–1.40 (m, 2H), 1.47 (s, 3H). The IR, HRMS data and the optical rotation value were reported previously [2].

### Synthesis of carbonate **1d** from *cis*-LO

Conditions (a) in Scheme 3

In a similar manner to that used for **1a**, **1d** [2] was synthesised from a mixture of pure *cis*-LO (766 mg, 5.03 mmol), TBAC (136 mg, 4.89 mmol) and dry-ice, which was reacted under 5 MPa CO<sub>2</sub> at 100 °C for 72 h. The carbonate **1d** (301 mg, 1.53 mmol) was obtained as a white solid in a 30% yield following SiO<sub>2</sub> column chromatography (*n*-hexane/ethyl acetate (10:1, v/v) as an eluent). Though the mp and <sup>1</sup>H and <sup>13</sup>C NMR were measured previously [2], their measurements were re-performed in this study for more detail characterization.

**1d**[2]: mp 40–41 °C(lit [2]; 40–41 °C); <sup>1</sup>H NMR (CDCl<sub>3</sub>) δ 4.78 (q, *J* = 1.4 Hz, 1H), 4.72 (m, 1H), 4.44 (dd, *J* = 3.2 and 2.3 Hz, 1H), 2.31–2.22 (m, 2H), 2.01 (ddd, *J* = 13.3, 4.6 and 4.1 Hz, 1H), 1.88–1.79 (m, 2H), 1.74 (s, 3H), 1.56 (ddd, *J* = 14.3, 13.3 and 3.6 Hz, 1H), 1.51 (s, 3H), 1.25–1.15 (m, 1H). The IR, HRMS data and the optical rotation value were reported previously [2].

### Synthesis of carbonate **1a** from diol **2a**

Conditions (c) in Scheme 3

In a 100 mL round-bottomed flask, **2a** (341.7 mg, 2.007 mmol) and dry pyridine (652.9 mg, 8.254 mmol) were dissolved in dry CH<sub>2</sub>Cl<sub>2</sub> (18 mL). Triphosgene (289.7 mg, 0.9763 mmol) in dry CH<sub>2</sub>Cl<sub>2</sub> (2 mL) was added to the solution under cooling in an ice bath. After stirring at room temperature for 2 h under N<sub>2</sub> atmosphere, the consumption of **2a** was confirmed by TLC. Then, water (20 mL) was added to the solution. The organic layer was separated and washed with saturated aqueous NH<sub>4</sub>Cl solution. The organic layer was collected, dried over anhydrous MgSO<sub>4</sub> and filtered. After evaporation, the crude product was purified by SiO<sub>2</sub> column chromatography eluted with *n*-hexane/ethyl acetate (10:1, v/v) to obtain **1a** (370.5 mg, 1.888 mmol) in a 94% yield. The spectroscopic data were identical to those of an authentic sample prepared from *trans*-LO and CO<sub>2</sub>.

#### **Synthesis of carbonate 1d from diol 2d**

Conditions (c) in Scheme 3

LM5CC **1d** was synthesised in a similar manner to that used to prepare **1a** from **2a** and triphosgene. From **2d** (346.8 mg, 2.037 mmol) and triphosgene (286.0 mg, 0.9638 mmol), **1d** (374.5 mg, 1.908 mmol) was obtained as a white solid in a 94% yield. The spectroscopic data were identical to those of the authentic sample prepared from *cis*-LO and CO<sub>2</sub>.

#### **Synthesis of carbonate 1b from diol 2b**

Conditions (c) in Scheme 3

LM5CC **1b** was synthesised in a similar manner to **1a**. From **2b** (340.5 mg, 2.000 mmol) and triphosgene (623.6 mg, 2.102 mmol), **1b** (96.1 mg, 0.489 mmol) was obtained as a white solid in a 24% yield.

**1b**: mp 35–36 °C; IR (KBr)  $\nu_{\text{C=O}}$  1805  $\text{cm}^{-1}$ ;  $^1\text{H NMR}$  ( $\text{CDCl}_3$ )  $\delta$  4.98 (bs, 1H), 4.89 (s, 1H), 4.37 (dd,  $J = 13.7$  and  $3.7$  Hz, 1H), 2.61 (t,  $J = 5.0$  Hz, 1H), 2.30 (ddd,  $J = 12.4$ , 1.8 and 1.8 Hz, 1H), 2.17–2.12 (m, 1H) 2.13–2.03 (m, 1H), 1.98–1.95 (m, 1H), 1.89 (ddd,  $J = 12.8$ , 12.8 and 6.0 Hz, 1H), 1.79 (s, 3H), 1.77–1.71 (m, 1H), 1.41 (s, 3H); HRMS (EI,  $m/z$ )  $[\text{M}]^+$  Calcd. for  $\text{C}_{11}\text{H}_{16}\text{O}_3$ , 196.1099; found, 196.1099;  $[\alpha]_{\text{D}}^{25} = -25.4$  ( $c$  1.00,  $\text{CHCl}_3$ ).

### Synthesis of carbonate **1c** from diol **2c**

Conditions (c) in Scheme 3

LM5CC **1c** was synthesised in a similar manner to **1a**. From **2c** (341.3 mg, 2.004 mmol) and triphosgene (609.0 mg, 2.053 mmol), **1c** (227.3 mg, 1.158 mmol) was obtained as a white solid in a 58% yield.

**1c**: mp 34–36 °C; IR (KBr)  $\nu_{\text{C=O}}$  1806  $\text{cm}^{-1}$ ;  $^1\text{H NMR}$  ( $\text{CDCl}_3$ )  $\delta$  4.80 (q,  $J = 1.4$  Hz, 1H), 4.78 (s, 1H), 4.17 (dd,  $J = 12.8$  and  $3.7$  Hz, 1H), 2.28 (dddd,  $J = 12.4$ , 11.9, 4.6 and 4.1 Hz, 1H), 2.20 (ddd,  $J = 11.9$ , 3.7 and 3.2 Hz, 1H), 2.11–2.06 (m, 1H), 1.96–1.85 (m, 2H), 1.76 (s, 3H), 1.75 (ddd,  $J = 12.8$ , 11.9 and 11.9 Hz, 1H), 1.55–1.45 (m, 1H), 1.38 (s, 3H); HRMS (EI,  $m/z$ )  $[\text{M}]^+$  Calcd. for  $\text{C}_{11}\text{H}_{16}\text{O}_3$ , 196.1099; found, 196.1092;  $[\alpha]_{\text{D}}^{25} = +3.3$  ( $c$  1.00,  $\text{CHCl}_3$ ).

### Synthesis of diol **2a** from carbonate **1a**

Conditions (b) in Scheme 3

In a 200-mL round-bottomed flask, **1a** (2.0177 g, 10.28 mmol) was dissolved in dry diethyl ether (40 mL) under  $\text{N}_2$  atmosphere. The flask was immersed into an ice bath and LAH (726.7 mg, 19.14 mmol) was added portionwise with cooling. After stirring for 2 h at room temperature, the consumption of **1a** was confirmed by TLC. Then, ethyl acetate (100 mL) and brine (100 mL) were carefully added to the mixture. The



organic layer was separated, dried over anhydrous  $\text{MgSO}_4$ , and filtered. After evaporation and purification using  $\text{SiO}_2$  column chromatography (*n*-hexane/ethyl acetate, 1:5, v/v), **2a** (1.6135 g, 9.4773 mmol) was obtained as a white solid in a 92% yield.

**2a**: mp 75 °C; IR (KBr)  $\nu_{\text{OH}}$  3348,  $\nu_{\text{C-H}}$  2933, 2860  $\text{cm}^{-1}$ ;  $^1\text{H}$  NMR ( $\text{CDCl}_3$ )  $\delta$  4.71–4.69 (m, 2H), 3.41(dd,  $J = 11.4$  and 4.6 Hz, 1H), 1.96 (dddd,  $J = 12.4, 11.9, 3.2$  and 3.2Hz, 1H), 1.84 (ddd,  $J = 13.7, 3.2$  and 3.2 Hz, 1H), 1.79 (ddd,  $J = 12.4, 3.3$  and 3.2 Hz, 1H), 1.73 (s, 3H), 1.54–1.48 (m, 3H), 1.42–1.34 (m, 1H), 1.27 (s, 3H); HRMS (EI,  $m/z$ )  $[\text{M}]^+$  Calcd. for  $\text{C}_{10}\text{H}_{18}\text{O}_2$ , 170.1307; found, 170.1307;  $[\alpha]_{\text{D}}^{25} = +4.8$  ( $c$  1.00,  $\text{CHCl}_3$ ).

### Synthesis of diol **2b** from carbonate **1b**

Conditions (b) in Scheme 3

Diol **2b** was synthesised in a similar manner to **2a**. Carbonate **1b** (103.3 mg, 0.5264 mmol) and LAH (41.2 mg, 1.09 mmol) were reacted to obtain **2b** (75.5 mg, 0.443 mmol) as a white solid in an 84% yield. The spectroscopic data were identical to those of a sample prepared from *cis*-LO and water.

**2b**: mp 72–73 °C (lit [6]; 69–71 °C, lit [7]; 68–70 °C); IR (KBr)  $\nu_{\text{OH}}$  3330,  $\nu_{\text{C-H}}$  2938, 2869  $\text{cm}^{-1}$ ;  $^1\text{H}$  NMR ( $\text{CDCl}_3$ )  $\delta$  4.73 (s, 2H), 3.63 (t,  $J = 3.2$  Hz, 1H), 2.26 (ddd,  $J = 11.8, 4.2$  and 3.2Hz, 1H), 1.93 (ddd  $J = 13.7, 4.2$  and 4.2 Hz, 1H), 1.78–1.72 (m, 1H), 1.73 (s, 3H), 1.66 (ddd,  $J = 13.7, 4.2$  and 3.2 Hz, 1H), 1.60–1.50 (m, 3H), 1.26 (s, 3H); HRMS (EI,  $m/z$ )  $[\text{M}]^+$  Calcd. for  $\text{C}_{10}\text{H}_{18}\text{O}_2$ , 170.1307; found, 170.1302;  $[\alpha]_{\text{D}}^{25} = +25.8$  ( $c$  1.00,  $\text{CHCl}_3$ ), (lit [6];  $[\alpha]_{\text{D}}^{18} = +27.2$  ( $c$  0.49,  $\text{CHCl}_3$ ), lit [7];  $[\alpha]_{\text{D}}^{20} = +18.1$  ( $c$  0.01,  $\text{CHCl}_3$ )).

### Synthesis of diol **2c** from carbonate **1c**

Conditions (b) in Scheme 3

Diol **2c** was synthesised in a similar manner to **2a**. From **1c** (149.3 mg, 0.7608 mmol) and LAH (58.6 mg, 1.54 mmol), **2c** (122.4 mg, 0.7189 mmol) was obtained as a white solid in a 94% yield. The spectroscopic data were identical to those of a sample prepared from *trans*-LO and water.

**2c**: mp 73–74 °C (lit [7]; 74–76 °C, lit [8]; 71–73 °C); IR (KBr)  $\nu_{\text{OH}}$  3363,  $\nu_{\text{C-H}}$  2936, 2864  $\text{cm}^{-1}$ ;  $^1\text{H}$  NMR ( $\text{CDCl}_3$ )  $\delta$  4.71 (s, 2H), 3.58 (dd,  $J = 11.4$  and  $4.1$  Hz, 1H), 2.07 (dddd,  $J = 12.4, 12.4, 3.7$  and  $3.7$  Hz, 1H), 1.95–1.89 (m, 1H), 1.80 (ddd,  $J = 12.8, 3.2$  and  $3.2$  Hz, 1H), 1.73(s, 3H), 1.73–1.69 (m, 1H), 1.49 (ddd,  $J = 13.7, 12.8$  and  $4.6$  Hz, 1H), 1.36–1.24 (m, 2H), 1.21 (s, 3H); HRMS (EI,  $m/z$ )  $[\text{M}]^+$  Calcd. for  $\text{C}_{10}\text{H}_{18}\text{O}_2$ , 170.1307; found, 170.1311;  $[\alpha]_{\text{D}}^{25} = -5.0$  ( $c$  1.00,  $\text{CHCl}_3$ ), (lit[7];  $[\alpha]_{\text{D}}^{20} = -5.5$  ( $c$  0.01,  $\text{CHCl}_3$ ), lit [8];  $[\alpha]_{\text{D}}^{20} = -6.6$  ( $c$  1.099,  $\text{CHCl}_3$ )).

### Synthesis of diol **2d** from carbonate **1d**

Conditions (b) in Scheme 3

The synthesis was reported previously in ref.[2]. Though the mp and  $^1\text{H}$  and  $^{13}\text{C}$  NMR were measured previously [2], their measurements were re-performed in this study for more detail characterization.

**2d**[2]: mp 46–47 °C (lit [2]; 48–49 °C);  $^1\text{H}$  NMR ( $\text{CDCl}_3$ )  $\delta$  4.72 (m, 1H), 4.71 (m, 1H), 3.66 (t,  $J = 3.5\text{Hz}$ , 1H), 2.35 (dddd,  $J = 11.9, 11.9, 3.7$  and  $3.7$  Hz, 1H), 1.93–1.88 (m, 1H), 1.87–1.80 (m, 1H), 1.72 (s, 3H), 1.74–1.68 (m, 1H), 1.58–1.51 (m, 2H), 1.30 (dddd,  $J = 13.3, 13.3, 11.9$  and  $3.7$  Hz, 1H), 1.25 (s, 3H). The IR, HRMS data and the optical rotation value were reported previously [2].

### Synthesis of diol **2b** from *cis*-LO

Conditions (e) in Scheme 3

A mixture of pure *cis*-LO (465.4 mg, 3.057 mmol) and water (2.66 g, 148 mmol) in a 15 mL test tube was stirred at 90 ° C for 12 h. After cooling to ambient temperature, a white precipitate appeared and was collected by filtration (203.9 mg). The filtrate was extracted with diethyl ether (10 mL) twice. The organic layer was isolated and dried over anhydrous MgSO<sub>4</sub>. After evaporation, the residue was purified using SiO<sub>2</sub> column chromatography (*n*-hexane/ethyl acetate, 2:1, v/v) to obtain a white solid (161.5 mg). This solid was combined with the filtered solid to obtain **2b** (365.4 mg, 2.146 mmol) as a white solid in a 70% yield overall.

### Synthesis of diol **2c** from *trans*-LO

Conditions (d) in Scheme 3

A mixture of pure *trans*-LO (468.2 mg, 3.076 mmol), water (1.34 g, 74.4 mmol) and 1,4-dioxane (1.34 mL) was sealed in a 10 mL pressure-resistant glass tube. This mixture was stirred at 120 °C for 72 h. After cooling, the pressure was released. Brine (10 mL) was added to the mixture, and it was extracted twice with ethyl acetate (15 mL). The organic layer was isolated and dried over anhydrous MgSO<sub>4</sub>. The filtrate was evaporated and the residue was purified using SiO<sub>2</sub> column chromatography (*n*-hexane/ethyl acetate, 1:1, v/v). The diol **2c** (97.4 mg, 0.572 mmol) was isolated as a white solid in a 19% yield along with **2b** (305.0 mg, 58%).

### 3. Characteristic data

Some data have been already shown in the aforementioned experimental section of this Supporting Information and cited from ref.[2].

**Table S1:** Characteristic data of LM5CCs, **1a–d**

|                                                                                                   | compounds          |           |           |                    |
|---------------------------------------------------------------------------------------------------|--------------------|-----------|-----------|--------------------|
|                                                                                                   | <b>1a</b>          | <b>1b</b> | <b>1c</b> | <b>1d</b>          |
| Melting point (°C)                                                                                | 35–37              | 35–36     | 34–36     | 40–41              |
| IR absorption band (KBr)<br>$\nu_{C=O}$ (cm <sup>-1</sup> )                                       | 1794 <sup>c</sup>  | 1805      | 1806      | 1807 <sup>c</sup>  |
| specific rotation<br>[ $\alpha$ ] <sub>D</sub> <sup>25</sup> ( <i>c</i> 1.00, CHCl <sub>3</sub> ) | +53.7 <sup>c</sup> | -25.4     | +3.3      | -15.8 <sup>c</sup> |
| $R_f$ on TLC <sup>a</sup>                                                                         | 0.35               | 0.35      | 0.35      | 0.35               |
| Kovats retention index <sup>b</sup>                                                               | 1618               | 1699      | 1665      | 1620               |

<sup>a</sup>developing with *n*-hexane/ethyl acetate = 5/1 (*v/v*). <sup>b</sup>determined by GC using hydrocarbon standards as reference samples. <sup>c</sup>cited from ref.[2]

**Table S2:** Characteristic data of LMdiols, **2a–d**

|                                                                                                   | compounds |           |           |                    |
|---------------------------------------------------------------------------------------------------|-----------|-----------|-----------|--------------------|
|                                                                                                   | <b>2a</b> | <b>2b</b> | <b>2c</b> | <b>2d</b>          |
| Melting point (°C)                                                                                | 75        | 72–73     | 73–74     | 46–47              |
| IR absorption band (KBr)<br>$\nu_{OH}$ (cm <sup>-1</sup> )                                        | 3348      | 3330      | 3363      | 3322 <sup>c</sup>  |
| specific rotation<br>[ $\alpha$ ] <sub>D</sub> <sup>25</sup> ( <i>c</i> 1.00, CHCl <sub>3</sub> ) | +4.8      | +25.8     | -5.0      | +28.3 <sup>c</sup> |
| $R_f$ on TLC <sup>a</sup>                                                                         | 0.40      | 0.40      | 0.20      | 0.35               |
| Kovats retention index <sup>b</sup>                                                               | 1348      | 1363      | 1373      | 1359               |

<sup>a</sup>developing with *n*-hexane/ethyl acetate = 1/1 (*v/v*). <sup>b</sup>determined by GC using hydrocarbon standards as reference samples. <sup>c</sup>cited from ref.[2]

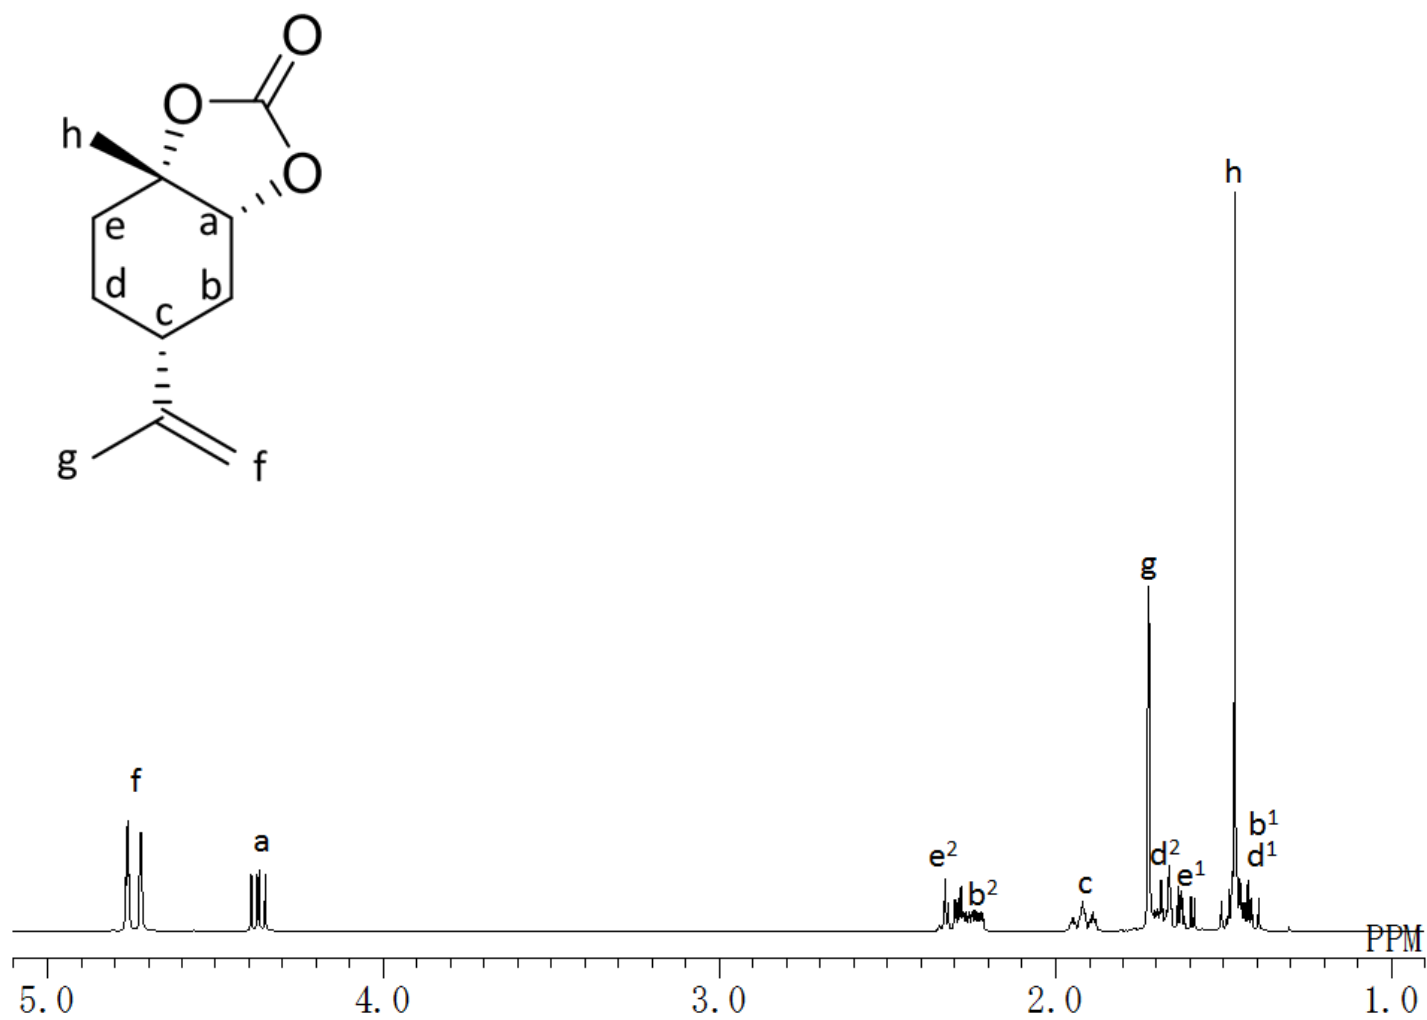

$^1\text{H}$  NMR spectrum of **1a** in  $\text{CDCl}_3$ .

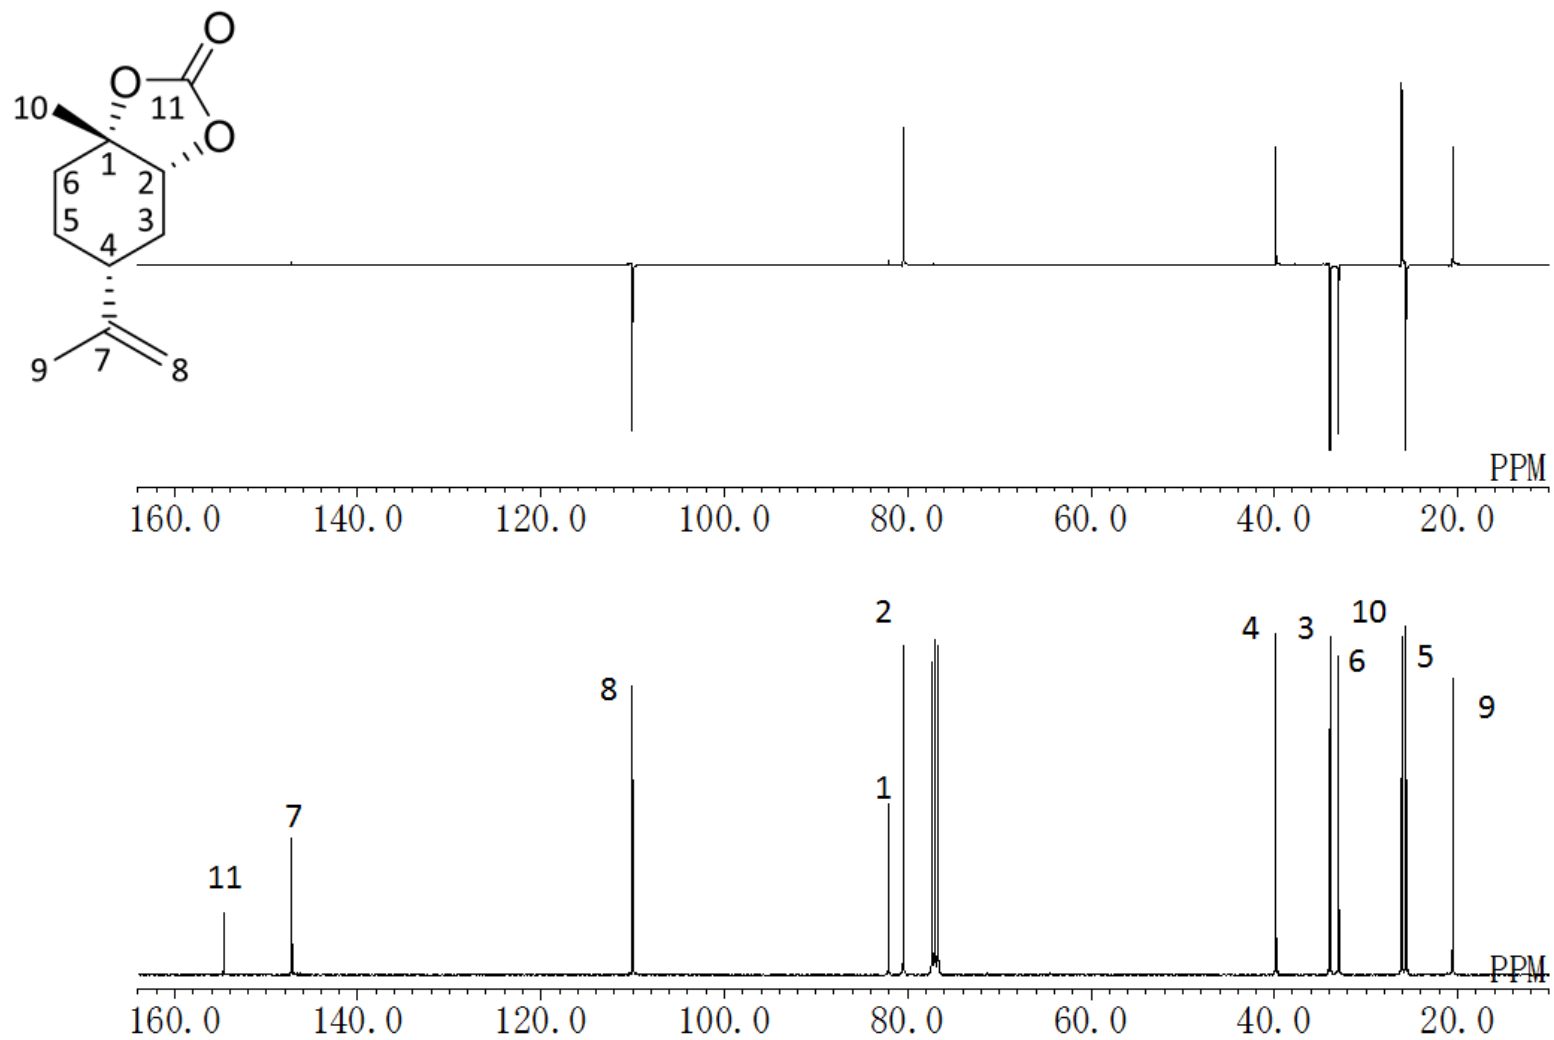

(top) DEPT135 and (bottom) <sup>13</sup>C NMR spectra of **1a** in CDCl<sub>3</sub>.

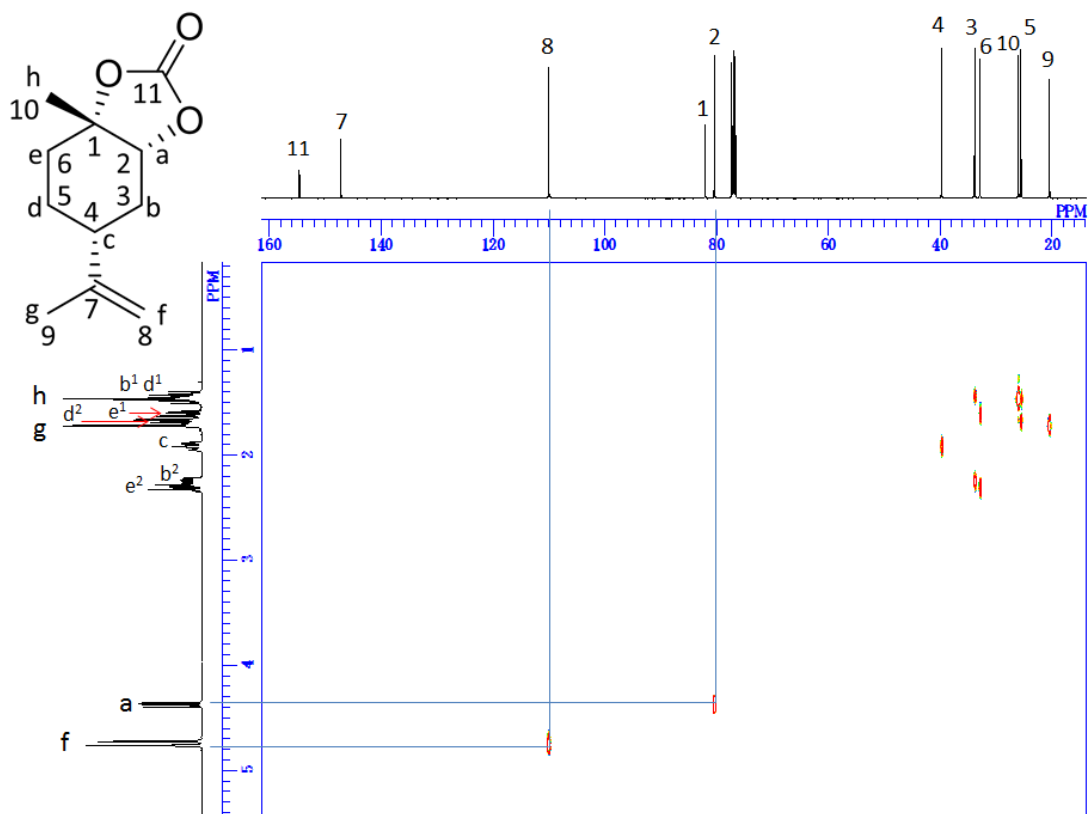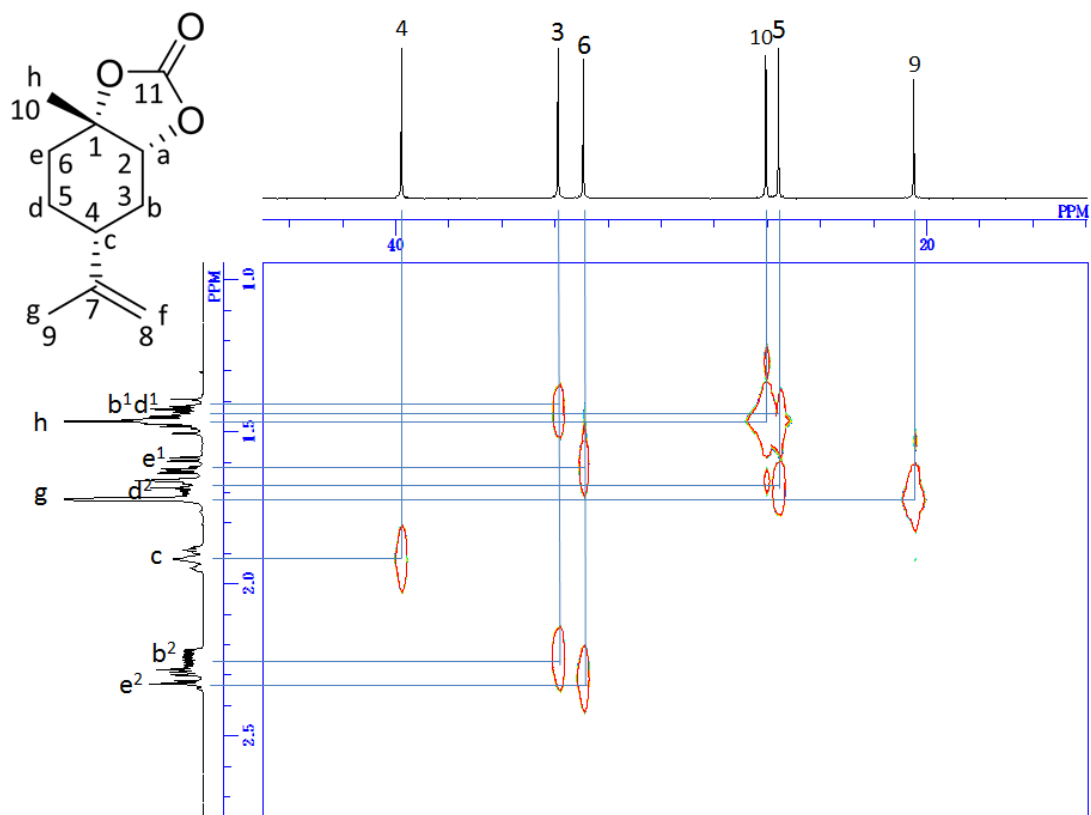

HETCOR spectra of **1a** in CDCl<sub>3</sub>; (top) full range and (bottom) selected range.

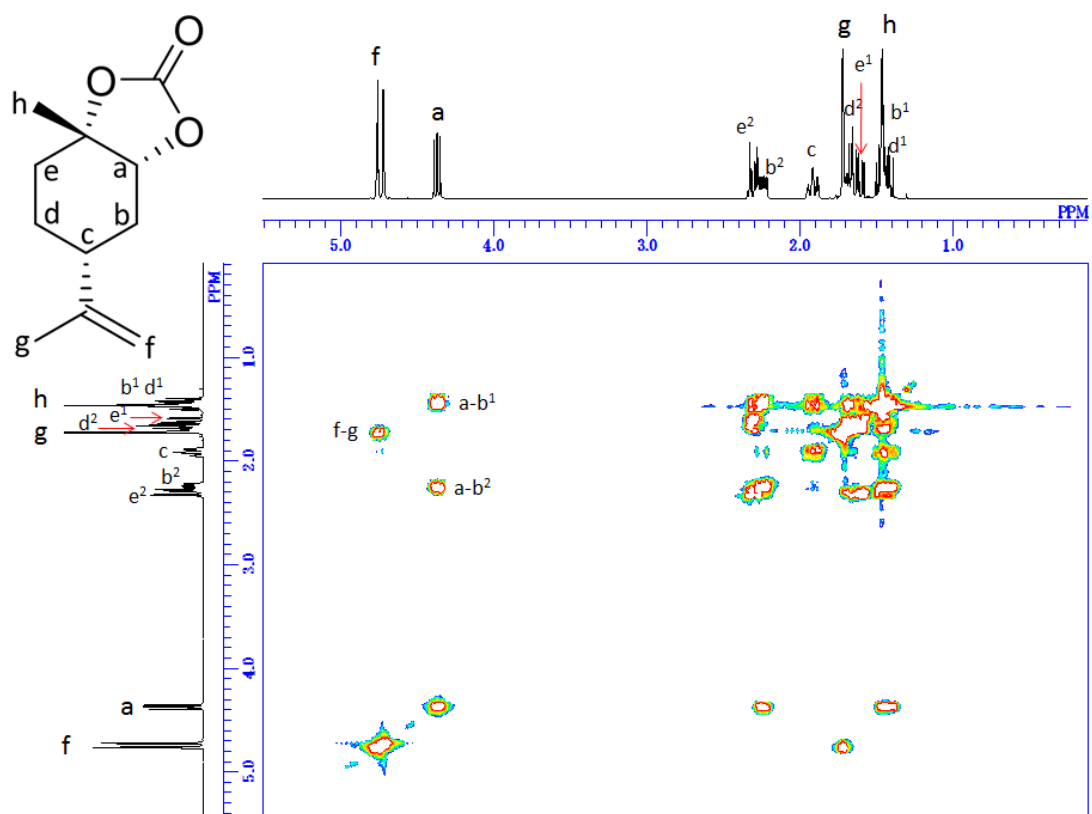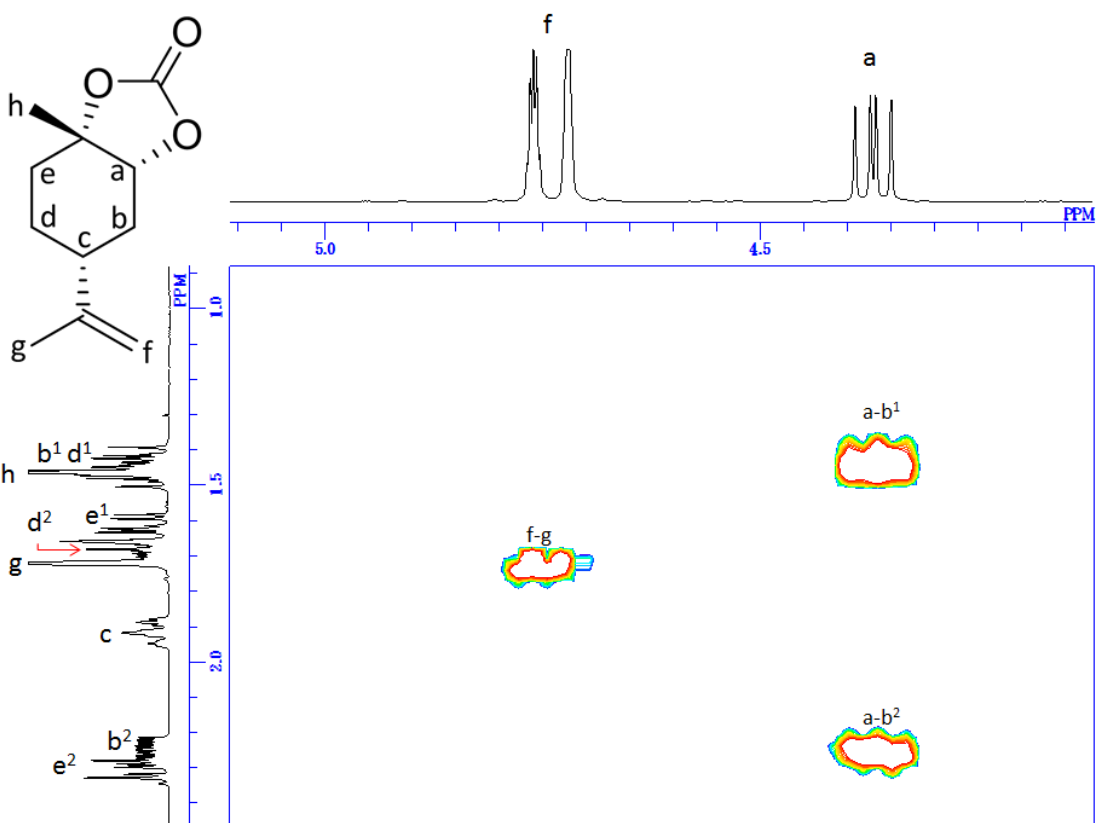

$^1\text{H}$ - $^1\text{H}$  COSY spectra of **1a** in  $\text{CDCl}_3$ ; (top) full range and (bottom) selected range.



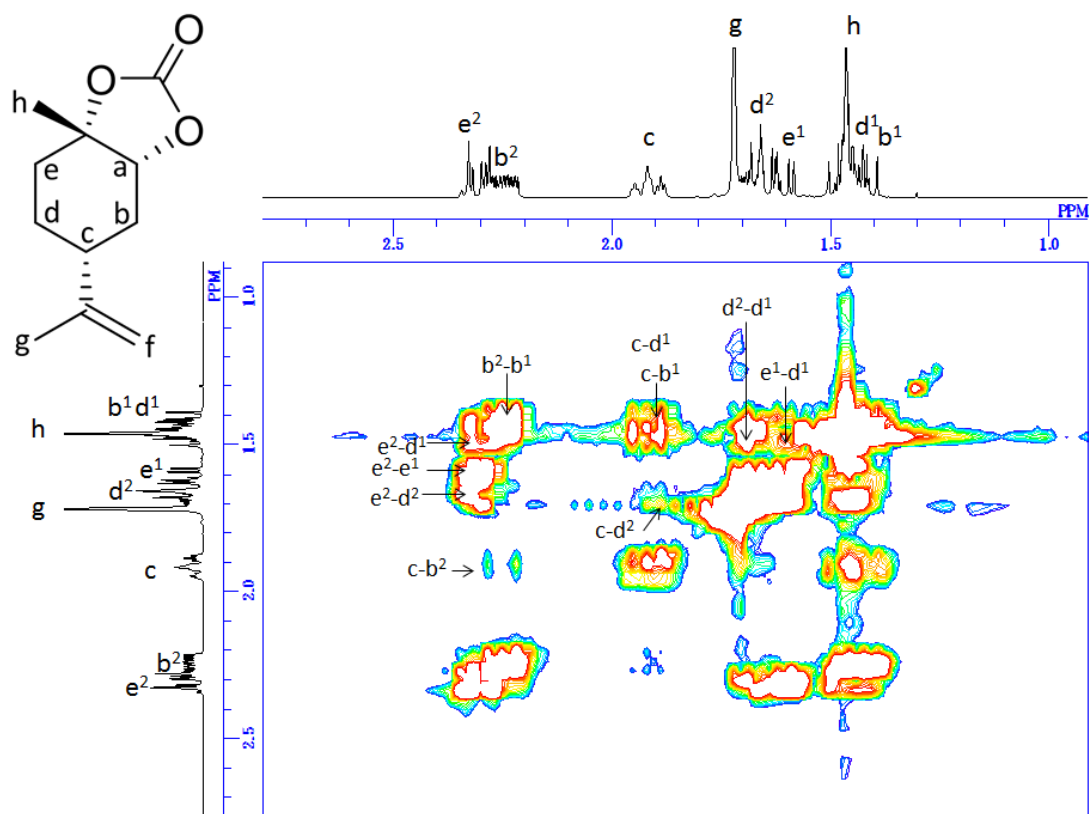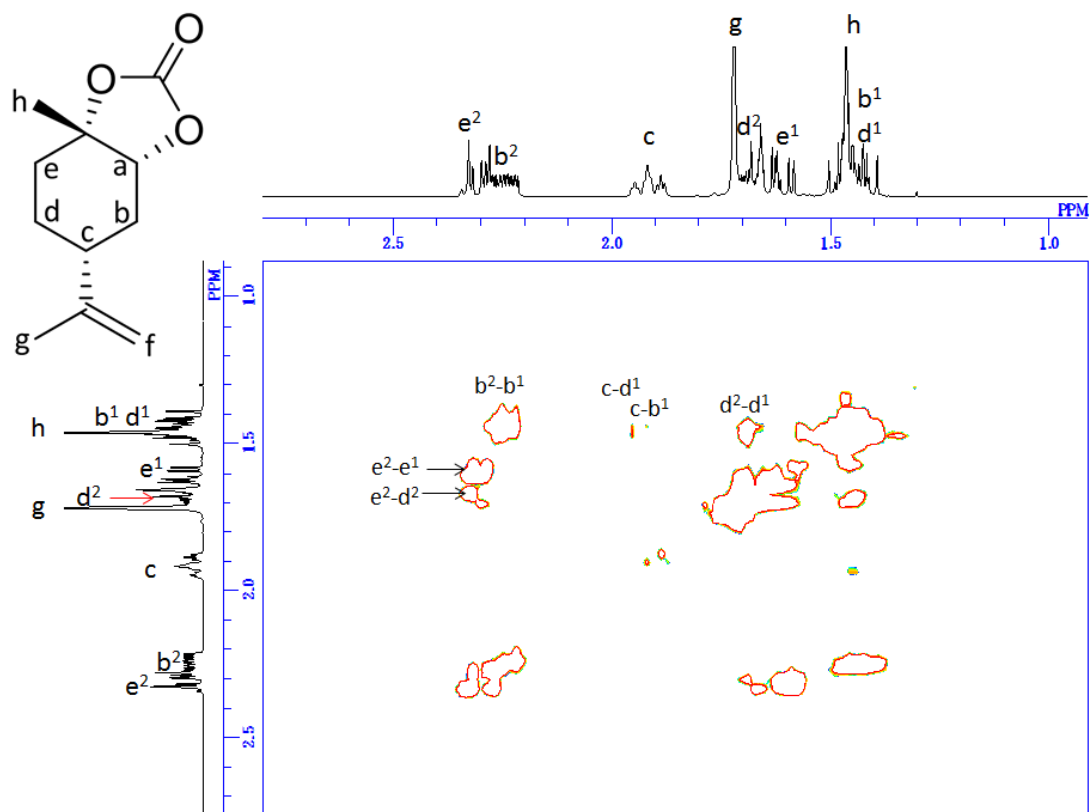

<sup>1</sup>H-<sup>1</sup>H COSY spectra of **1a** in CDCl<sub>3</sub>; selected range with (top) high sensitivity and (bottom) low sensitivity.

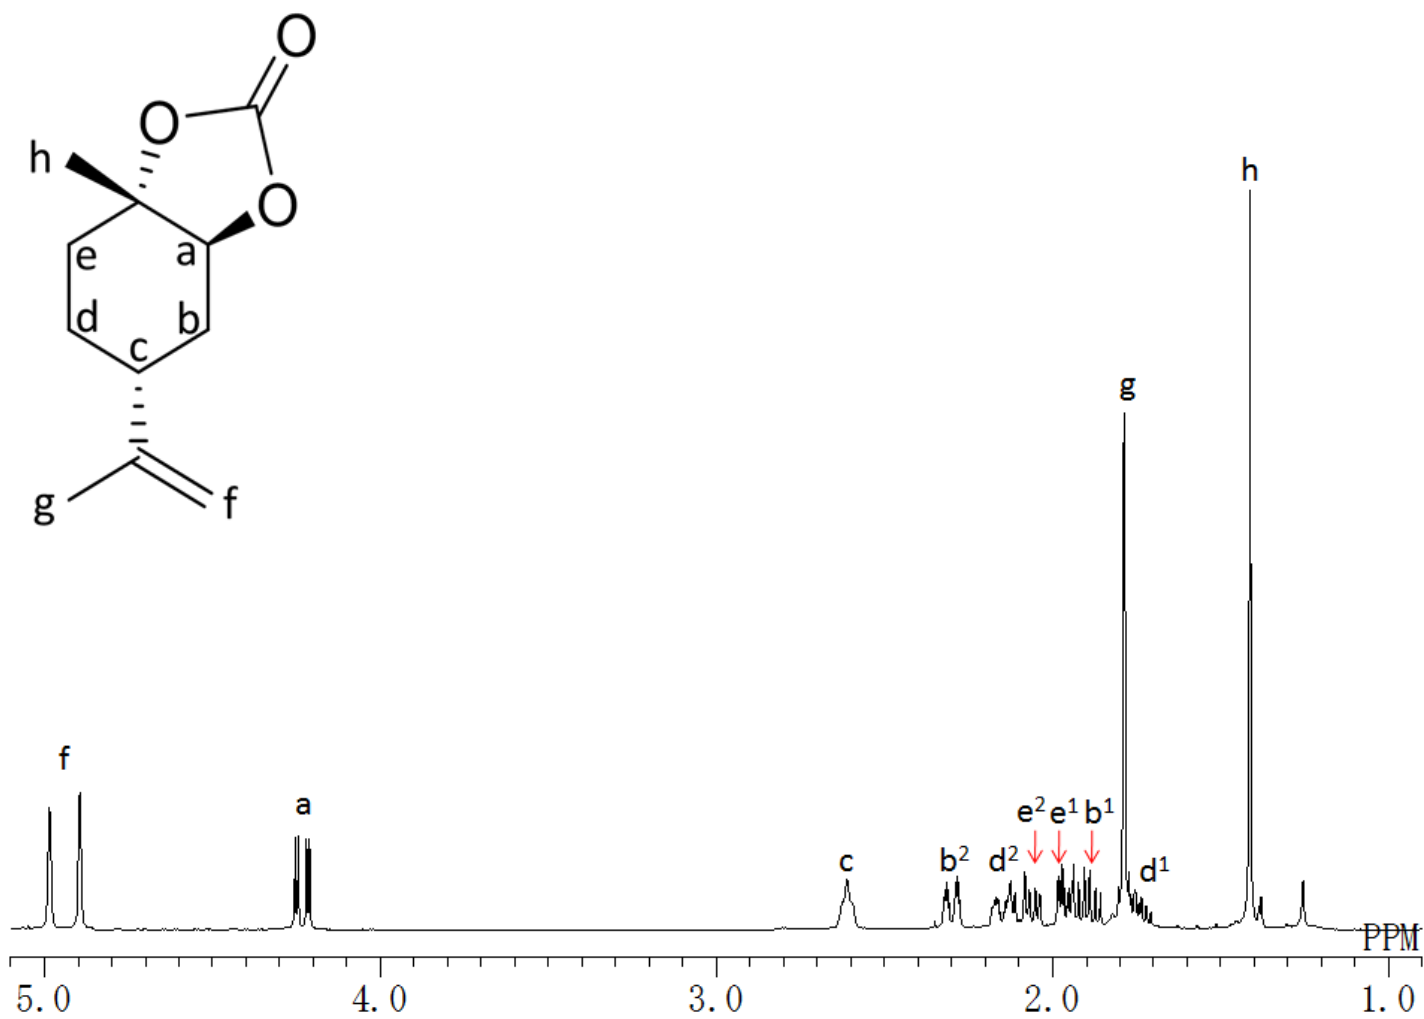

$^1\text{H}$  NMR spectrum of **1b** in  $\text{CDCl}_3$ .

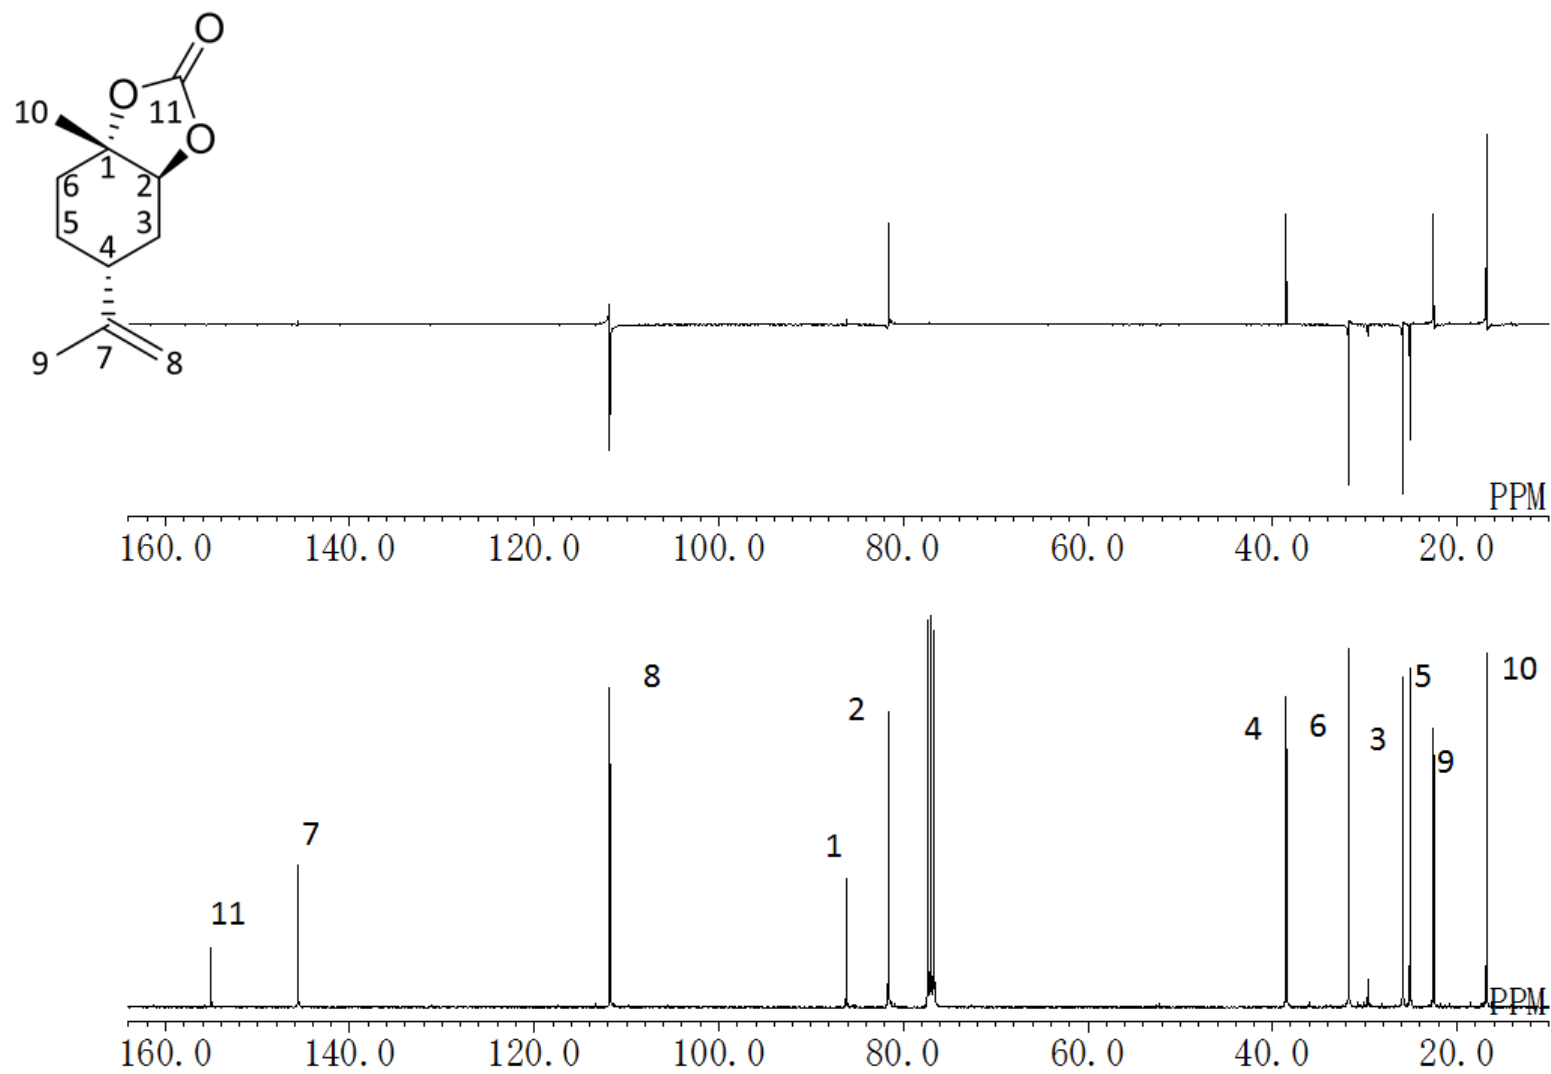

(top) DEPT135 and (bottom) <sup>13</sup>C NMR spectra of **1b** in CDCl<sub>3</sub>.

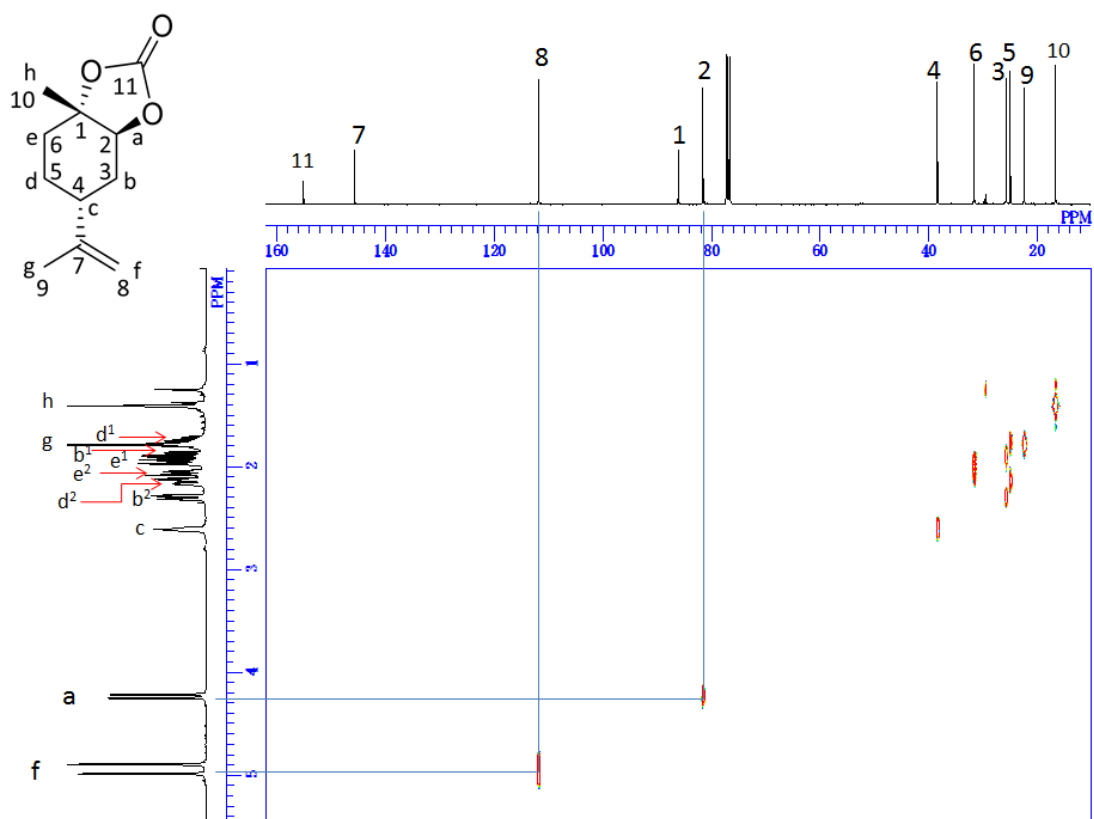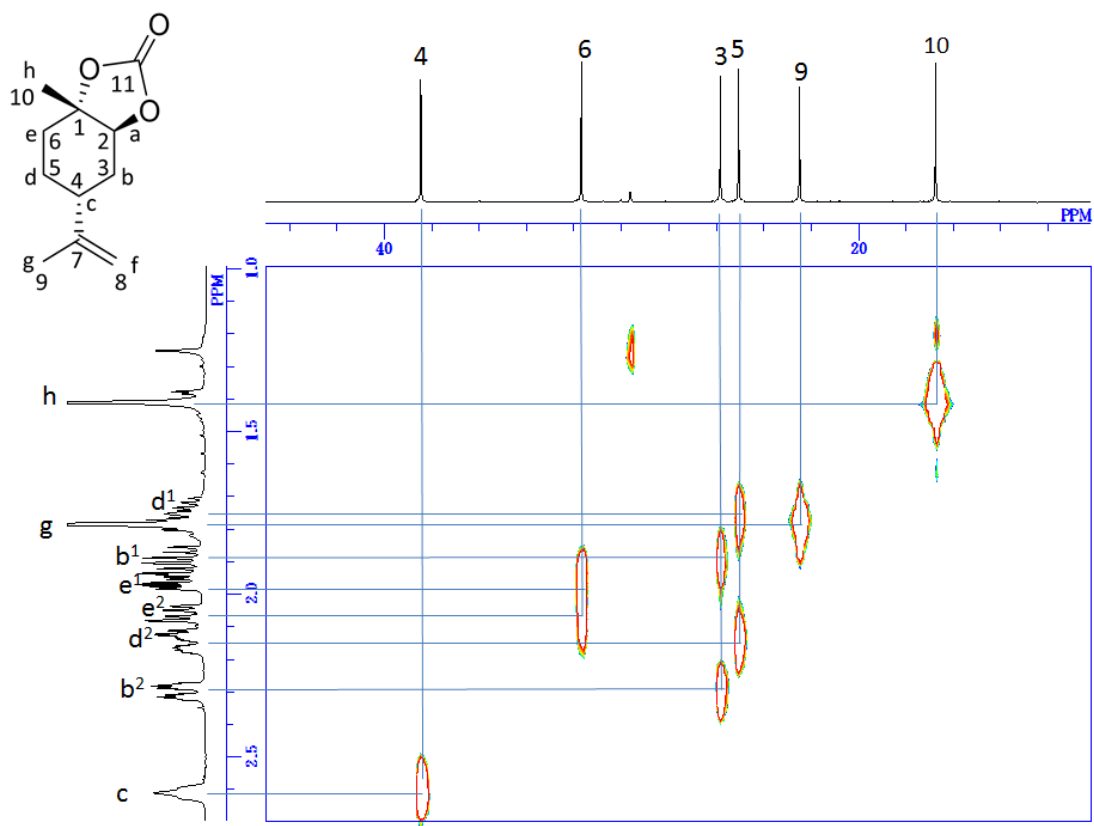

HETCOR spectra of **1b** in  $\text{CDCl}_3$ ; (top) full range and (bottom) selected range.

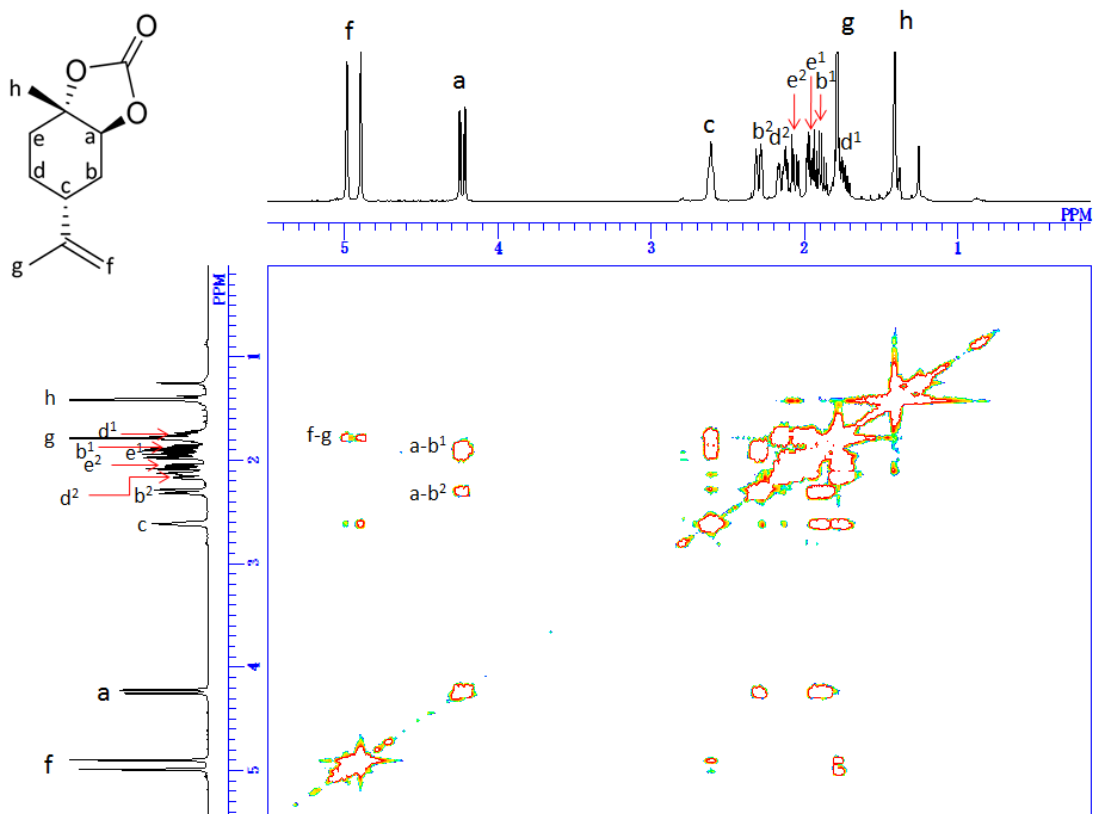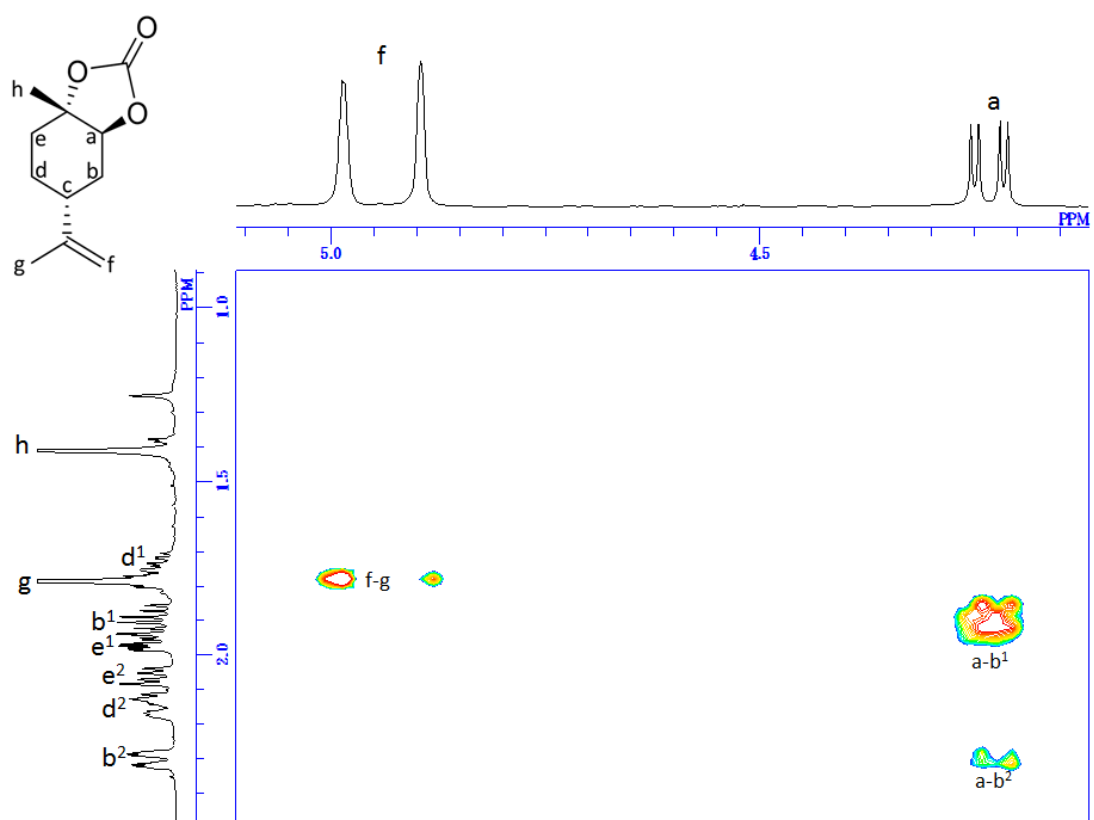

$^1\text{H}$ - $^1\text{H}$  COSY spectra of **1b** in  $\text{CDCl}_3$ ; (top) full range and (bottom) selected range.

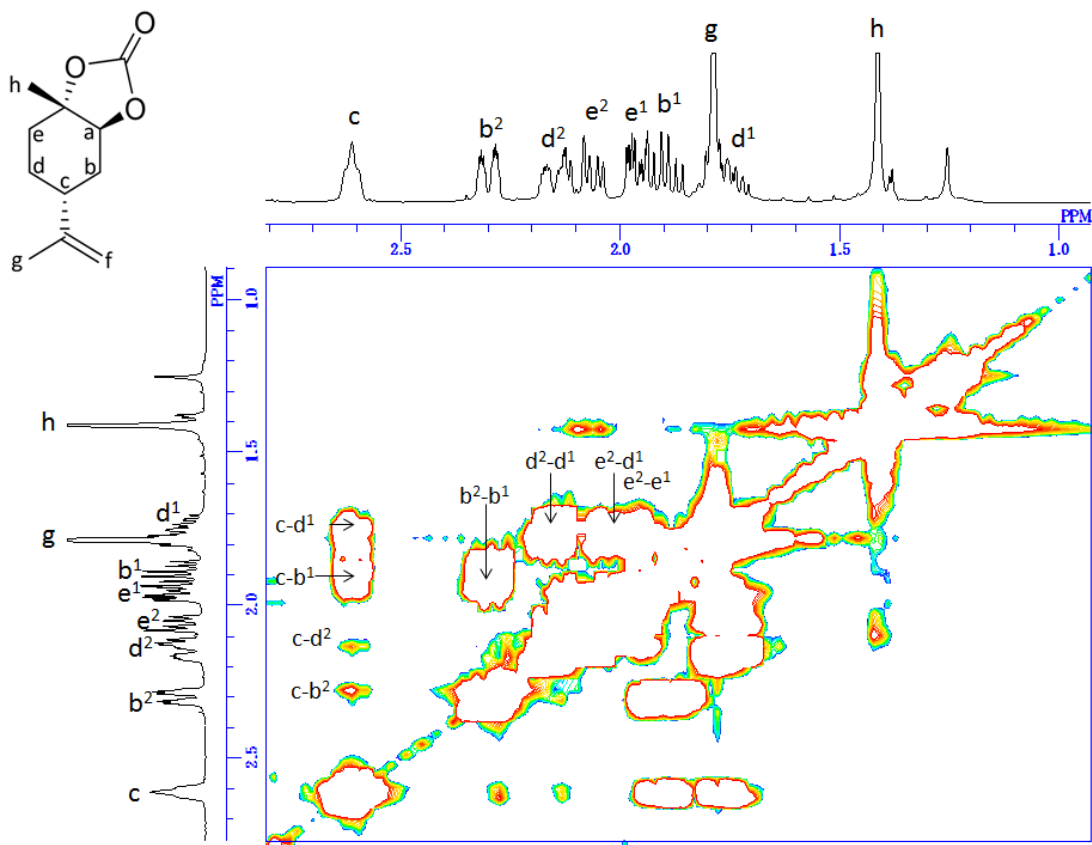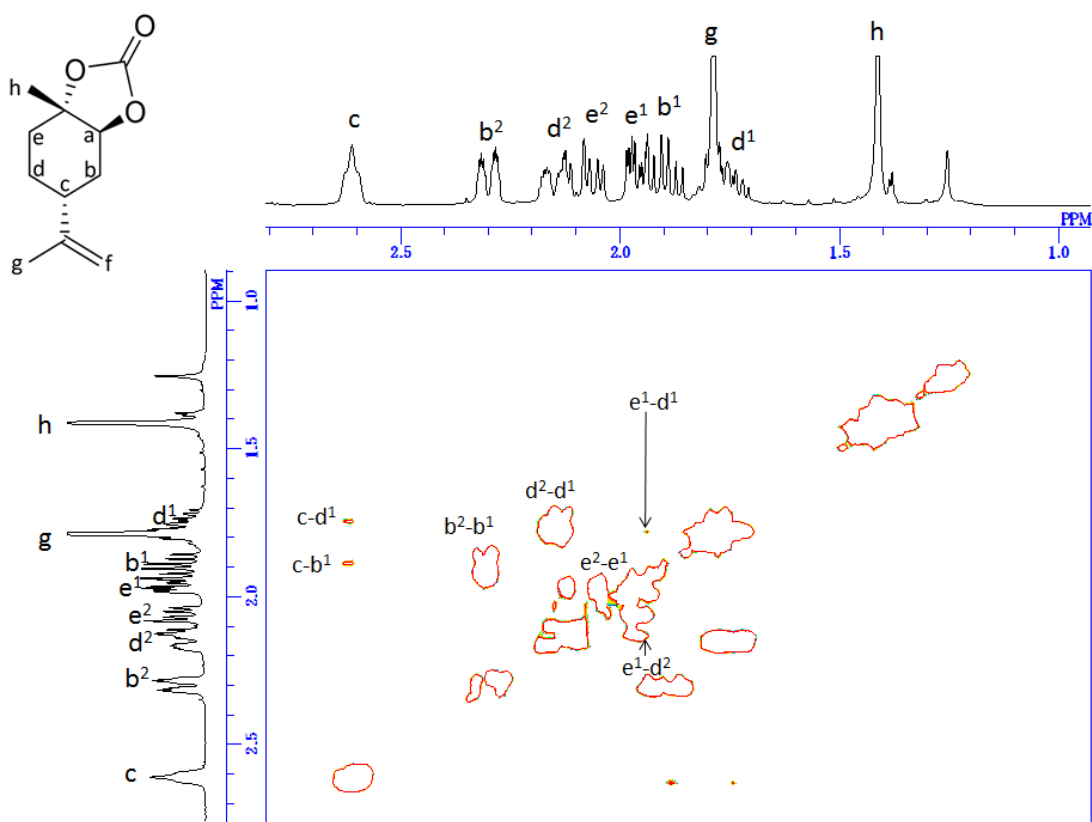

$^1\text{H}$ - $^1\text{H}$  COSY spectra of **1b** in  $\text{CDCl}_3$ ; selected range with (top) high sensitivity and (bottom) low sensitivity.

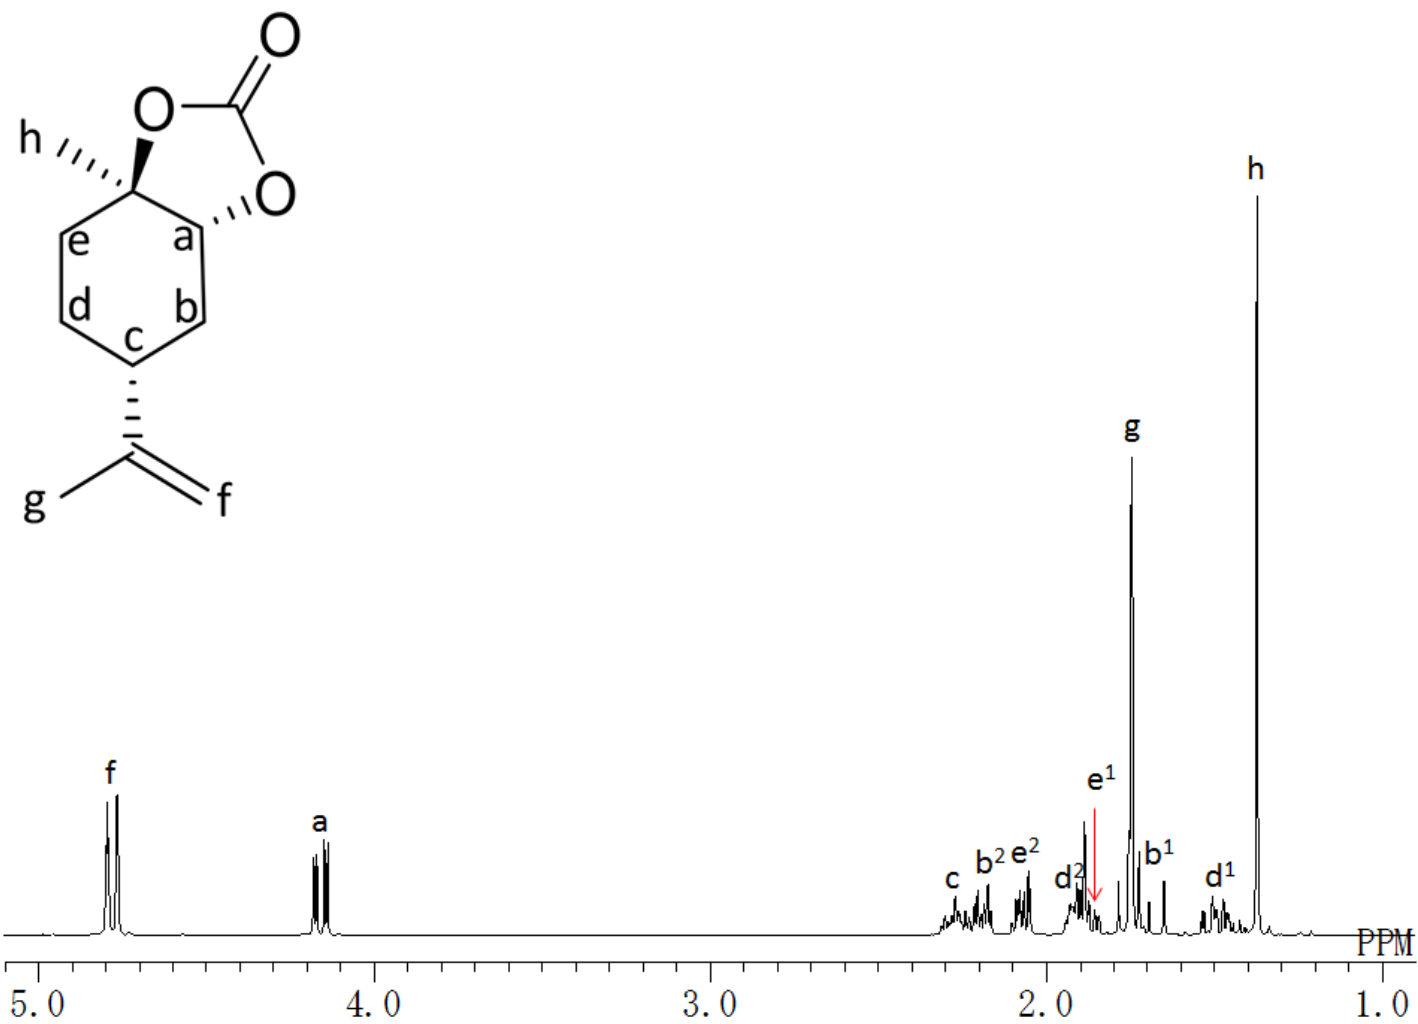

$^1\text{H}$  NMR spectrum of **1c** in  $\text{CDCl}_3$ .

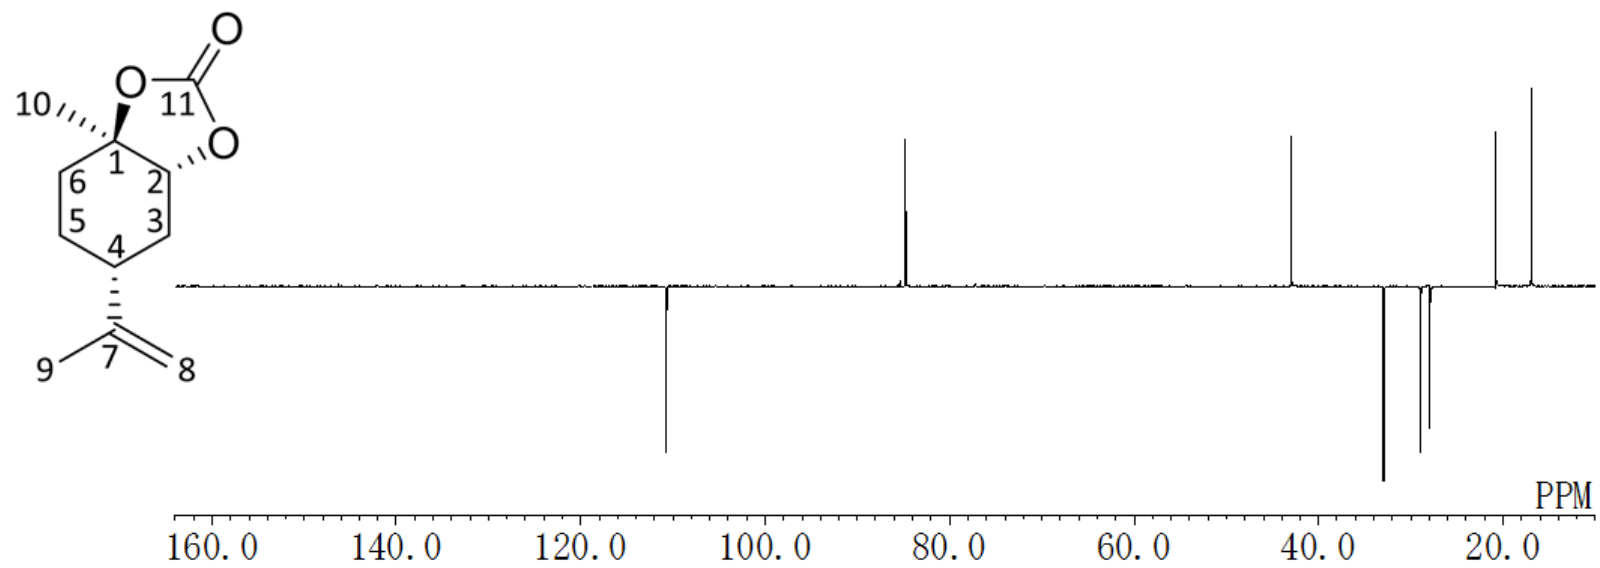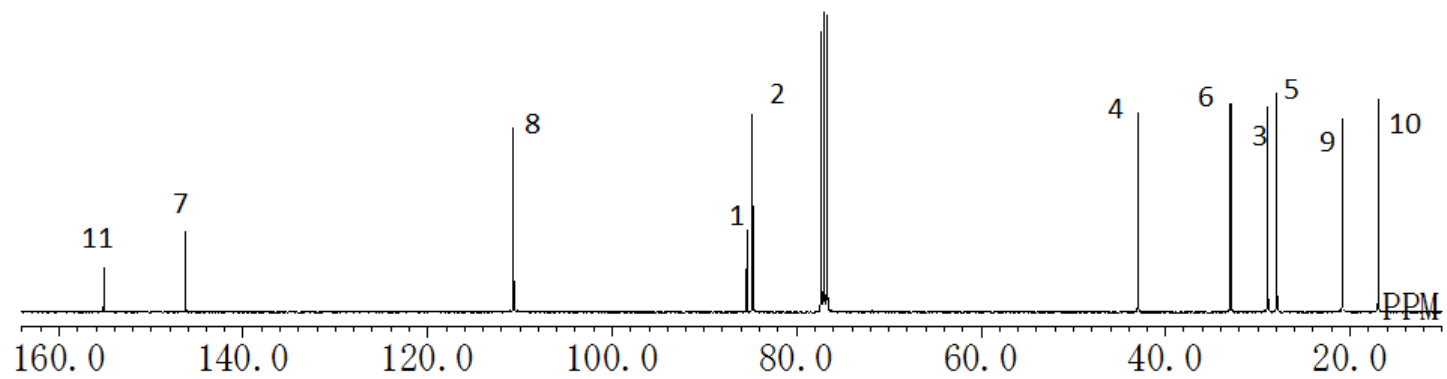

(top) DEPT135 and (bottom)  $^{13}\text{C}$  NMR spectra of **1c** in  $\text{CDCl}_3$ .



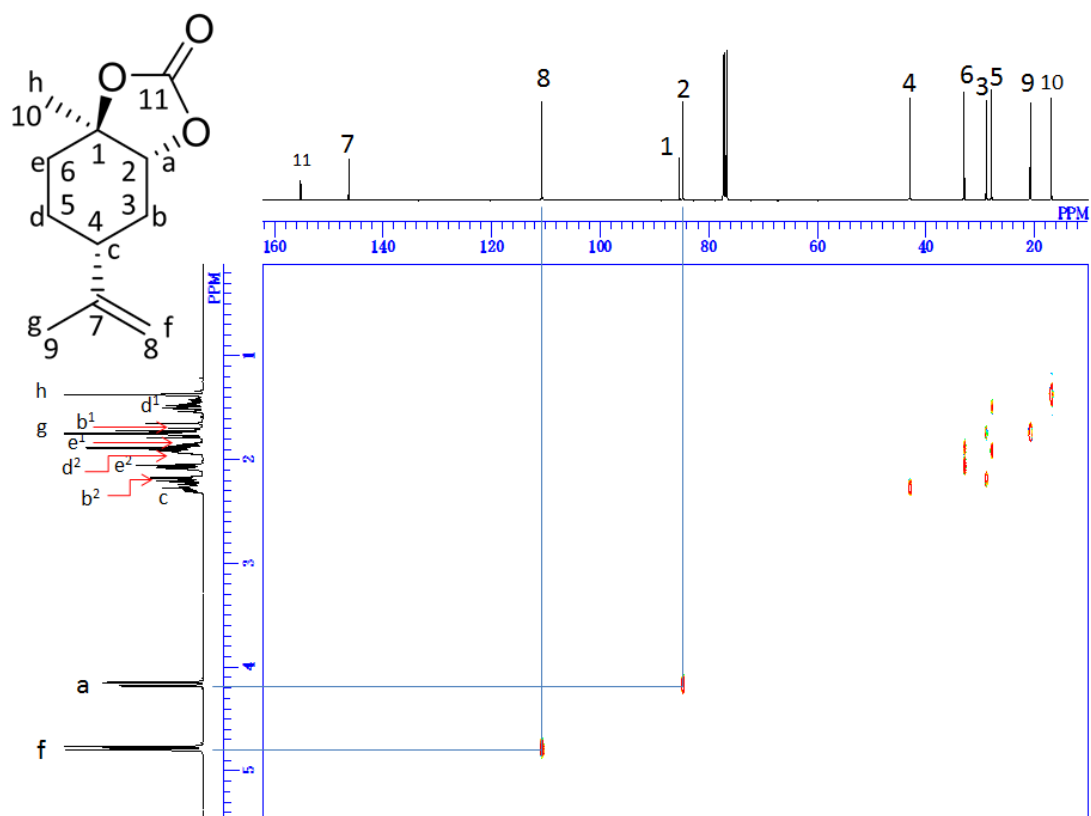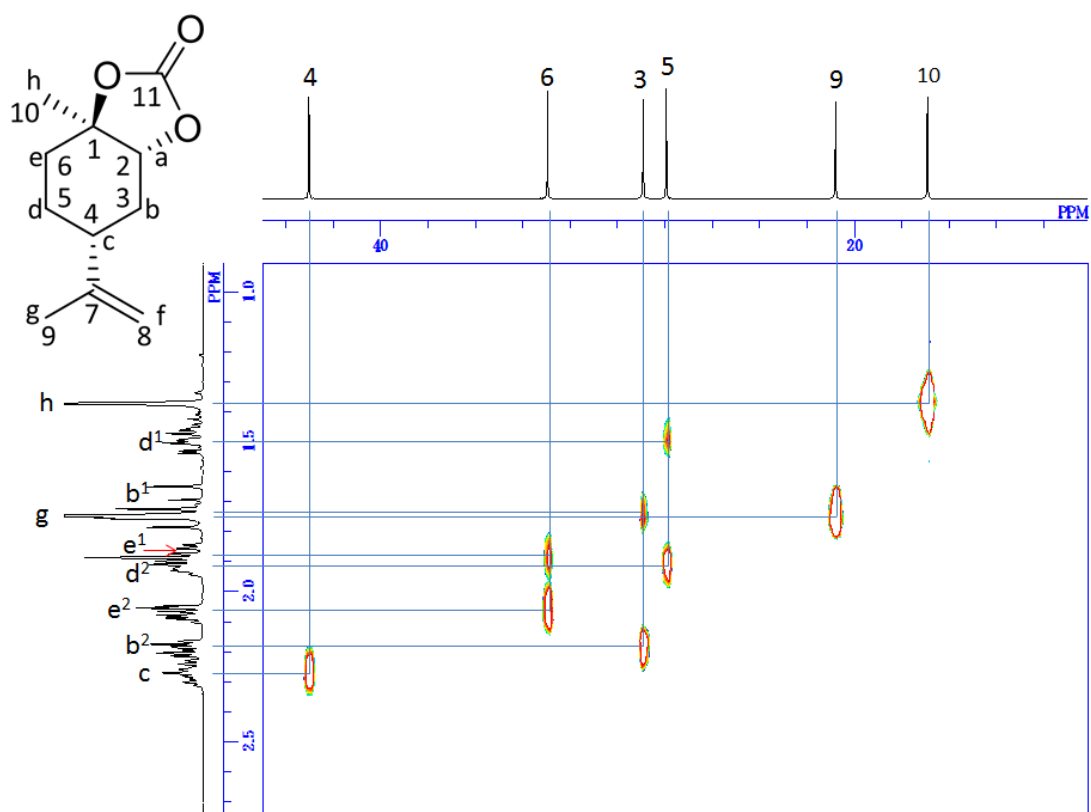

HETCOR spectra of **1c** in  $\text{CDCl}_3$ ; (top) full range and (bottom) selected range.

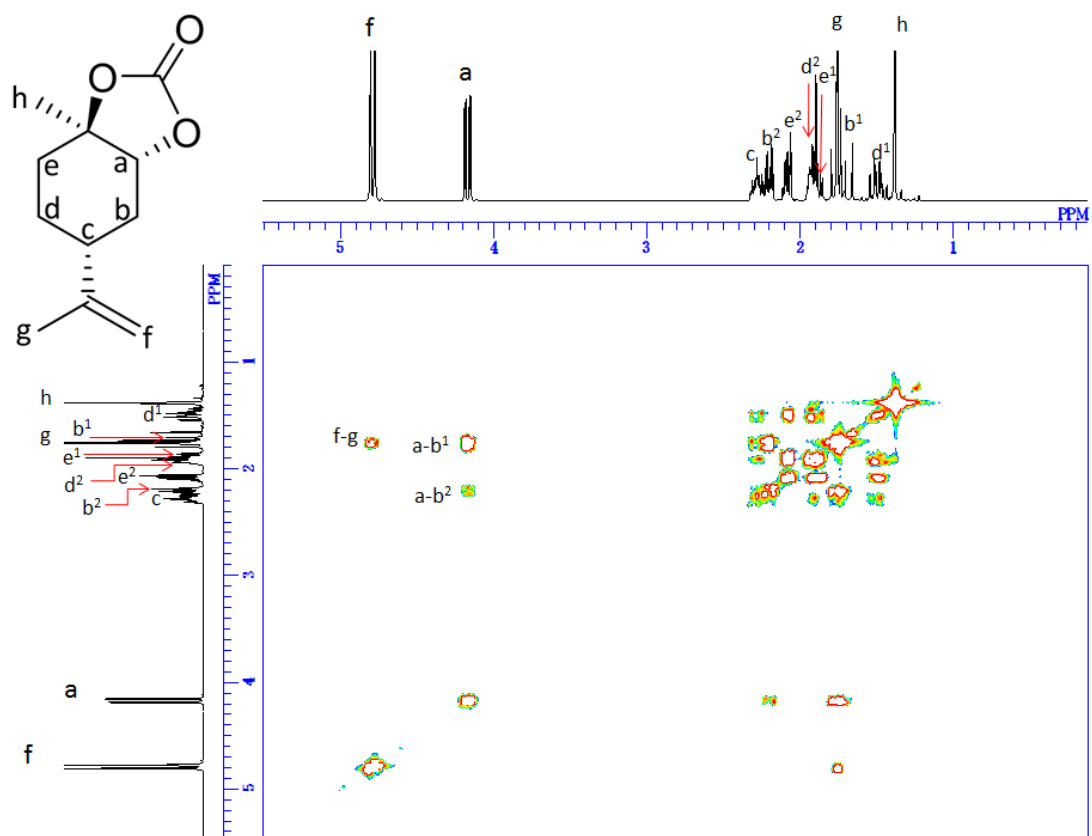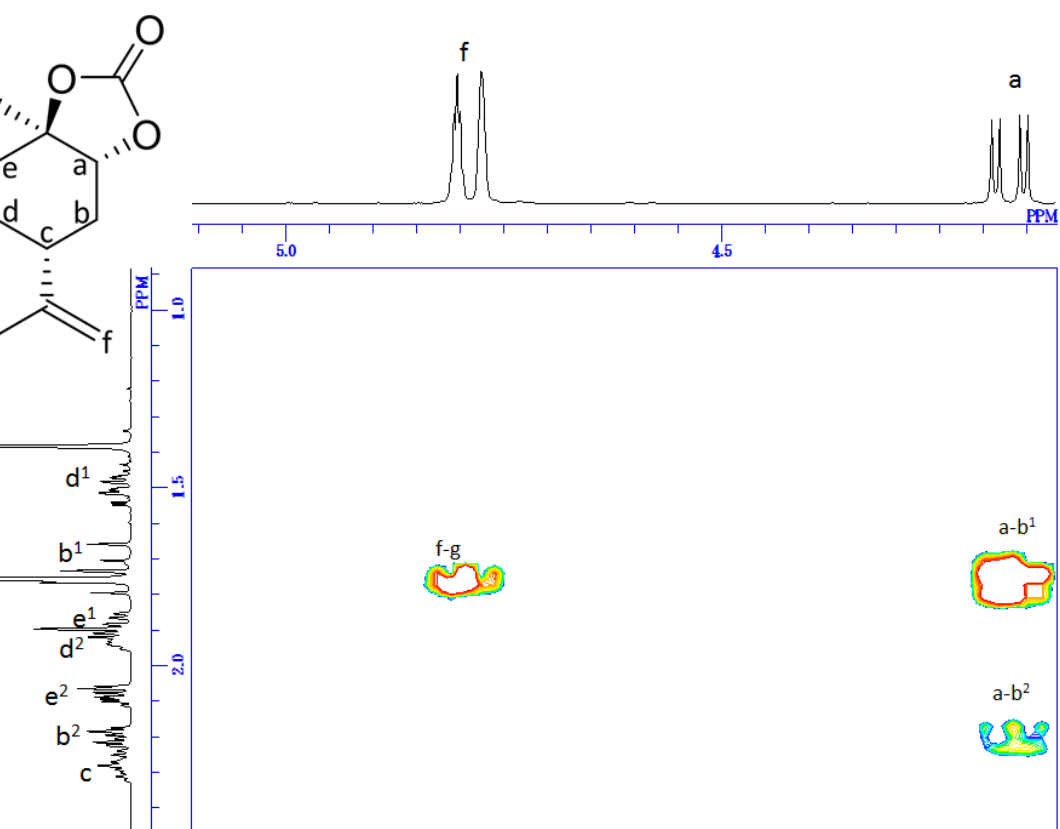

$^1\text{H}$ - $^1\text{H}$  COSY spectra of **1c** in  $\text{CDCl}_3$ ; (top) full range and (bottom) selected range.

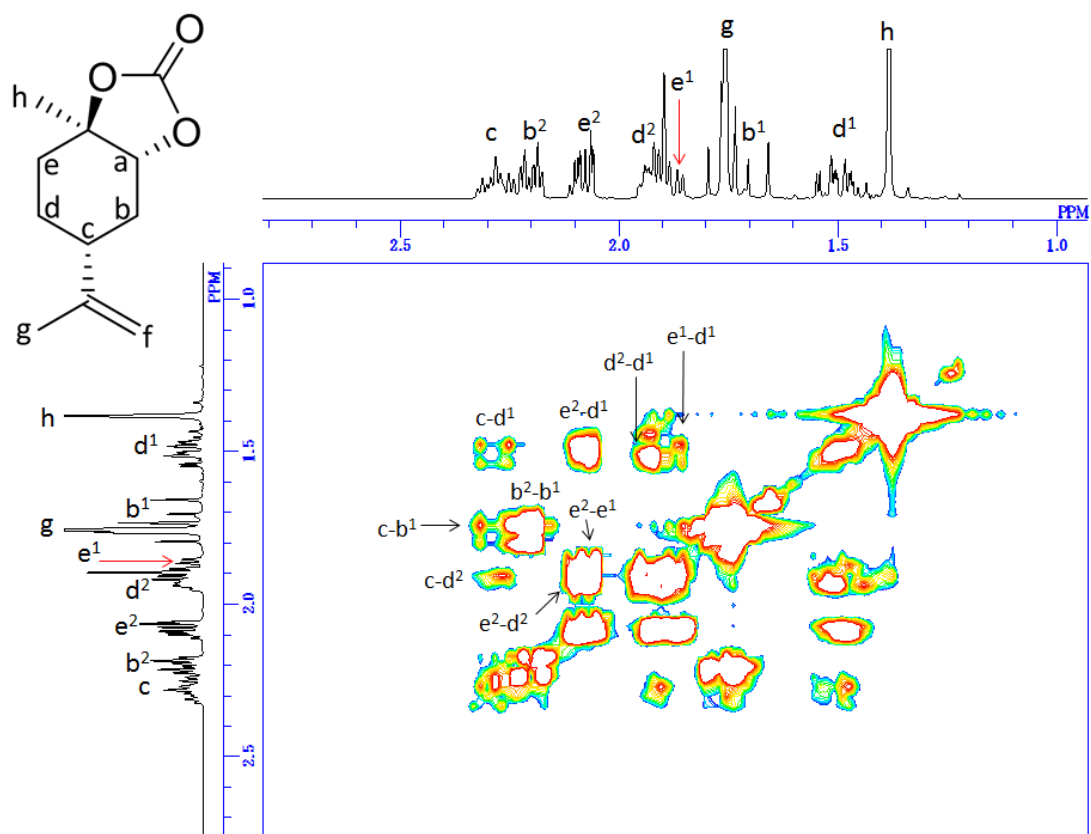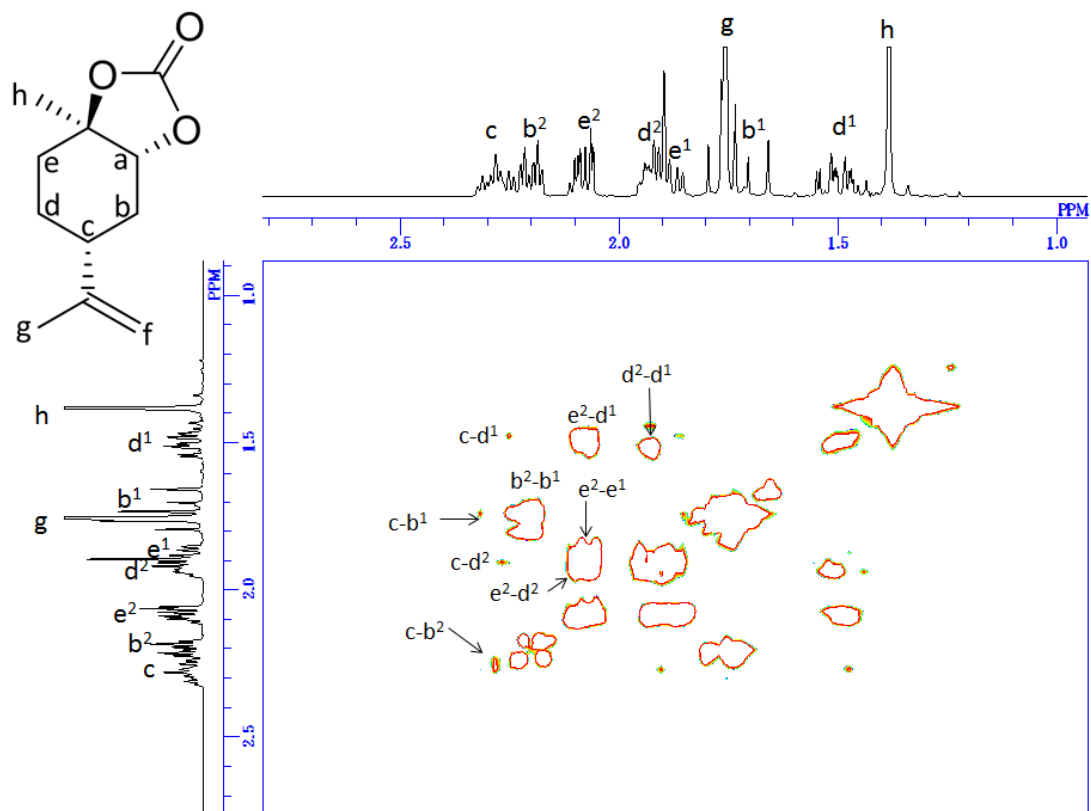

$^1\text{H}$ - $^1\text{H}$  COSY spectra of **1c** in  $\text{CDCl}_3$ ; selected range with (top) high sensitivity and (bottom) low sensitivity.

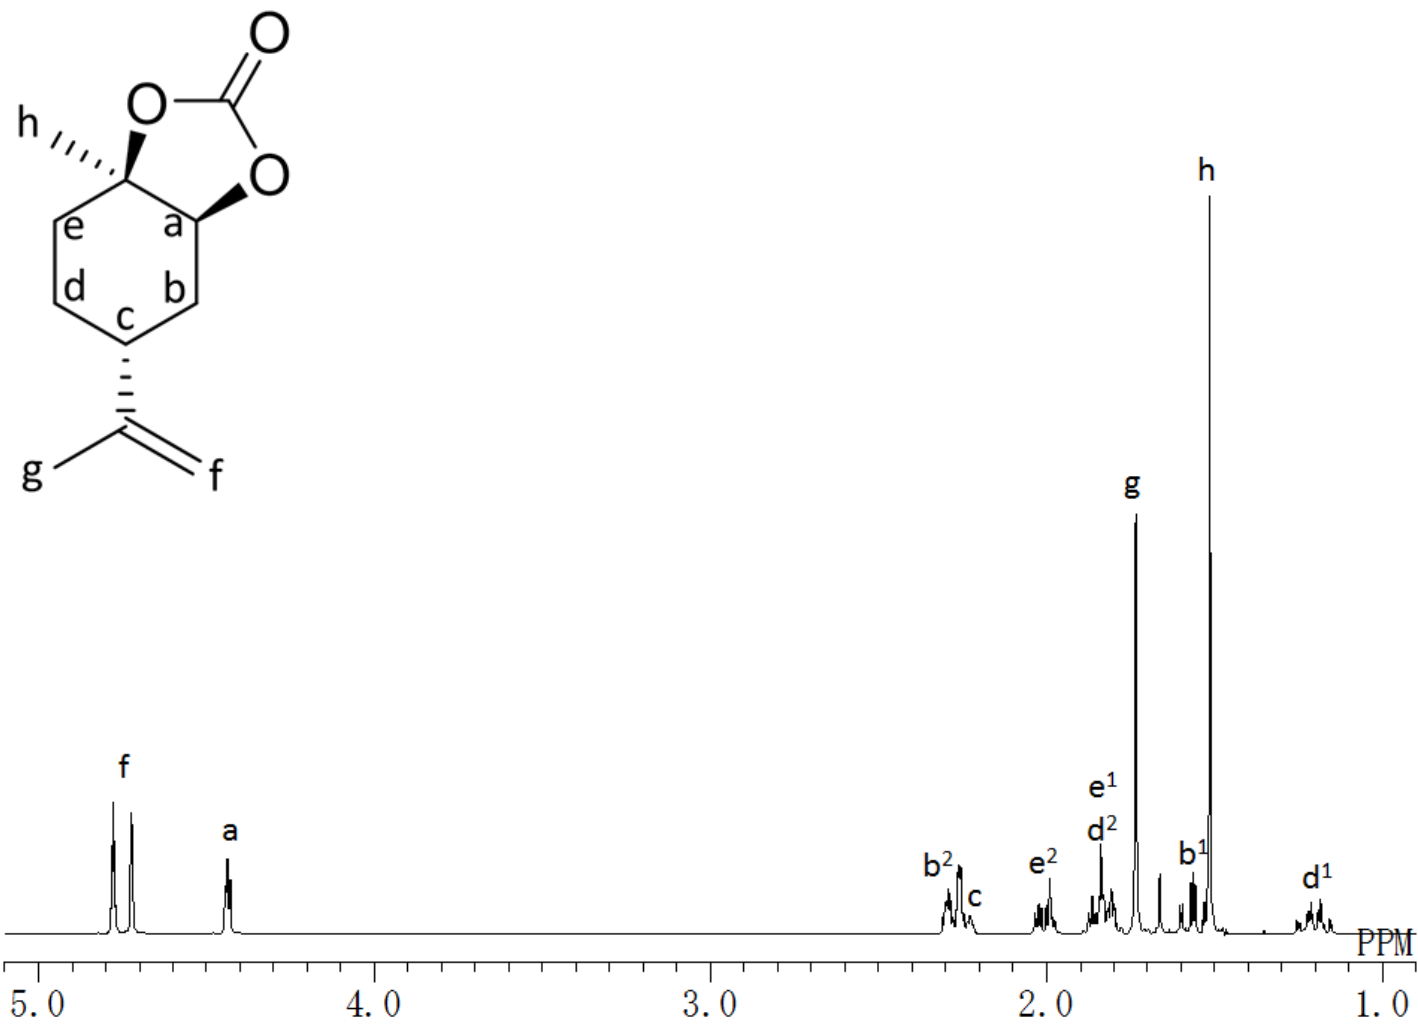

$^1\text{H}$  NMR spectrum of **1d** in  $\text{CDCl}_3$ .

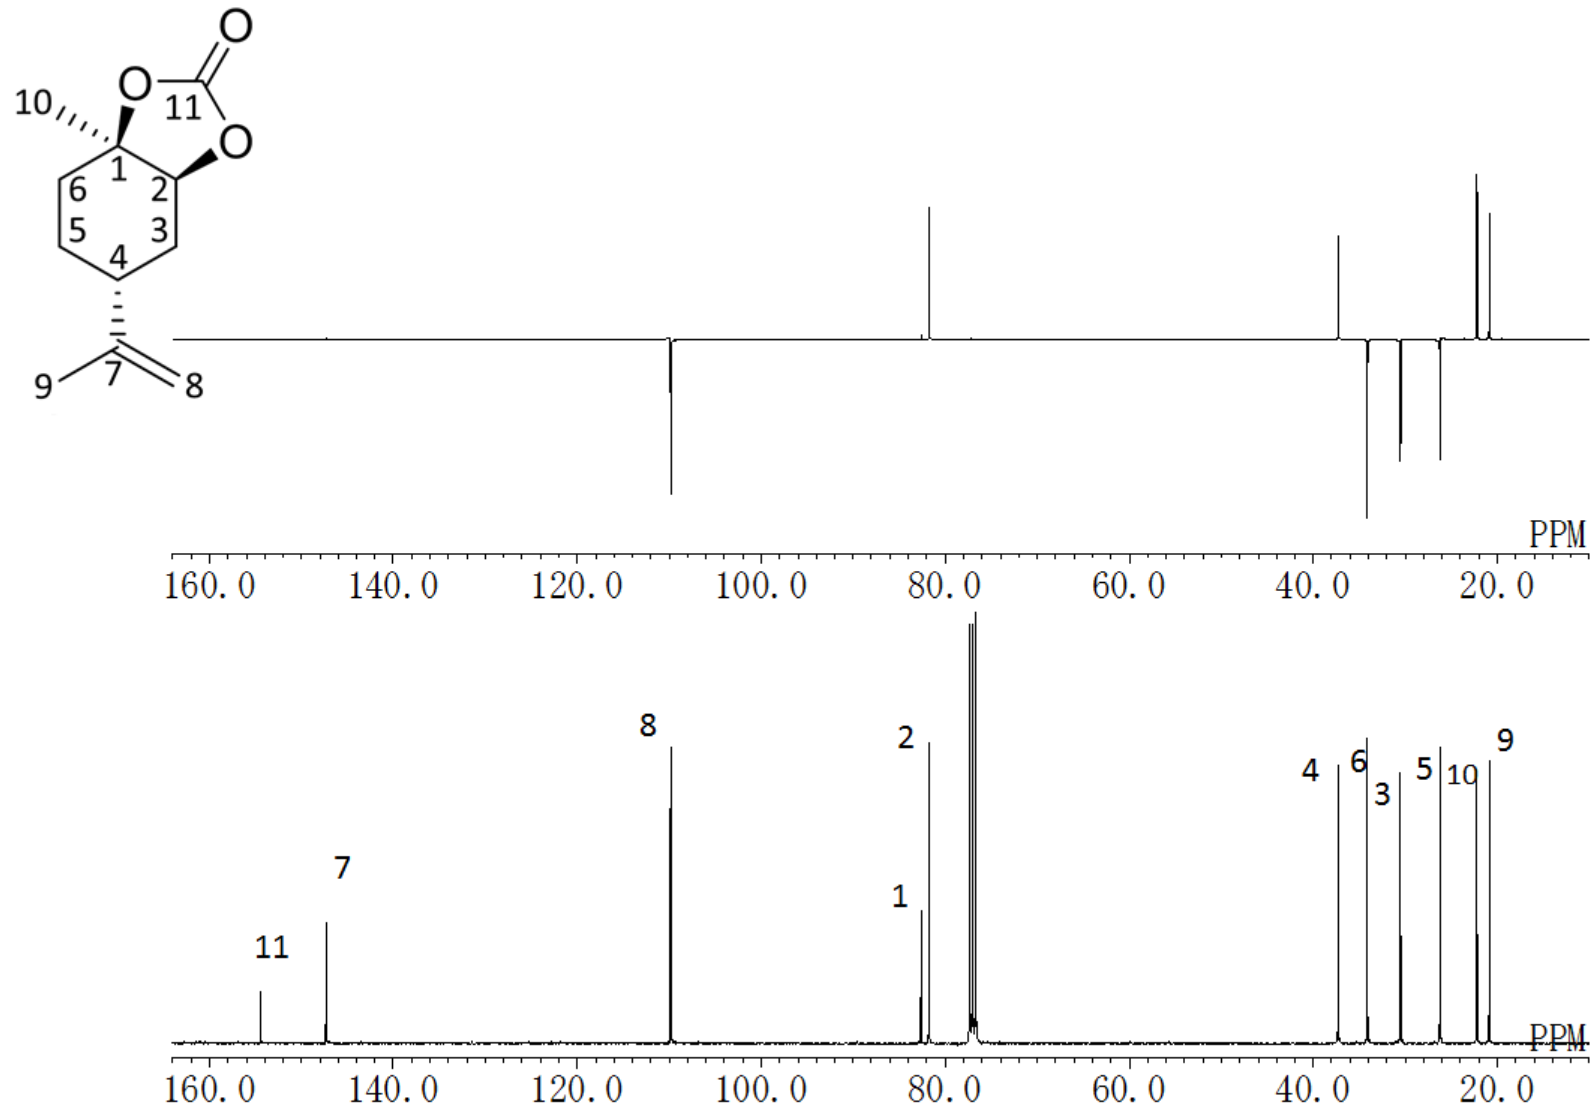

(top) DEPT135 and (bottom)  $^{13}\text{C}$  NMR spectra of **1d** in  $\text{CDCl}_3$ .

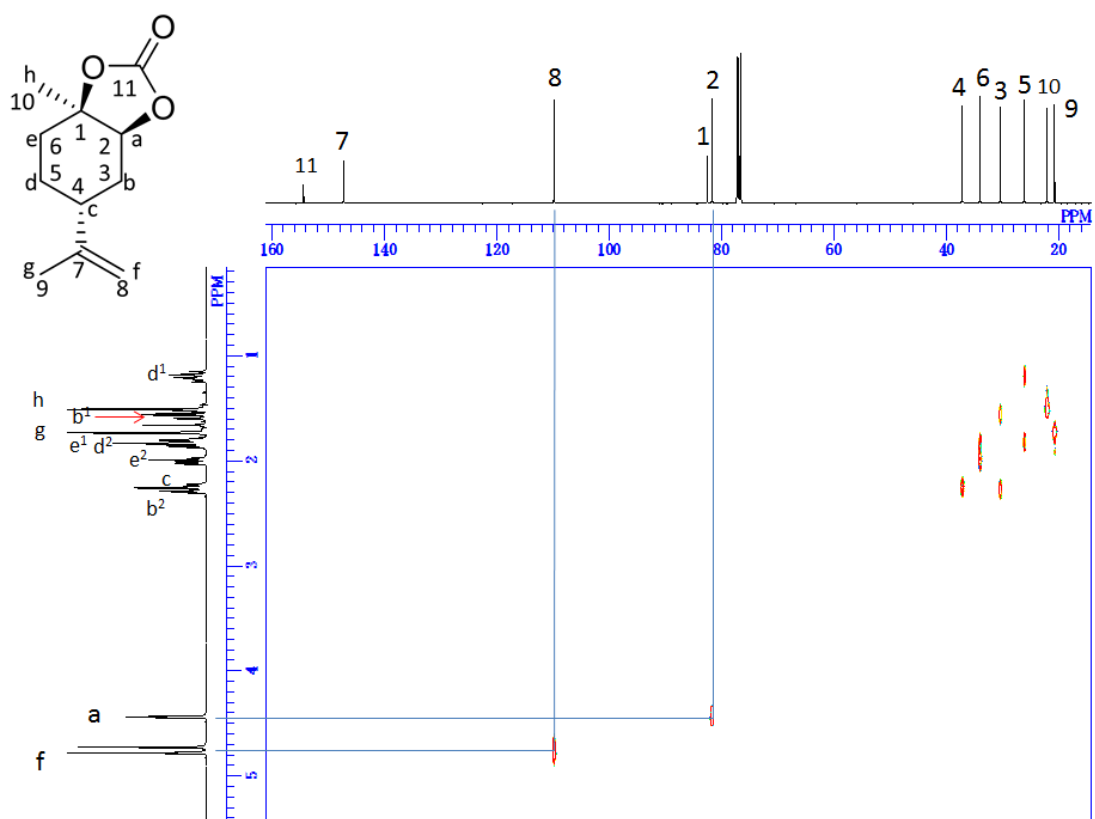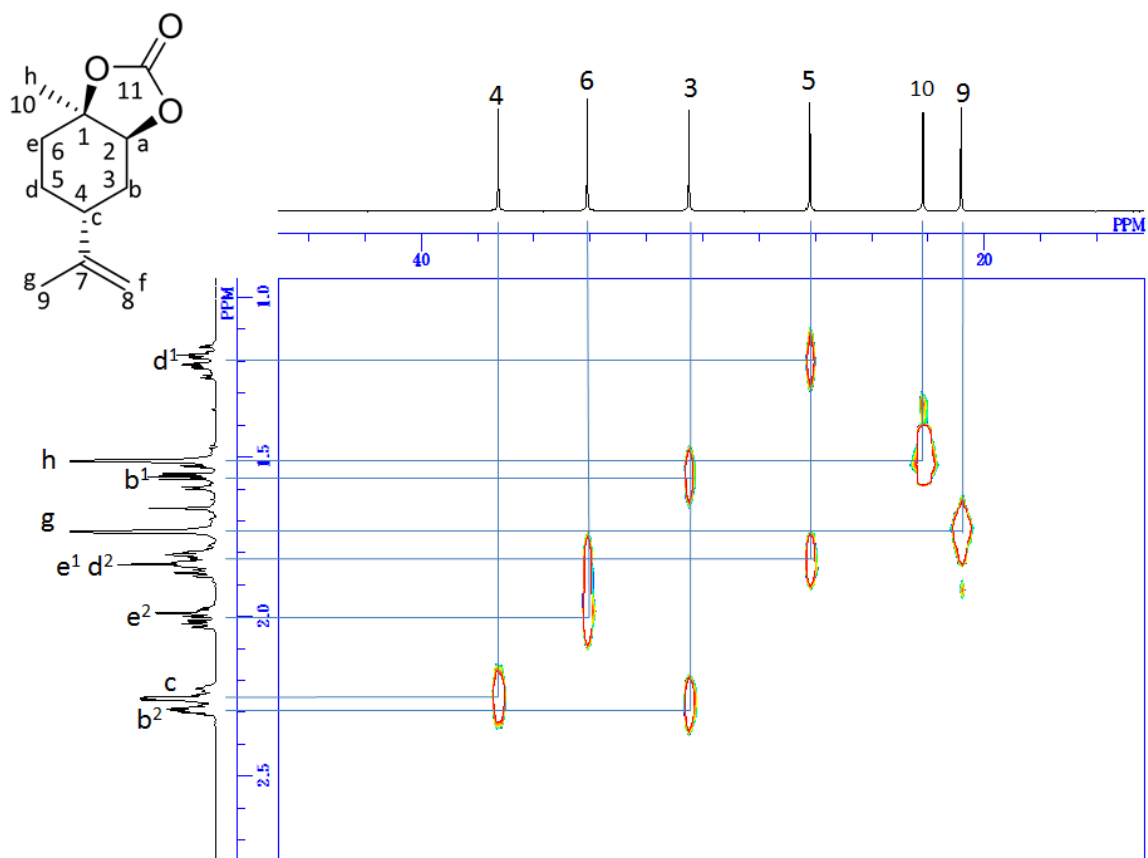

HETCOR spectra of **1d** in  $\text{CDCl}_3$ ; (top) full range and (bottom) selected range.

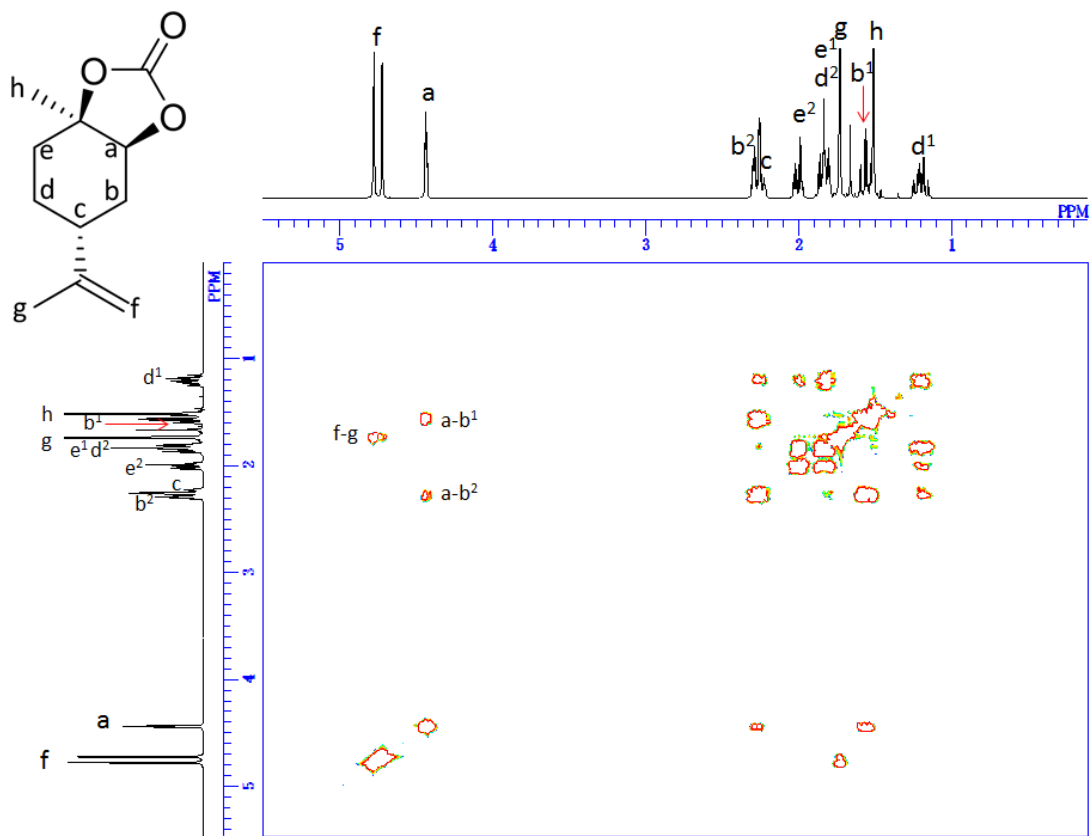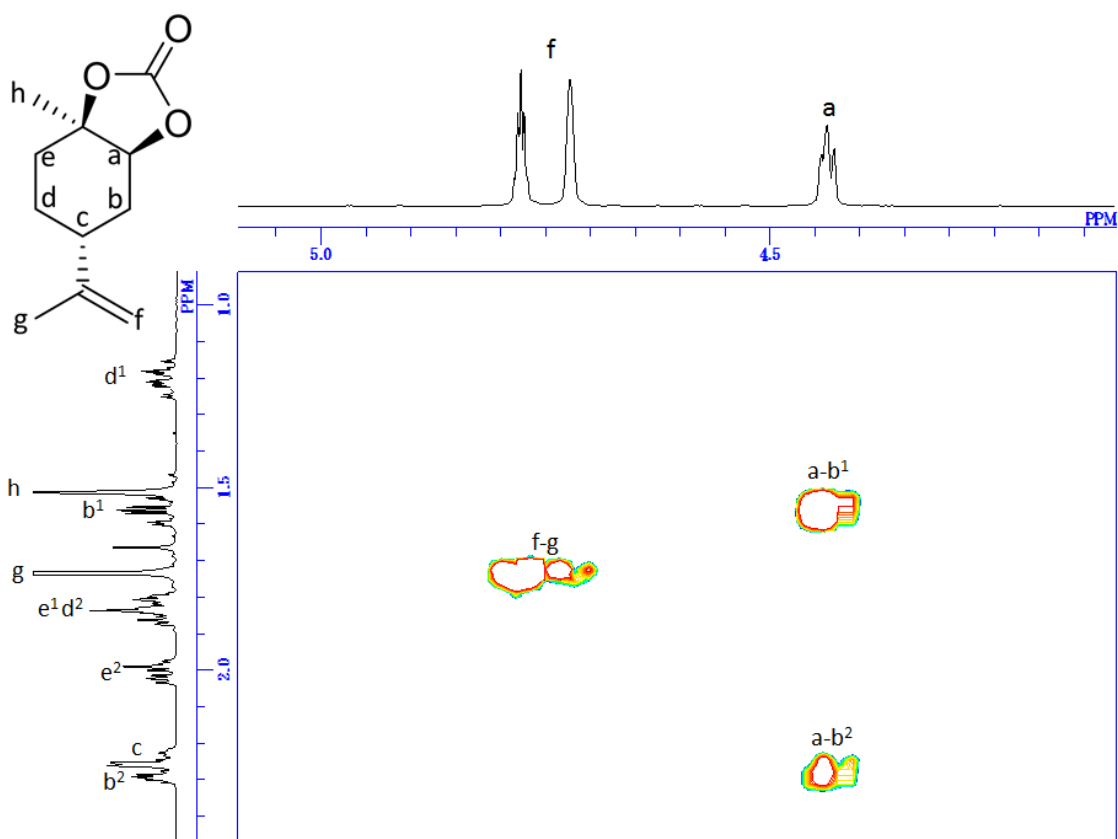

$^1\text{H}$ - $^1\text{H}$  COSY spectra of **1d** in  $\text{CDCl}_3$ ; (top) full range and (bottom) selected range.

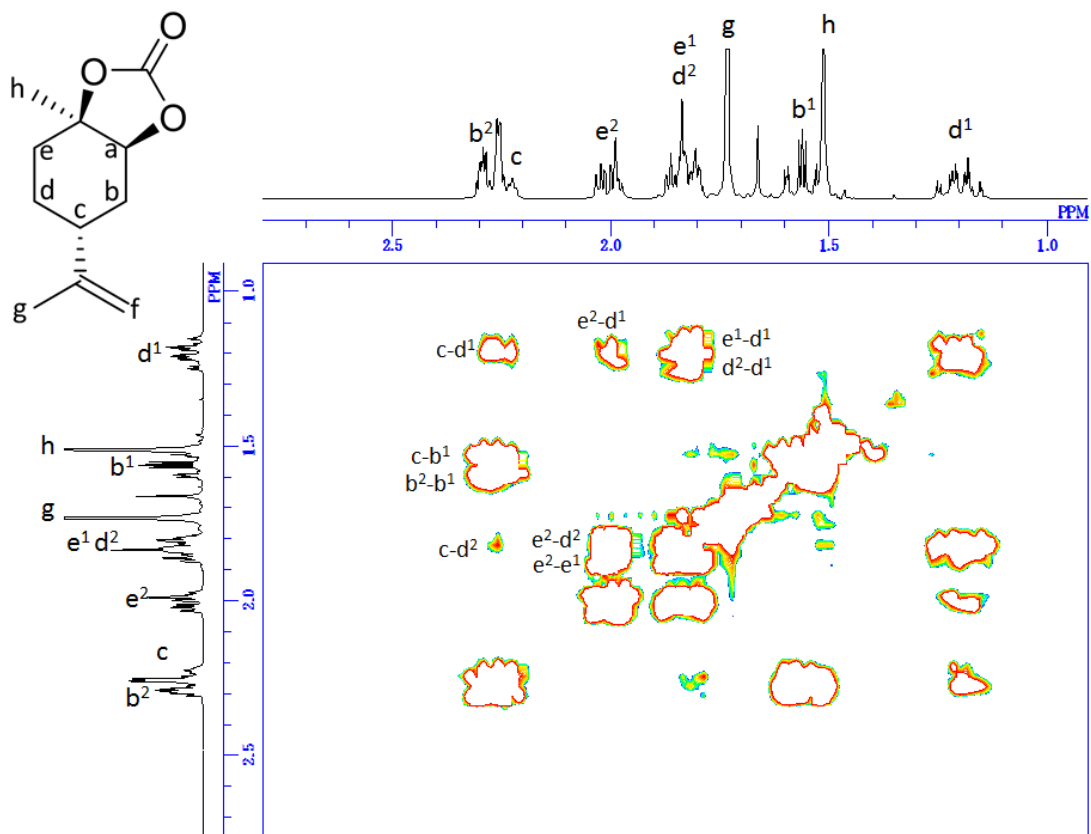

$^1\text{H}$ - $^1\text{H}$  COSY spectra of **1d** in  $\text{CDCl}_3$ ; selected range with (top) high sensitivity and (bottom) low sensitivity.



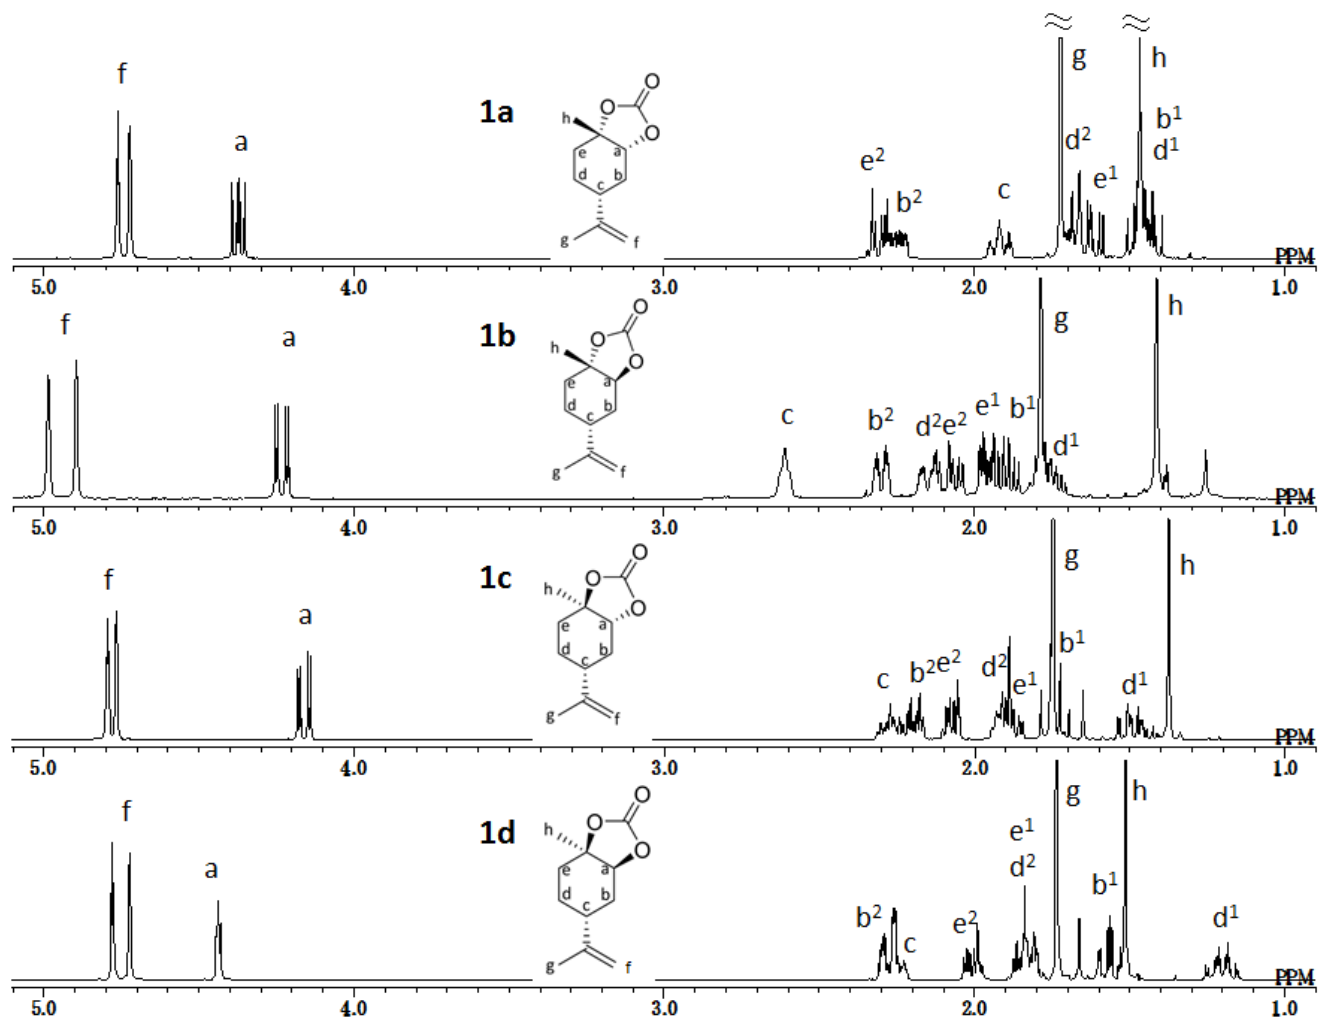

$^1\text{H}$  NMR spectra of four LM5CCs (1a–1d) in full scales in  $\text{CDCl}_3$ .

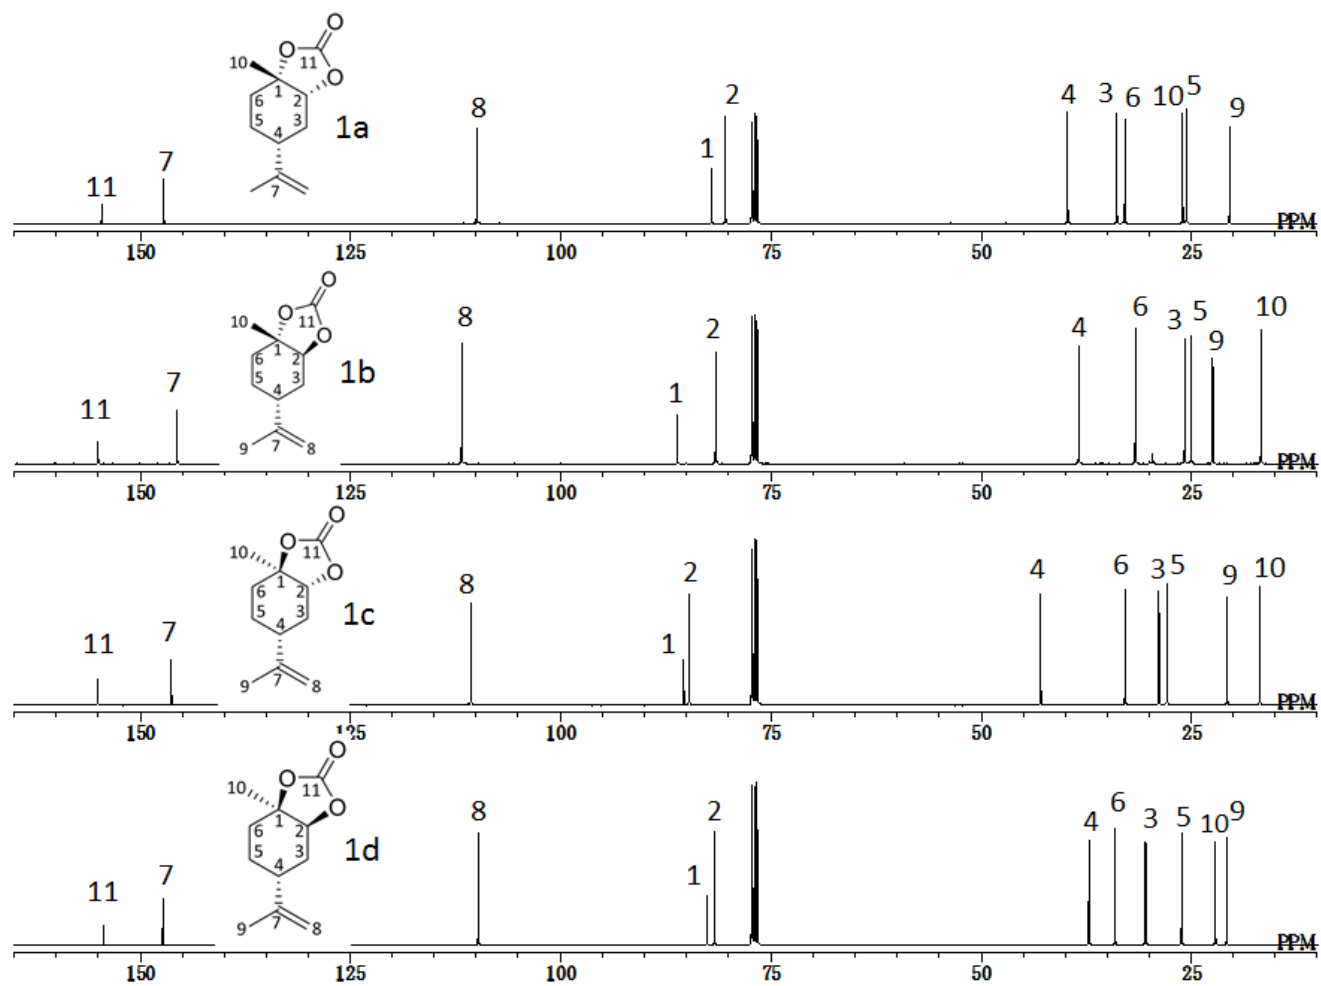

$^{13}\text{C}$  NMR spectra of four LM5CCs (**1a–1d**) in full scales in  $\text{CDCl}_3$ .

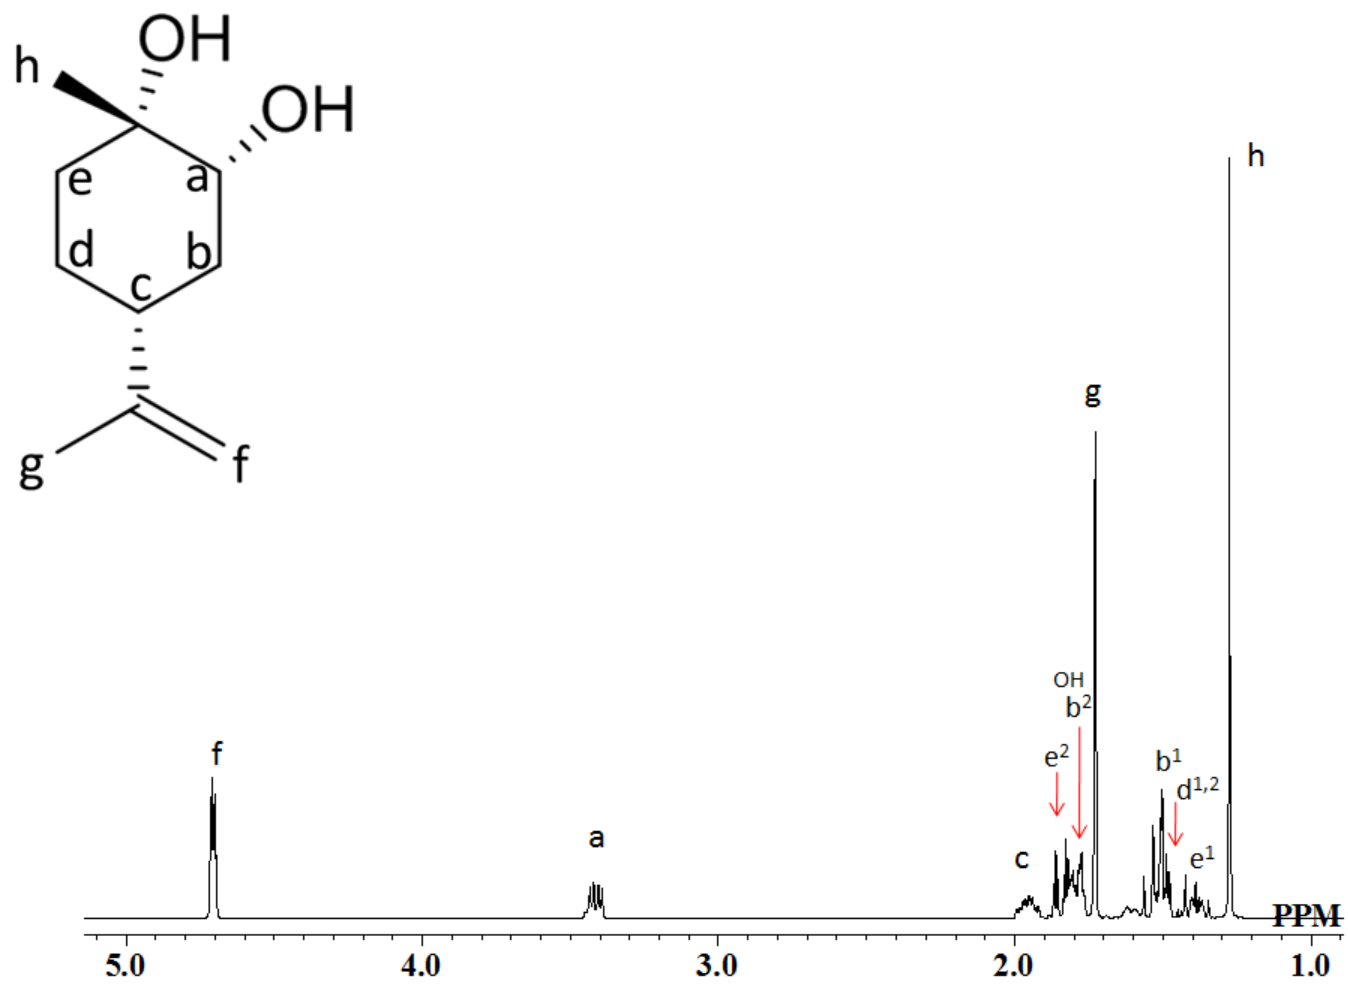

$^1\text{H}$  NMR spectrum of **2a** in CDCl<sub>3</sub>.

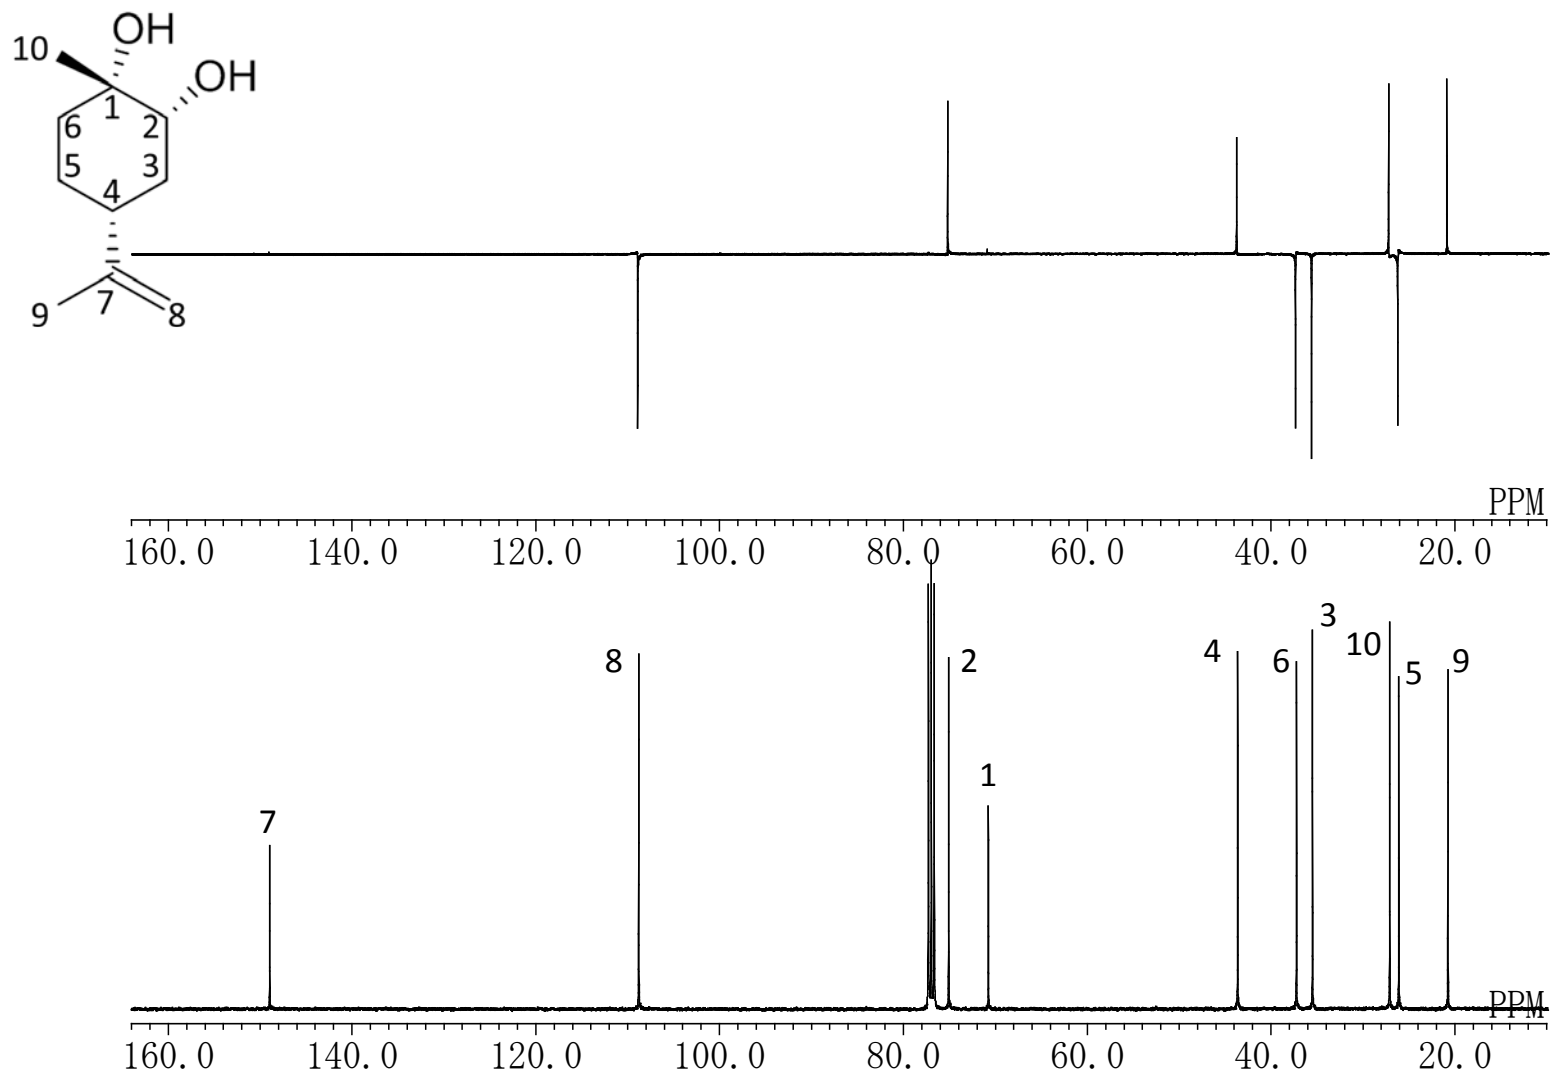

(top) DEPT135 and (bottom)  $^{13}\text{C}$  NMR spectra of **2a** in  $\text{CDCl}_3$

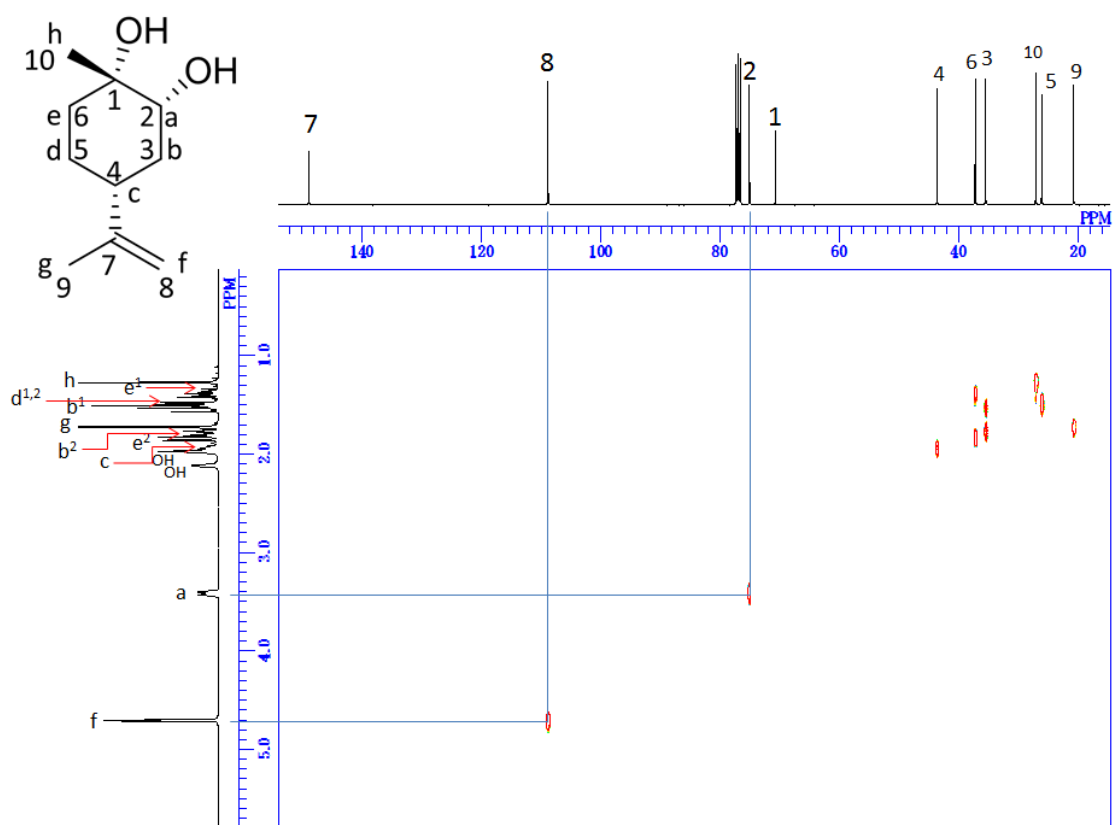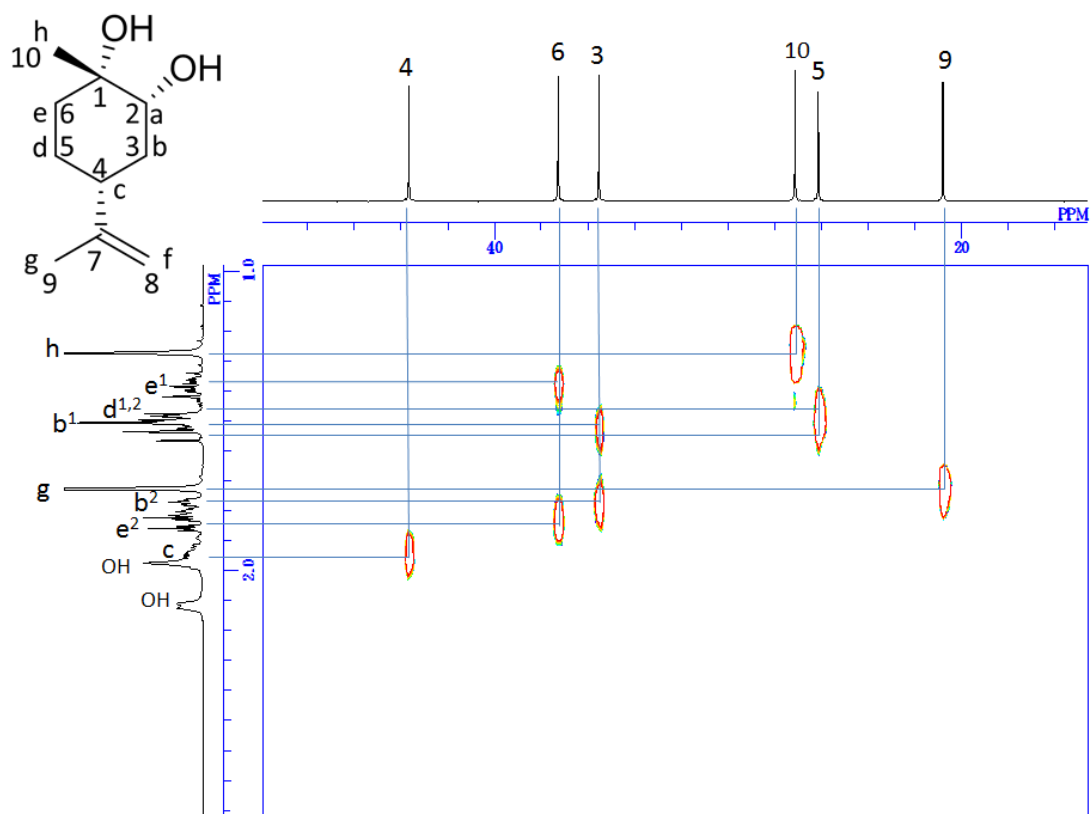

HETCOR spectra of **2a** in  $\text{CDCl}_3$ ; (top) full range and (bottom) selected range.

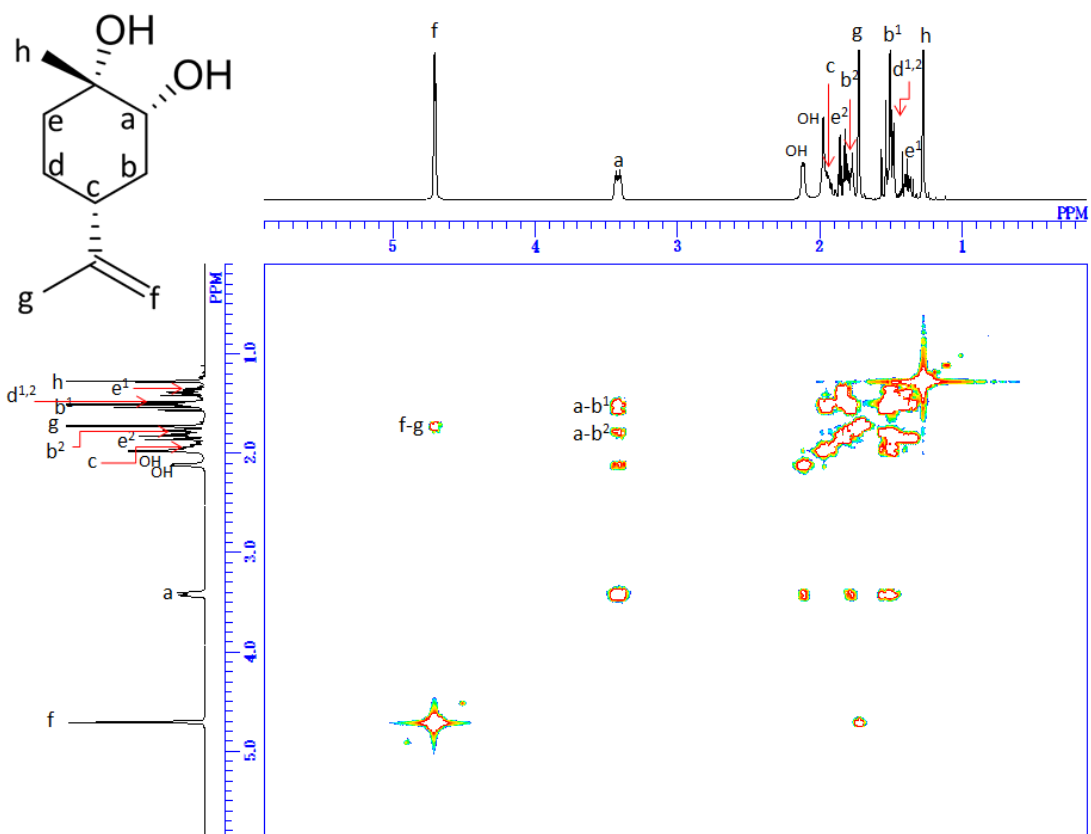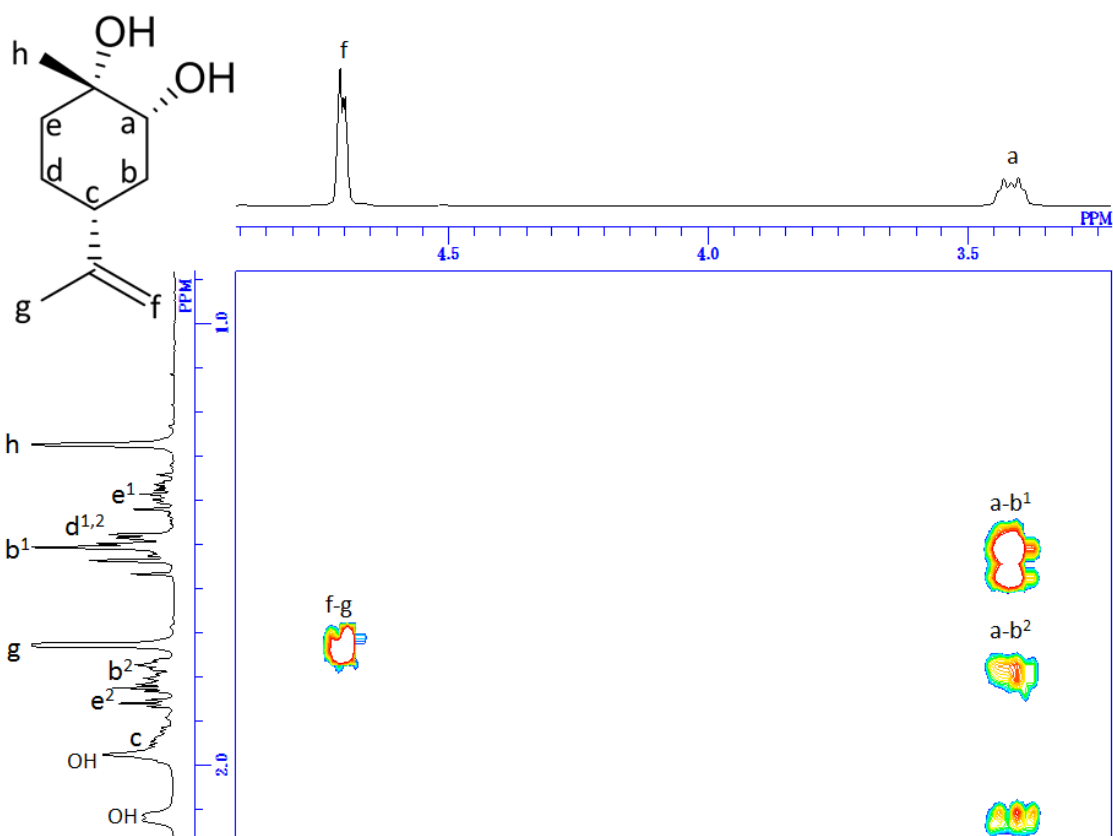

<sup>1</sup>H-<sup>1</sup>H COSY spectra of **2a** in CDCl<sub>3</sub>; (top) full range and (bottom) selected range.

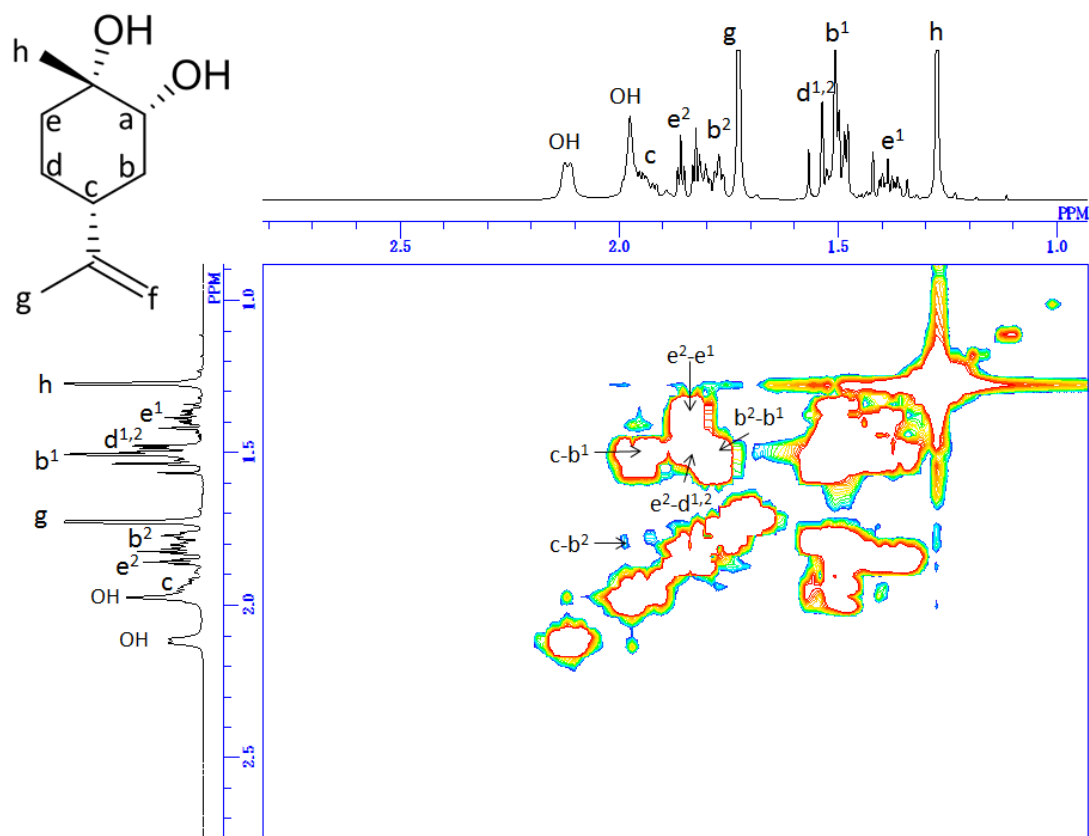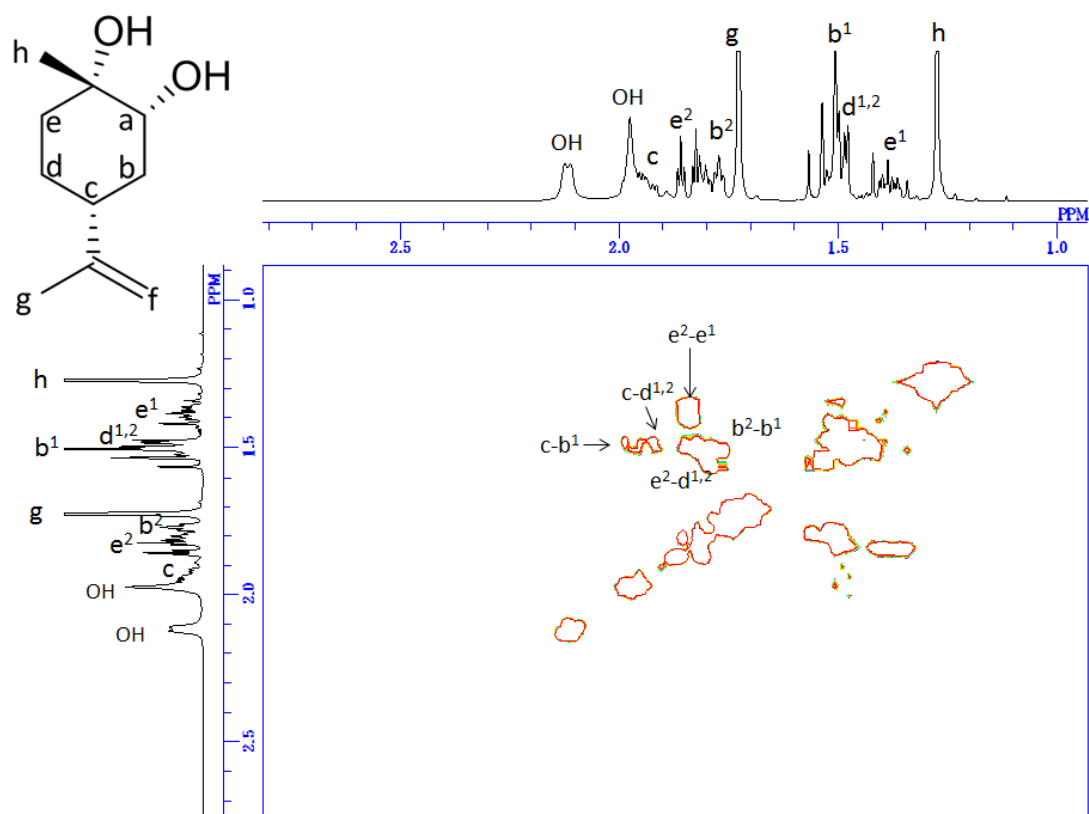

$^1\text{H}$ - $^1\text{H}$  COSY spectra of **2a** in  $\text{CDCl}_3$ ; selected range with (top) high sensitivity and (bottom) low sensitivity.

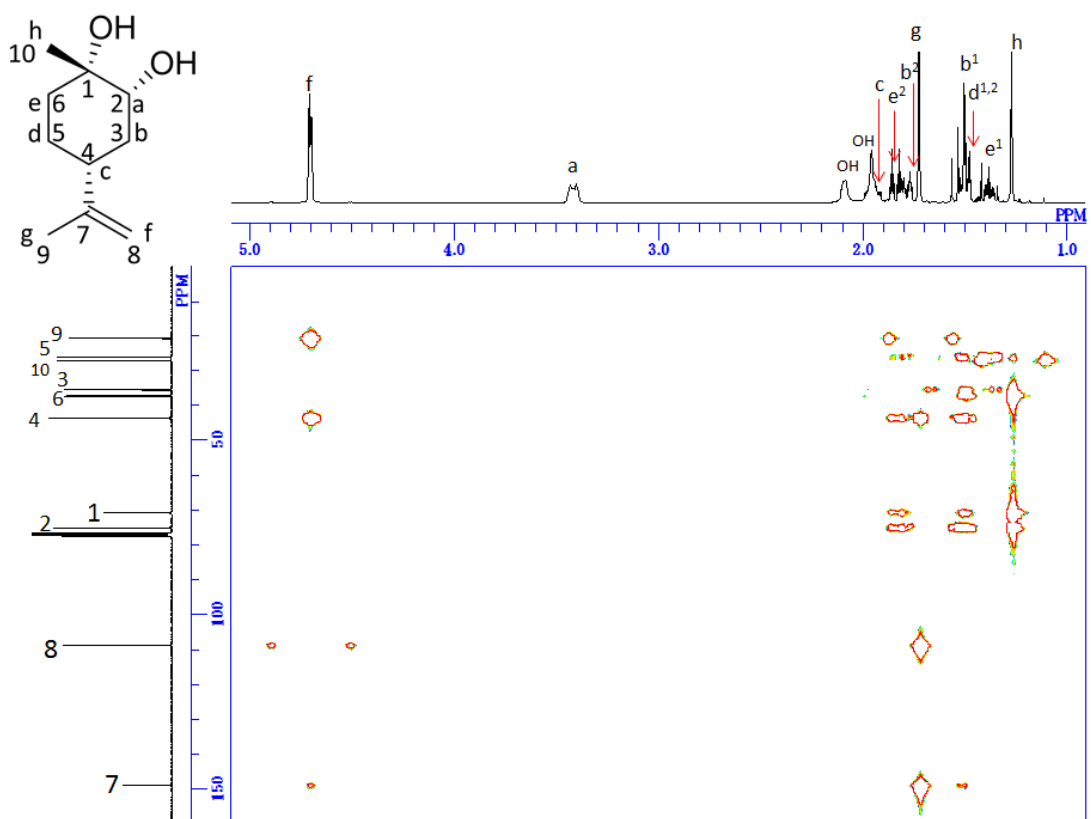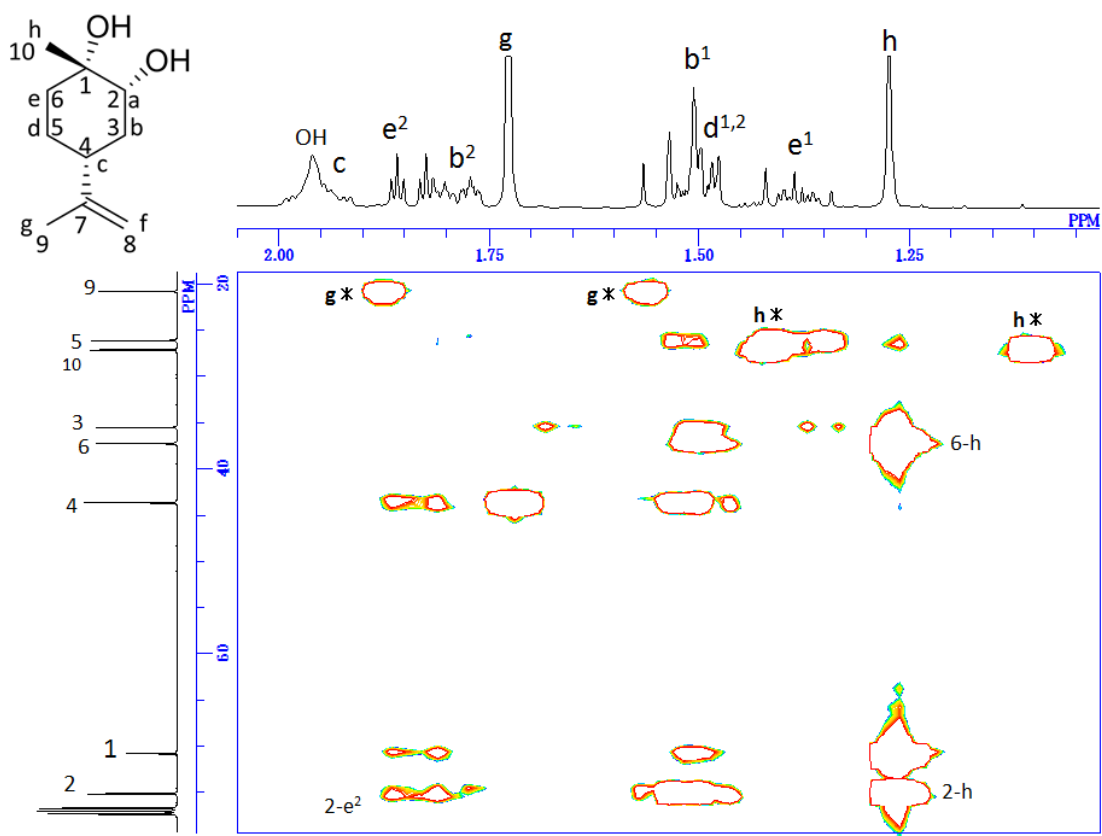

HMBC spectra of **2a** in CDCl<sub>3</sub>; (top) full range and (bottom) selected range. The marks (g\* and h\*) represent for side-band peaks.



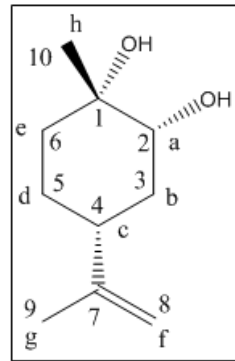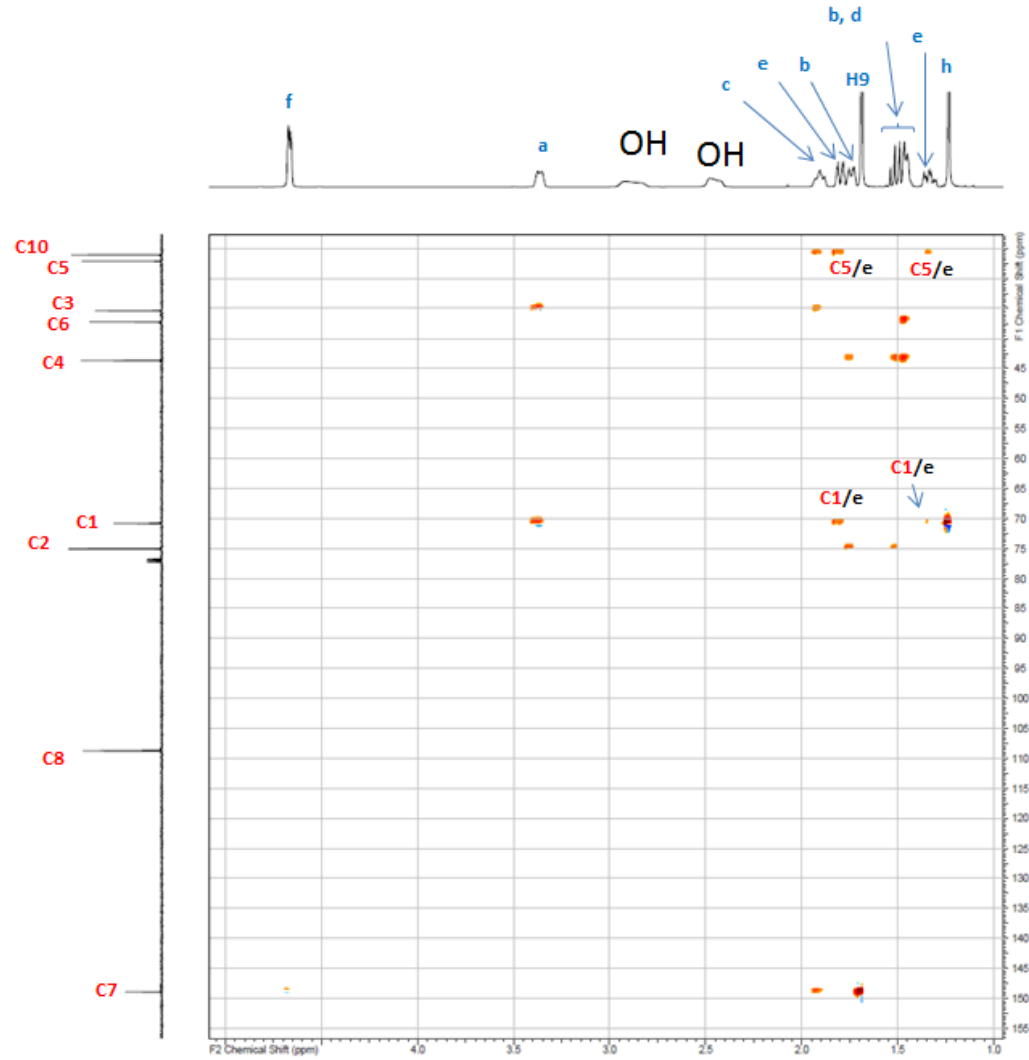

1,1-ADEQUATE spectrum of **2a** in  $\text{CDCl}_3$ .

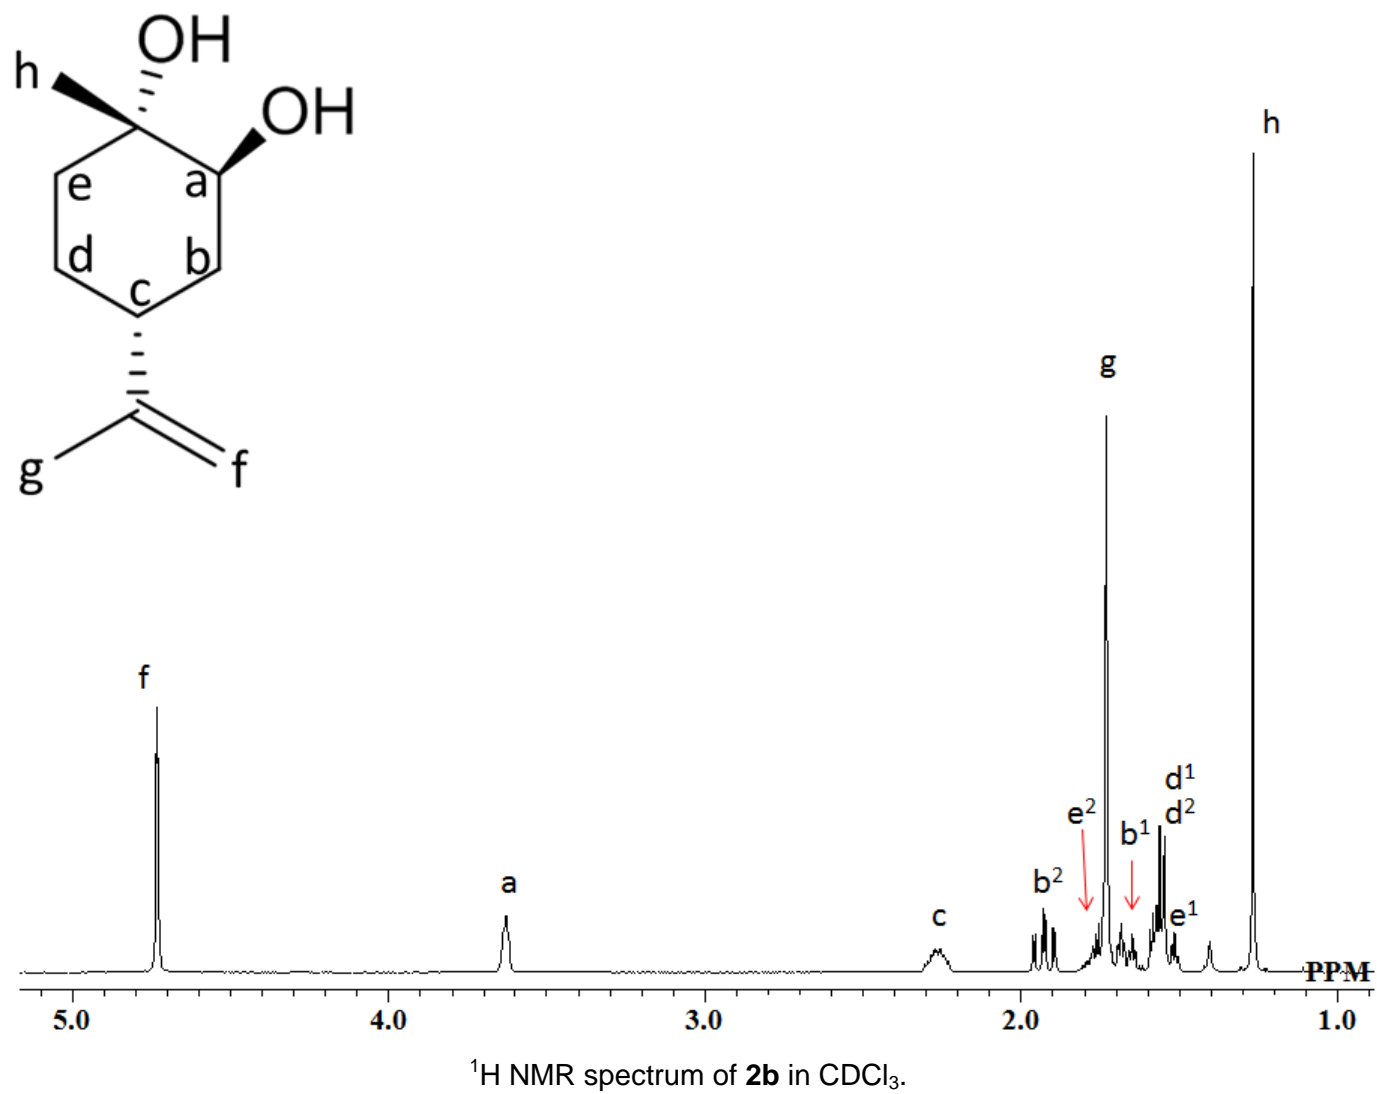

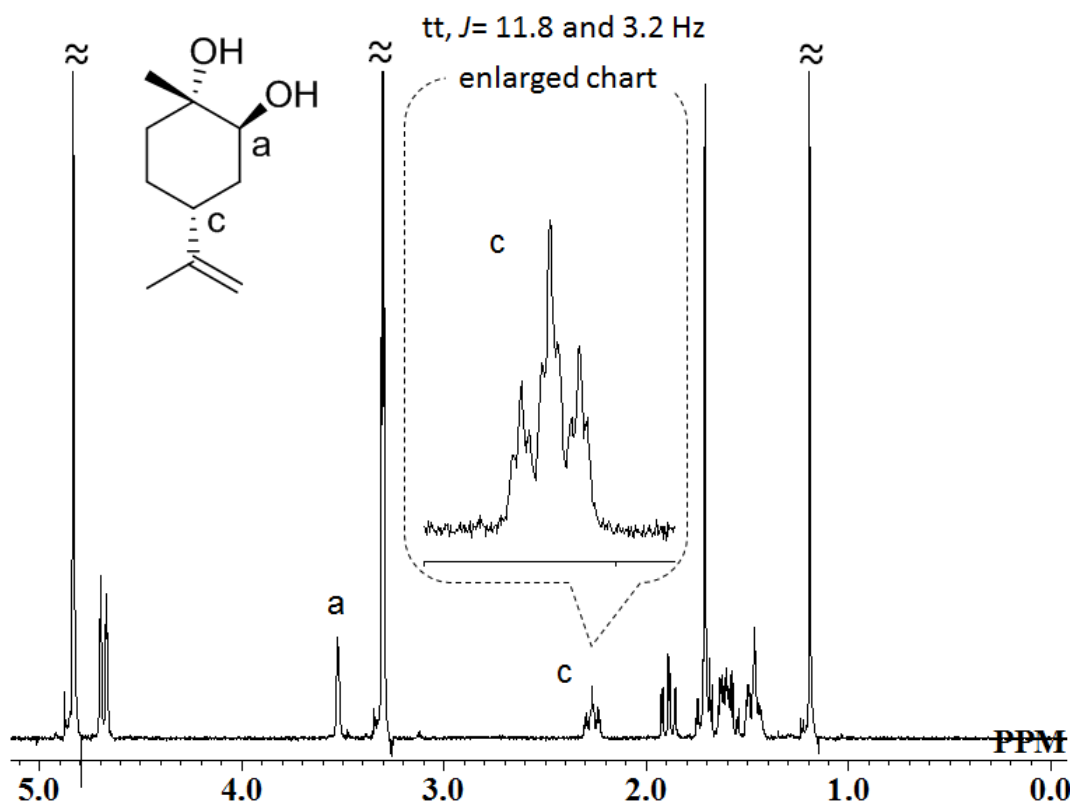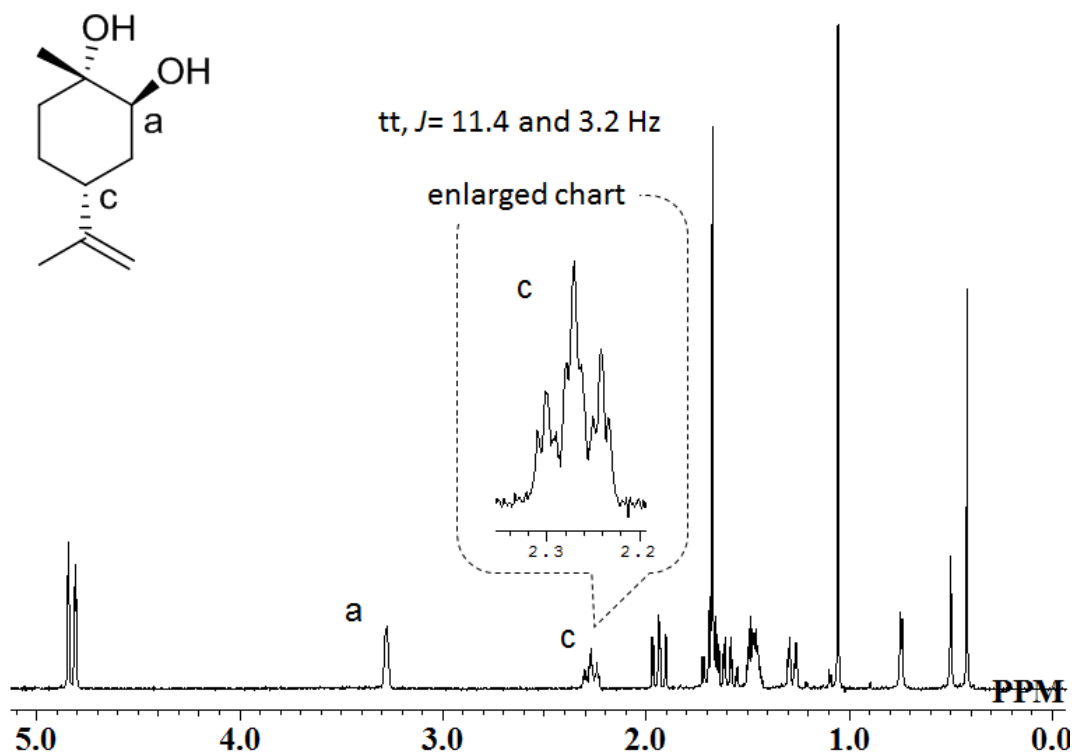

<sup>1</sup>H NMR spectra of **2b** (top) in CD<sub>3</sub>OD and (bottom) in benzene-*d*<sub>6</sub>

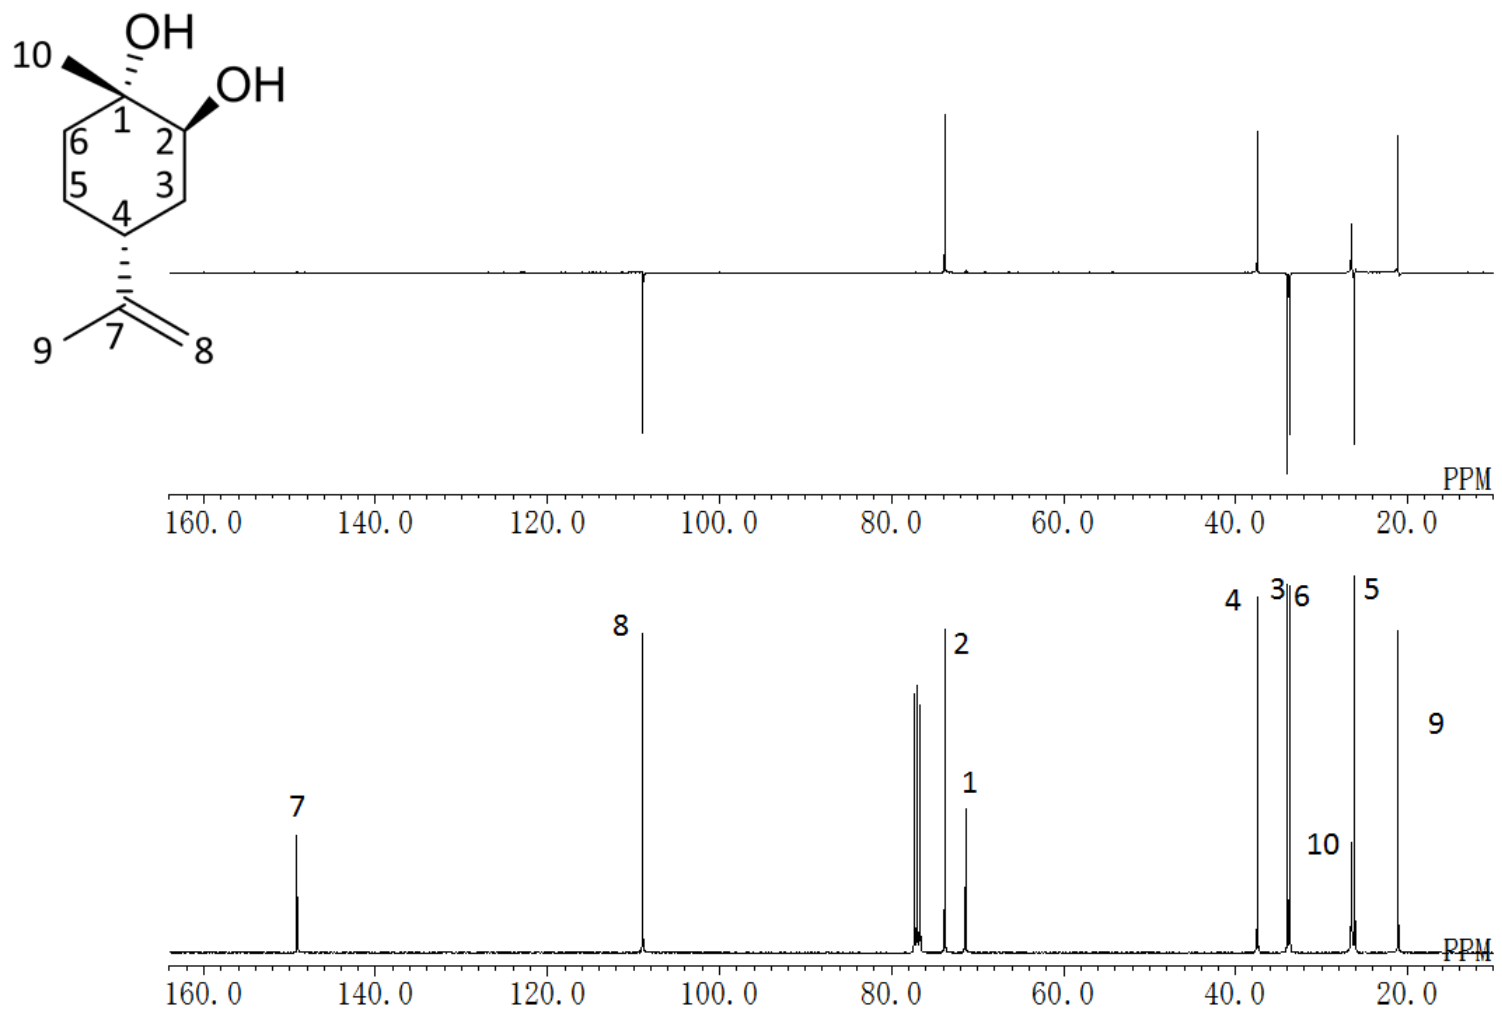

(top) DEPT135 and (bottom)  $^{13}\text{C}$  NMR spectra of **2b** in  $\text{CDCl}_3$ .

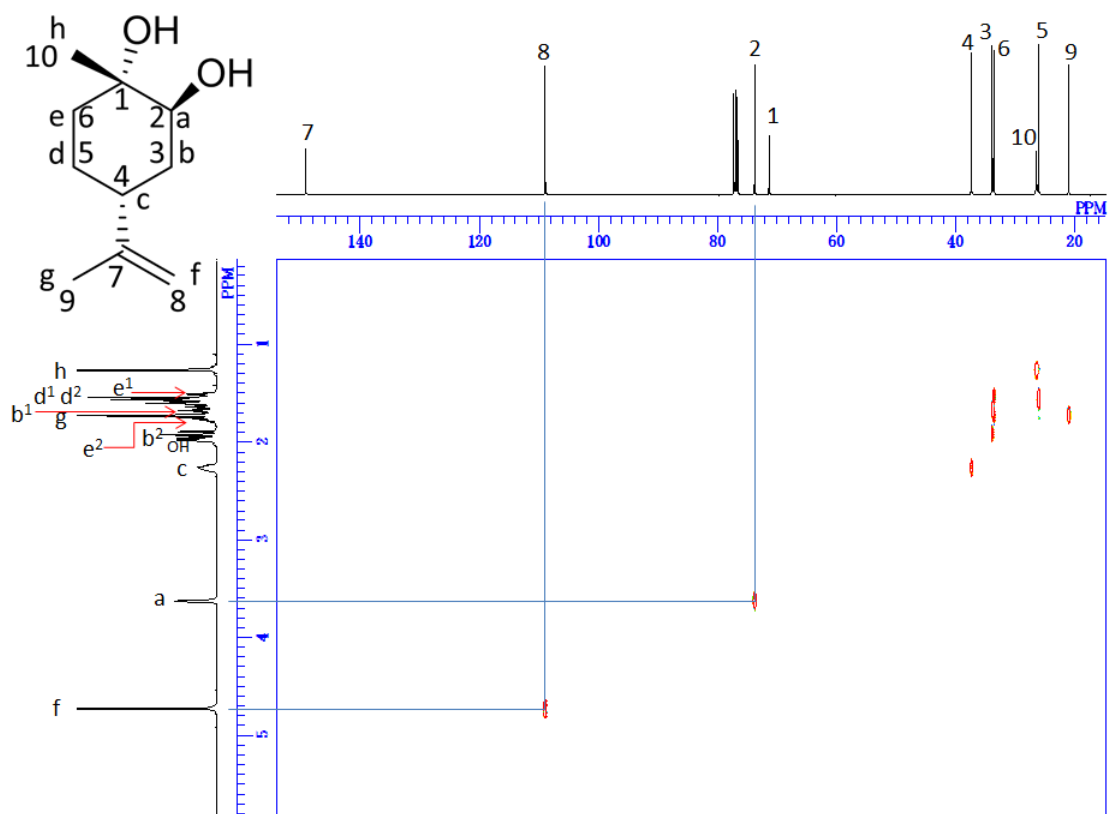

HETCOR spectra of **2b** in CDCl<sub>3</sub>; (top) full range and (bottom) selected range.

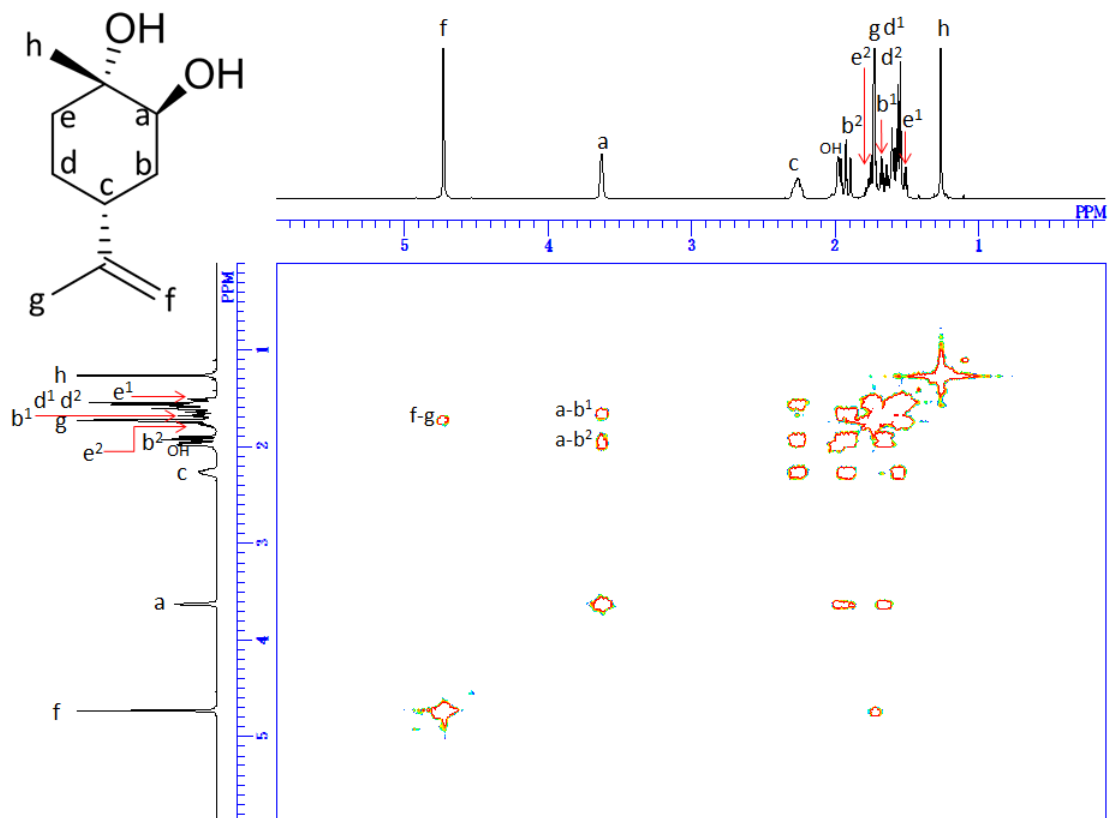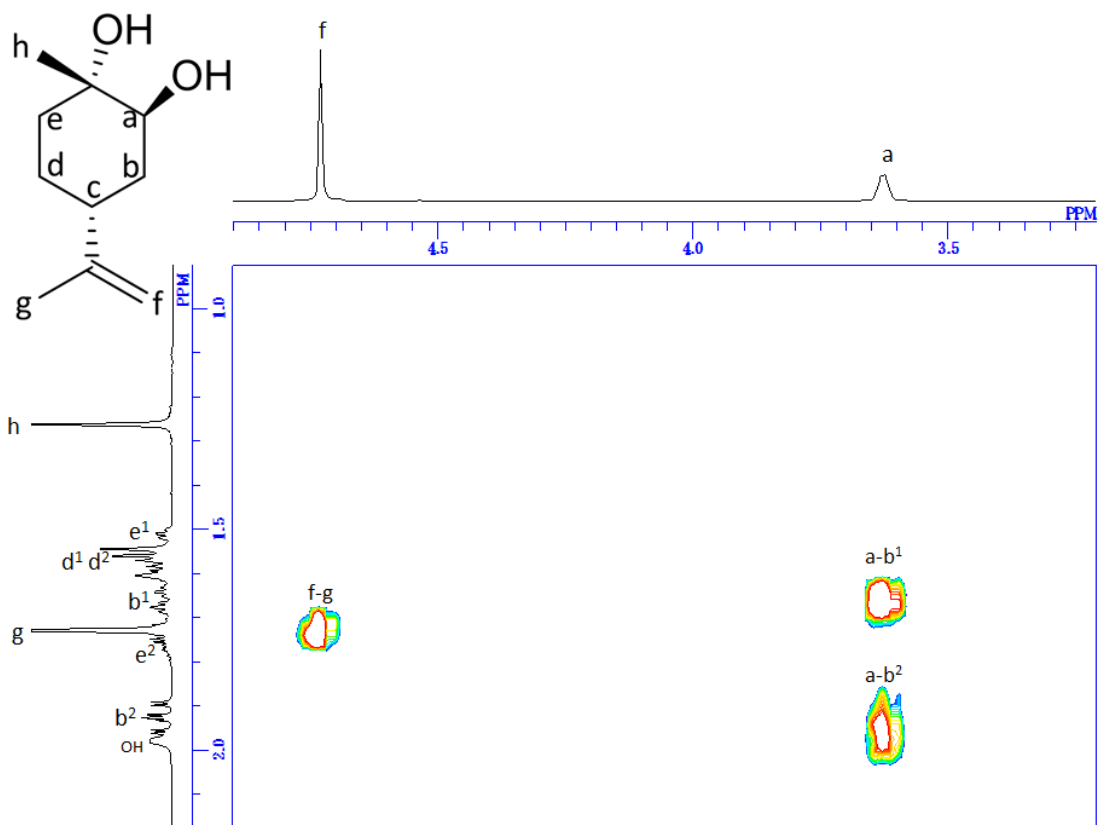

<sup>1</sup>H-<sup>1</sup>H COSY spectra of **2b** in CDCl<sub>3</sub>; (top) full range and (bottom) selected range.

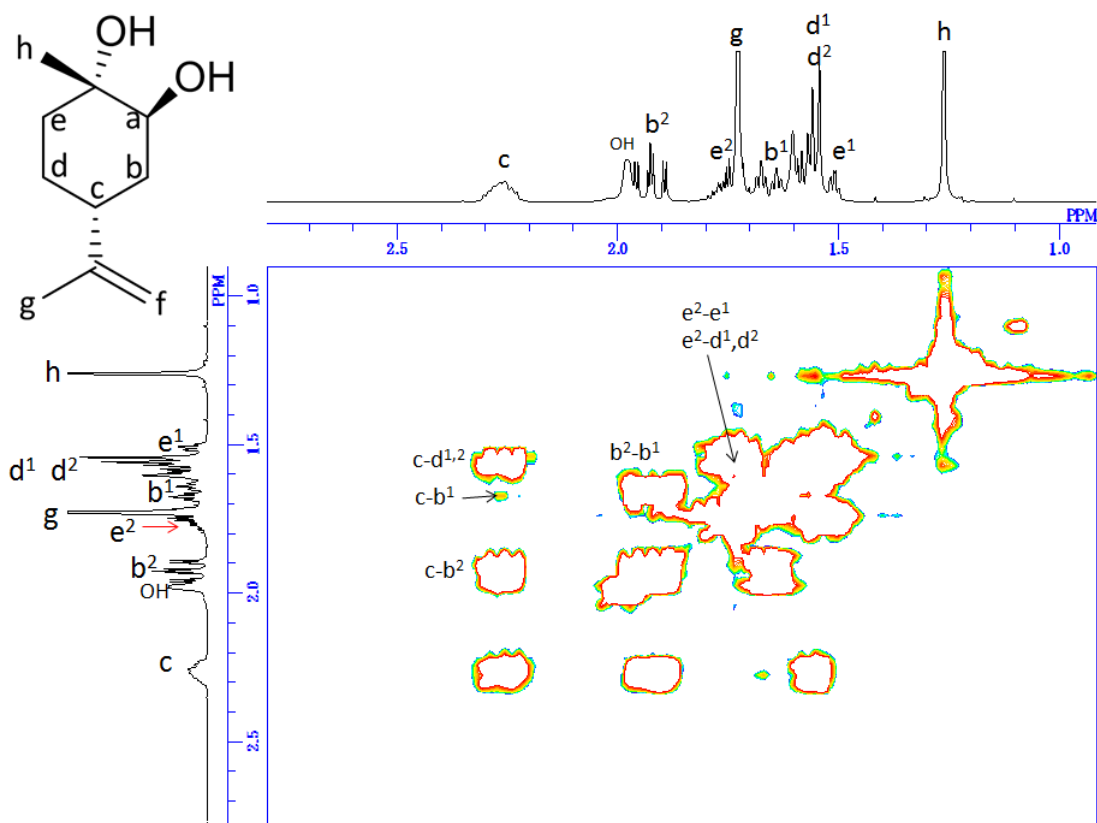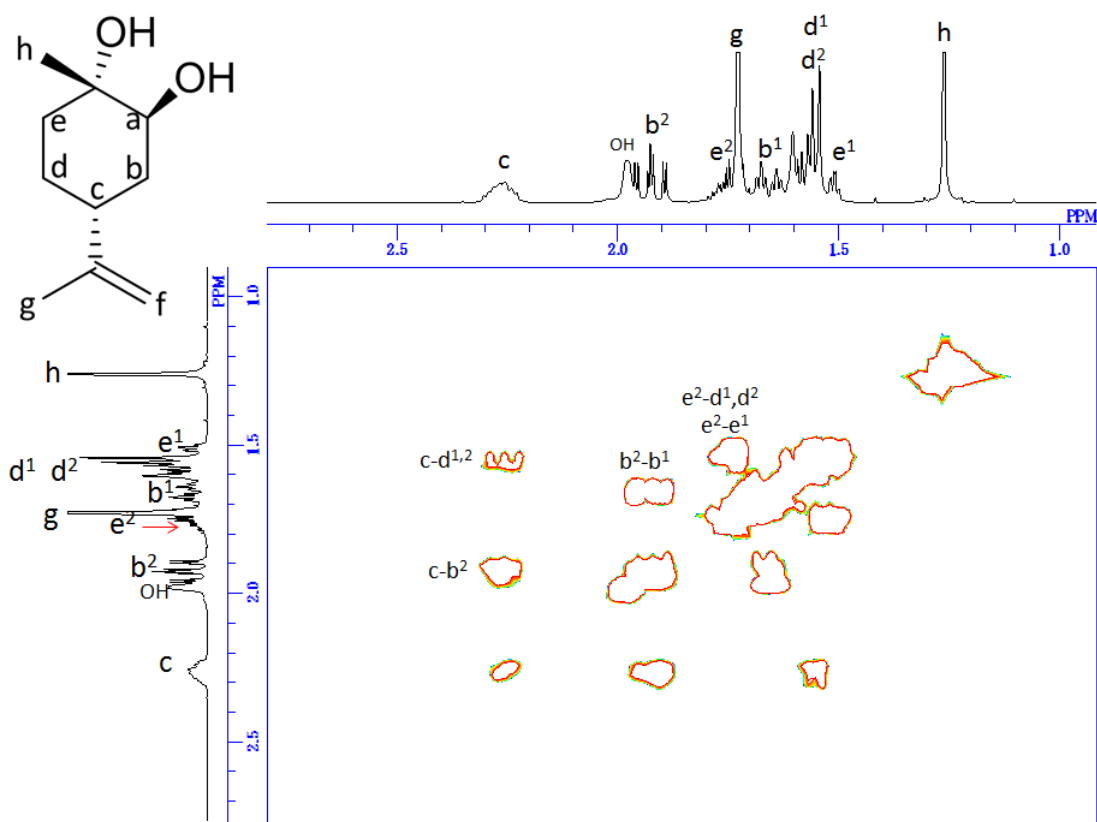

$^1\text{H}$ - $^1\text{H}$  COSY spectra of **2b** in  $\text{CDCl}_3$ ; selected range with (top) high sensitivity and (bottom) low sensitivity.

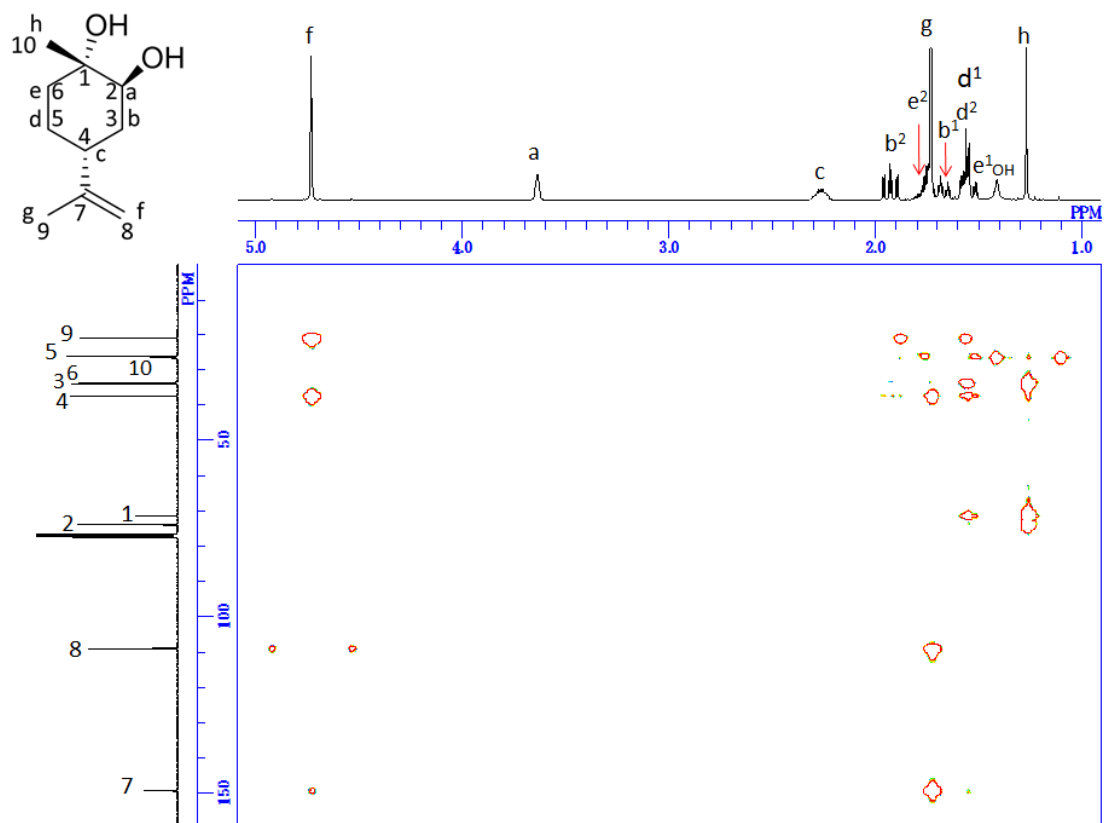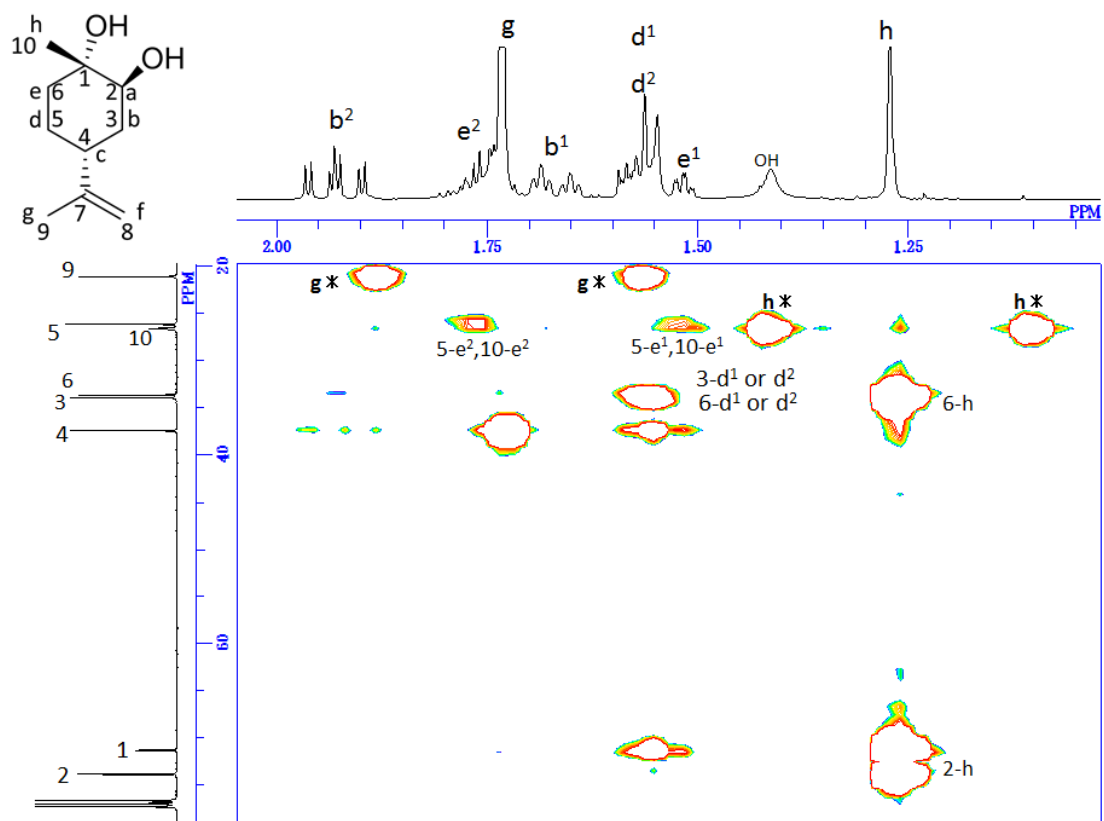

HMBC spectra of **2b** in CDCl<sub>3</sub>; (top) full range and (bottom) selected range. The marks (g\* and h\*) represent for side-band peaks.



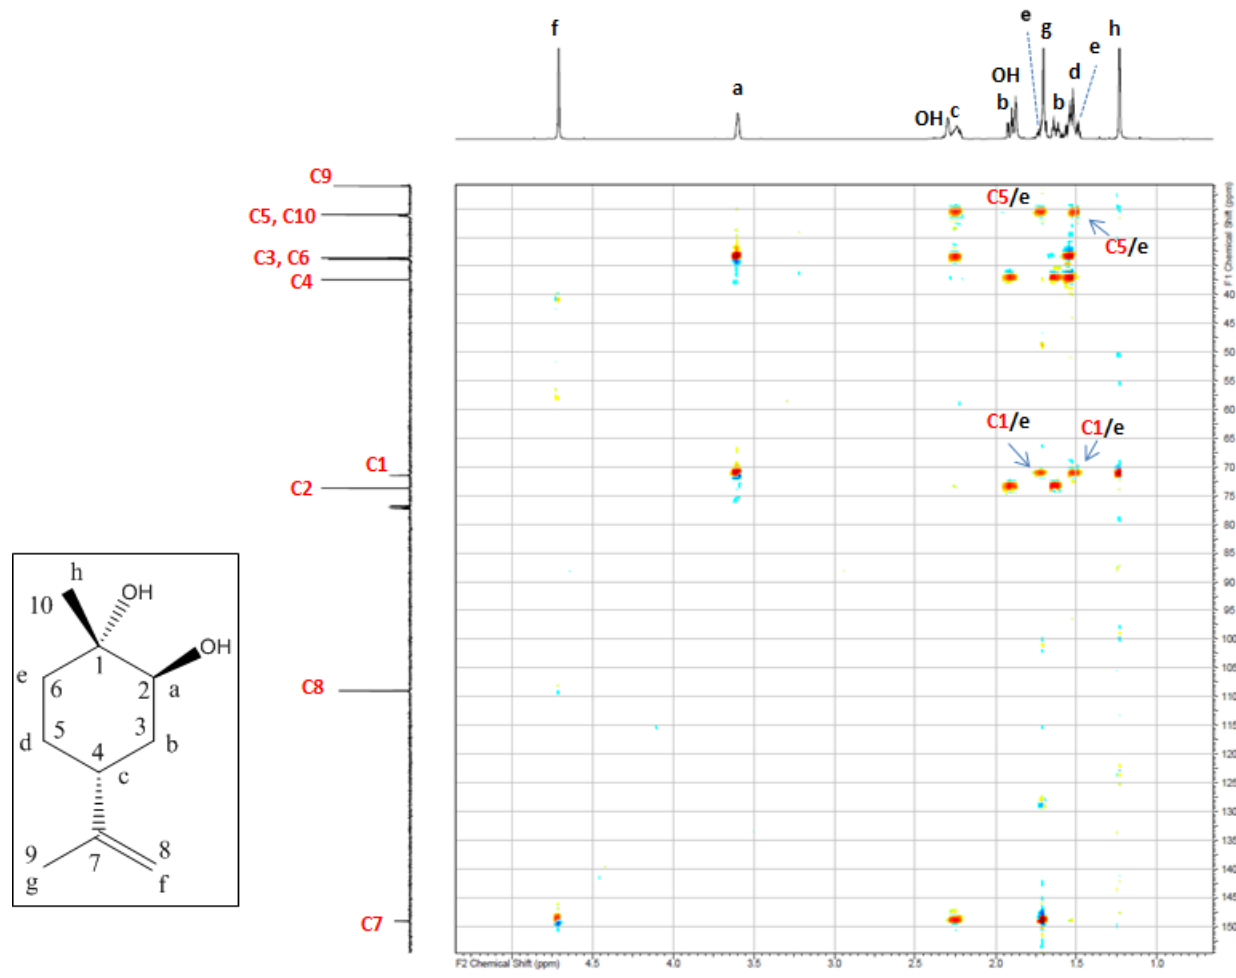

1,1-ADEQUATE spectrum of **2b** in CDCl<sub>3</sub>.

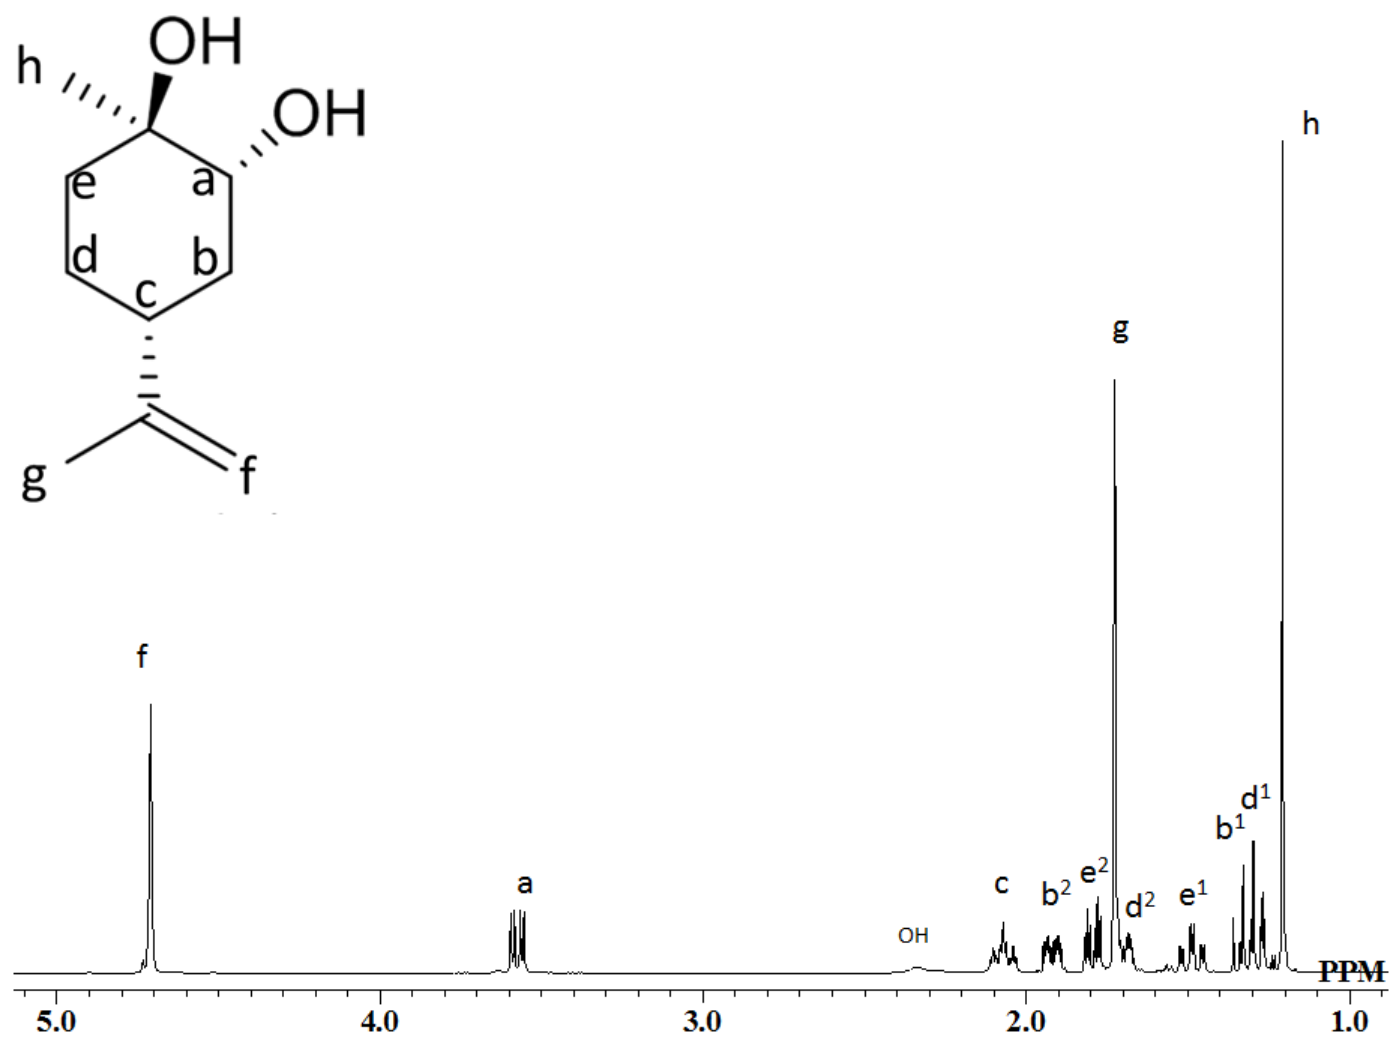

$^1\text{H}$  NMR spectrum of **2c** in  $\text{CDCl}_3$ .

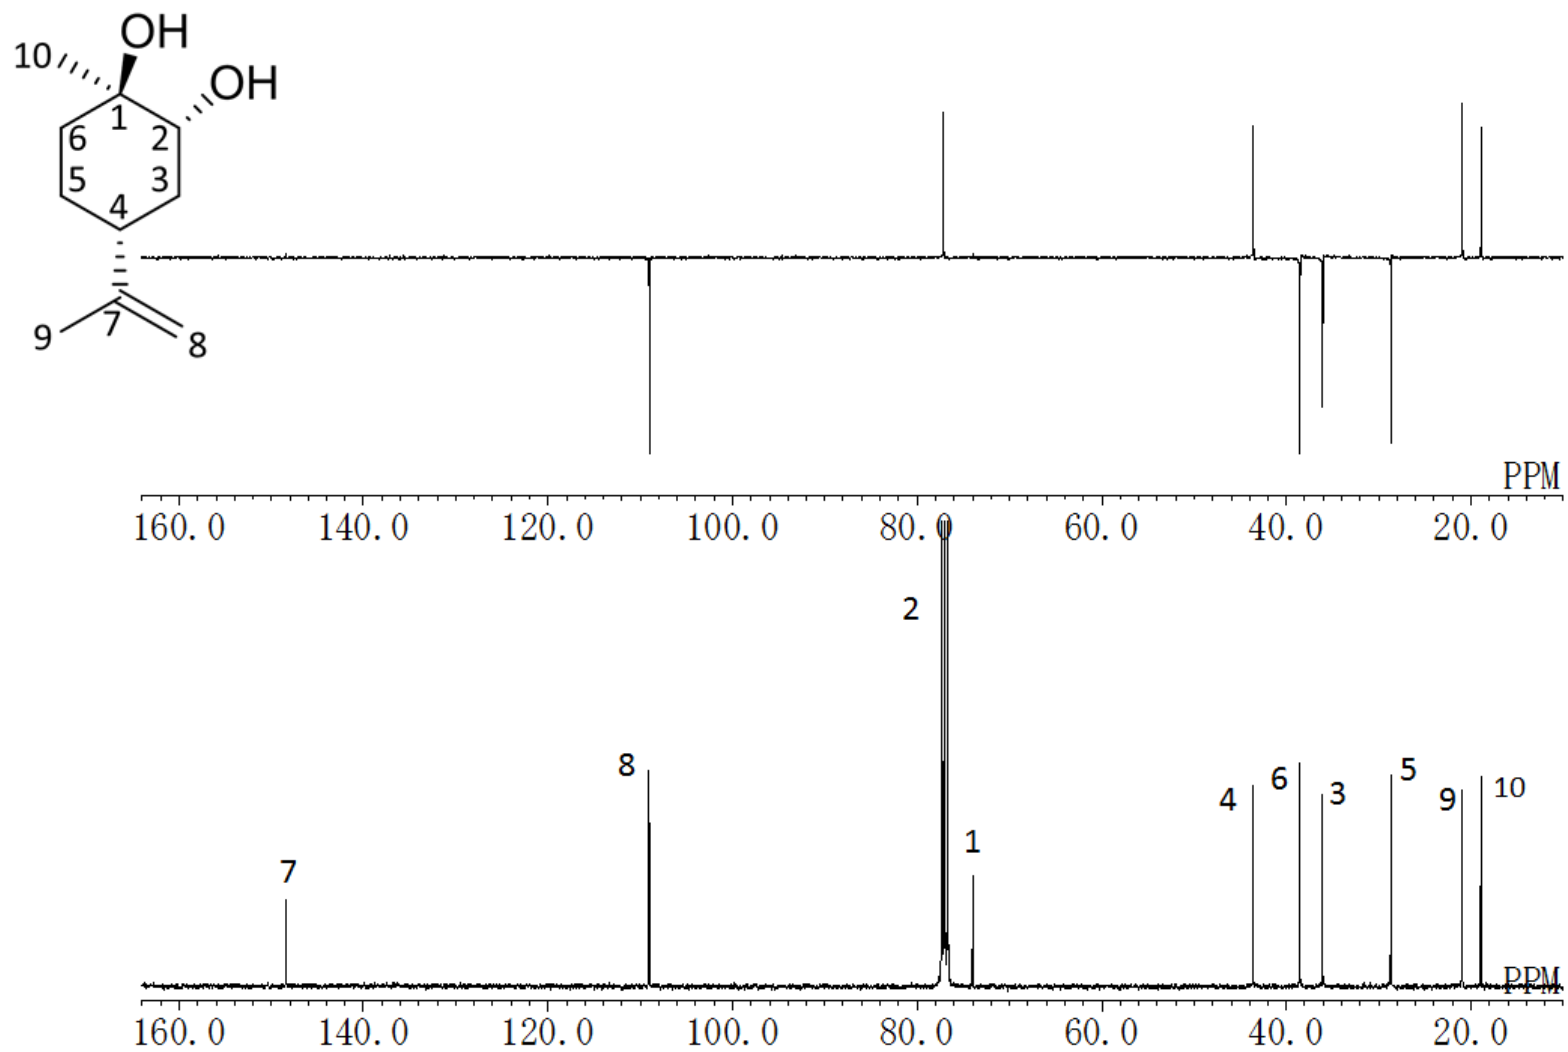

(top) DEPT135 and (bottom) <sup>13</sup>C NMR spectra of **2c** in CDCl<sub>3</sub>.

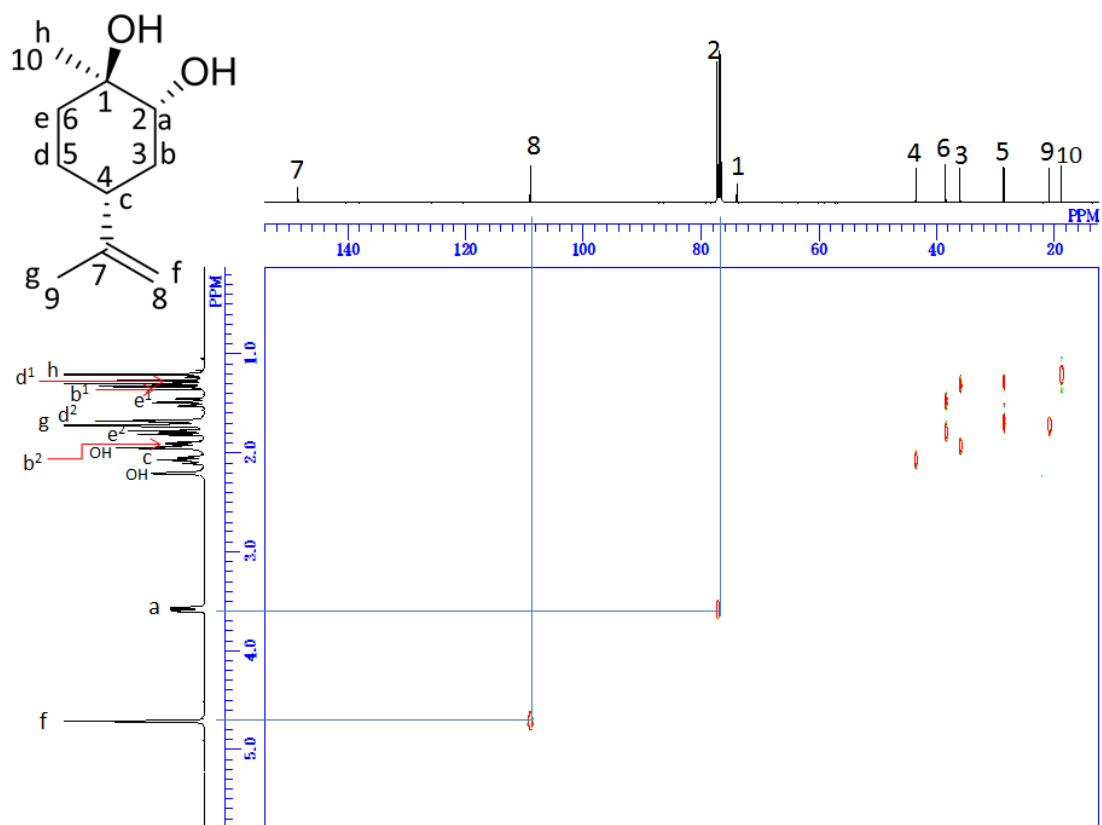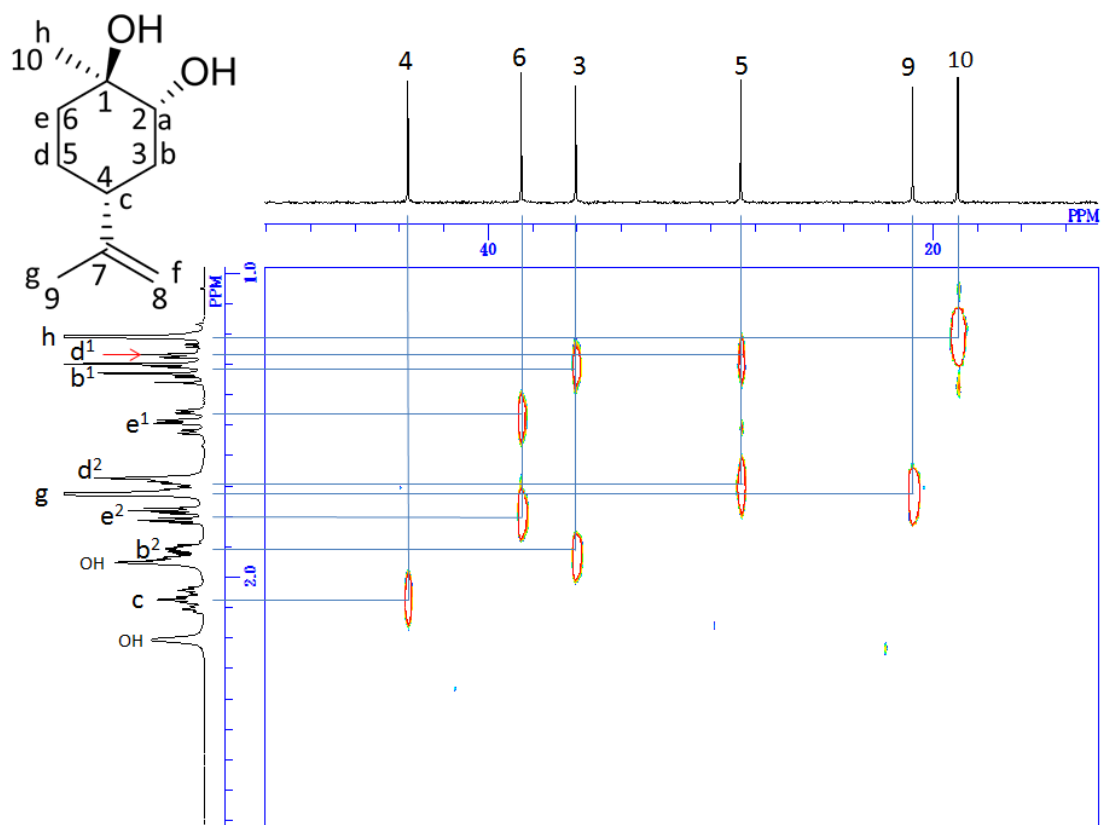

HETCOR spectra of **2c** in CDCl<sub>3</sub>; (top) full range and (bottom) selected range.

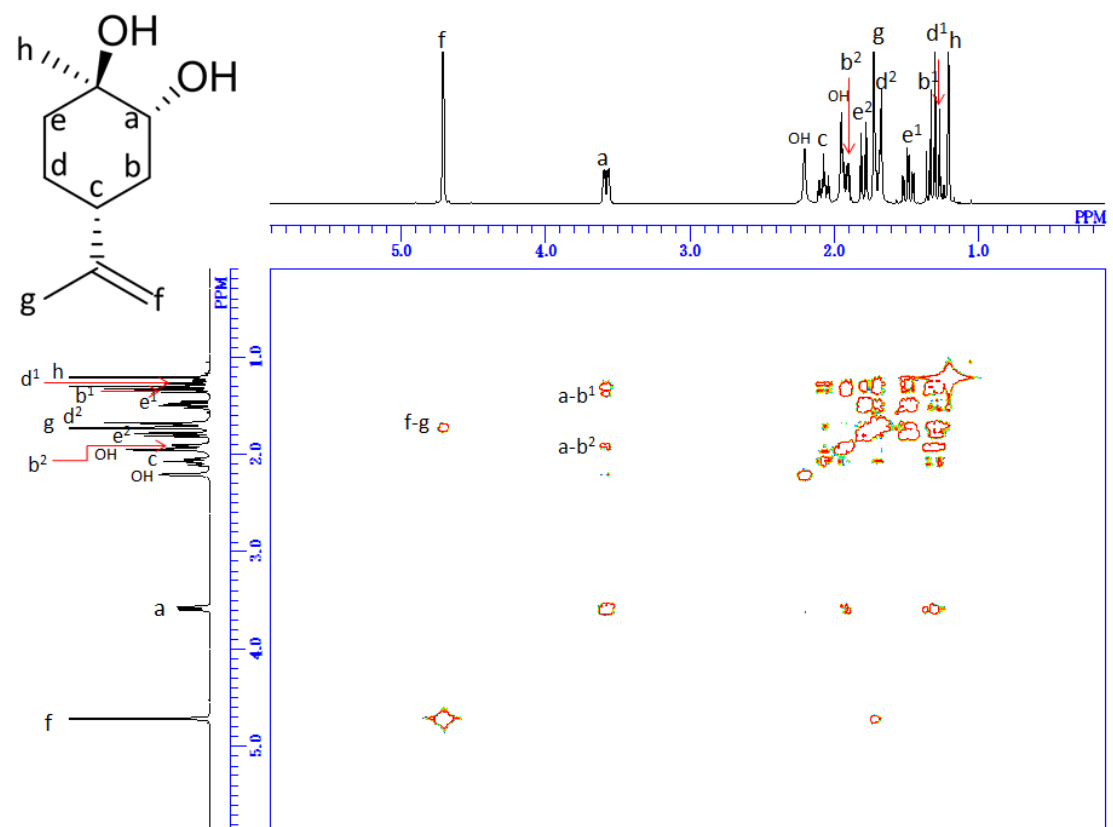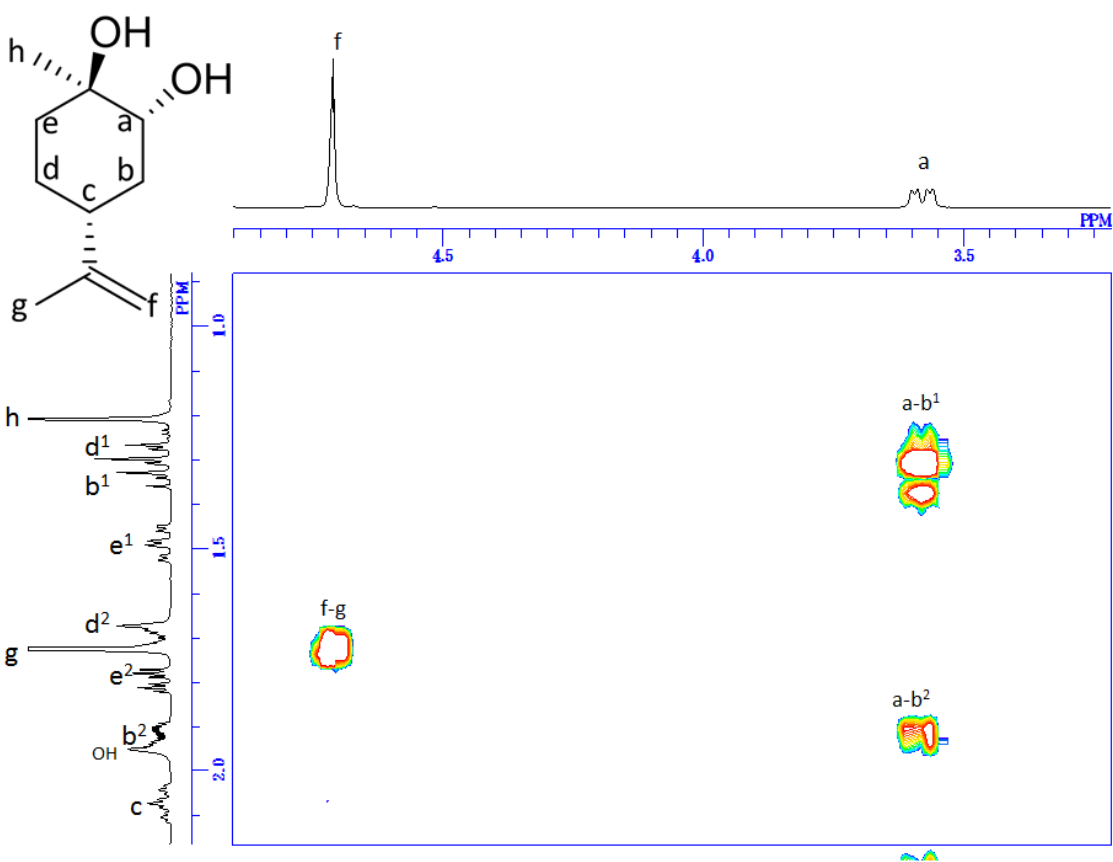

$^1\text{H}$ - $^1\text{H}$  COSY spectra of **2c** in  $\text{CDCl}_3$ ; (top) full range and (bottom) selected range.

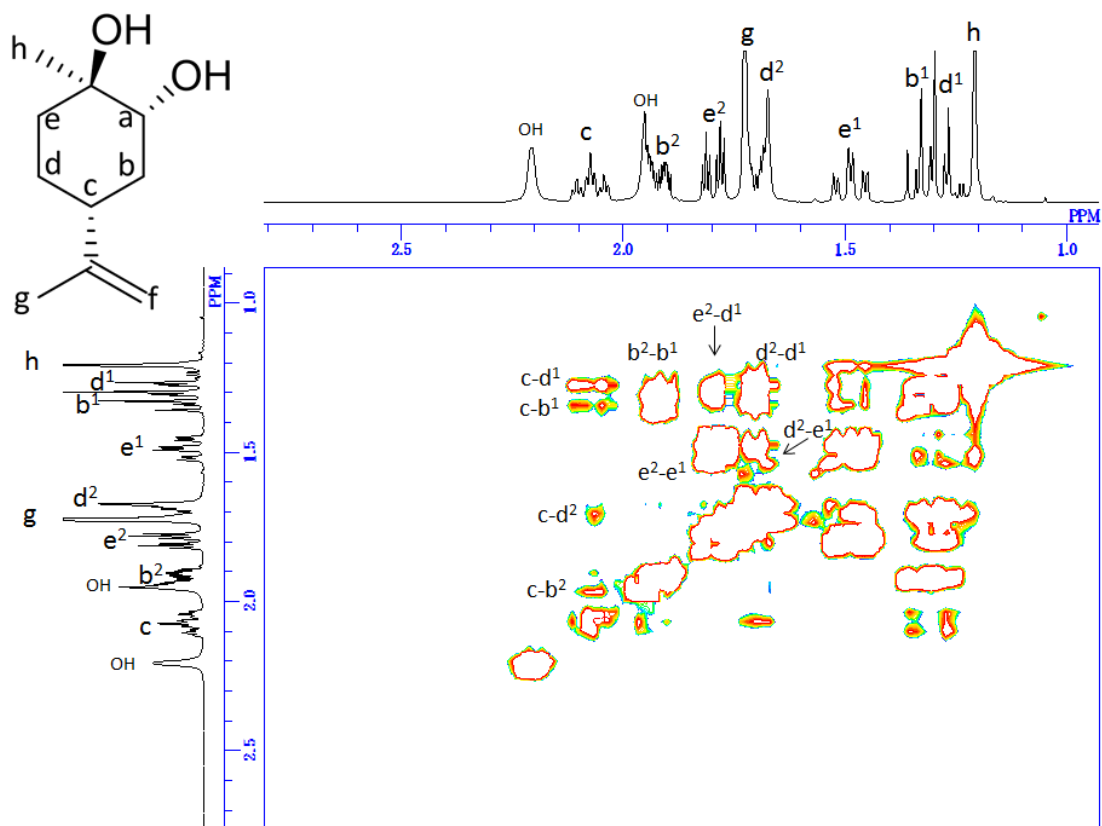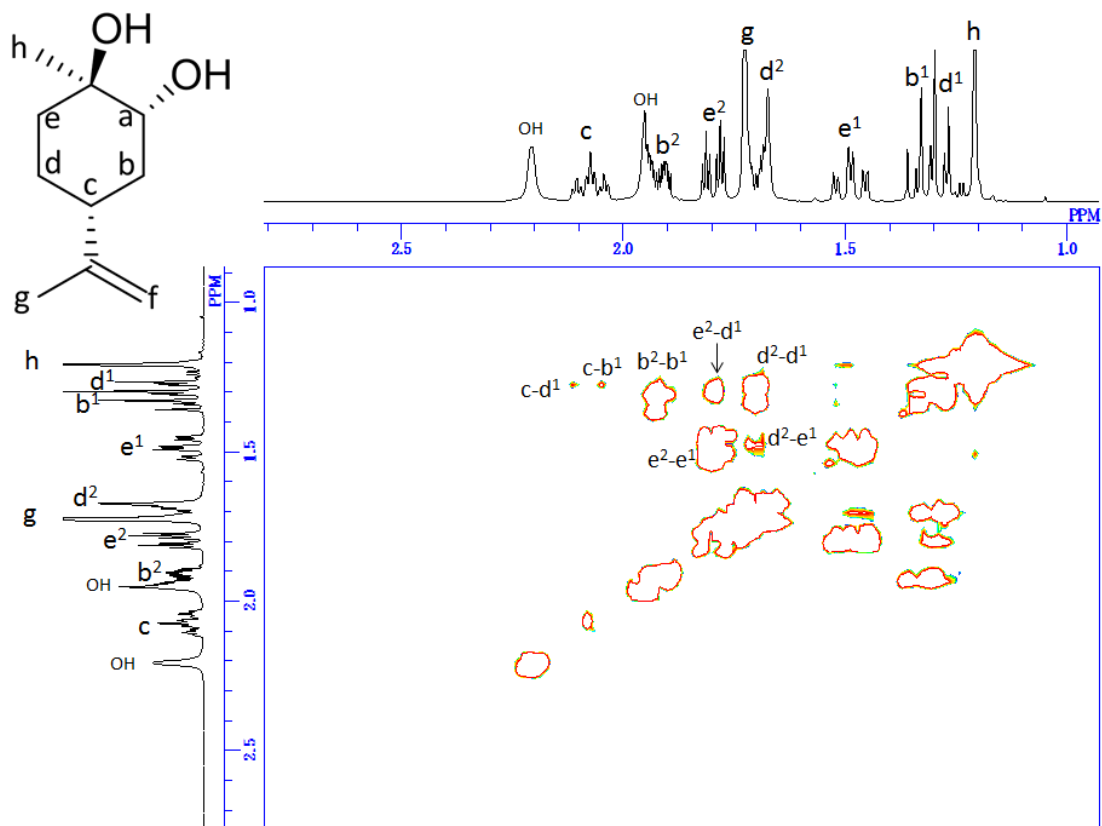

$^1\text{H}$ - $^1\text{H}$  COSY spectra of **2c** in  $\text{CDCl}_3$ ; selected range with (top) high sensitivity and (bottom) low sensitivity.

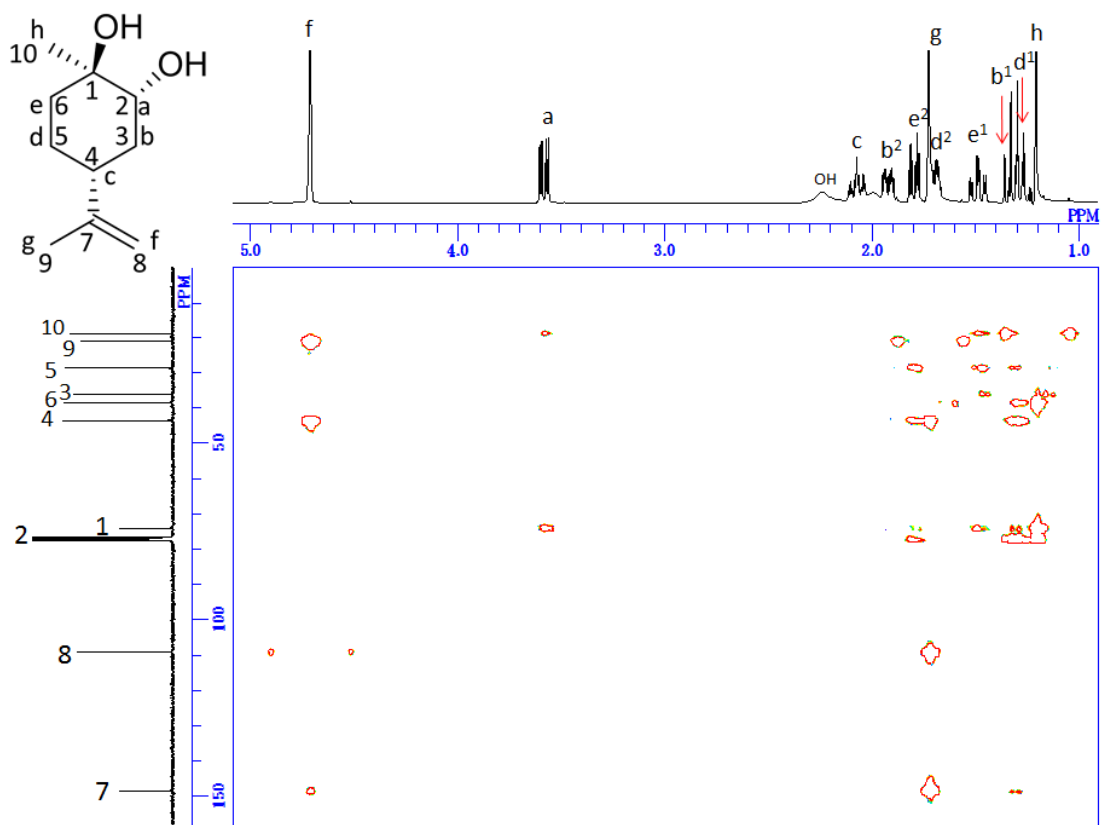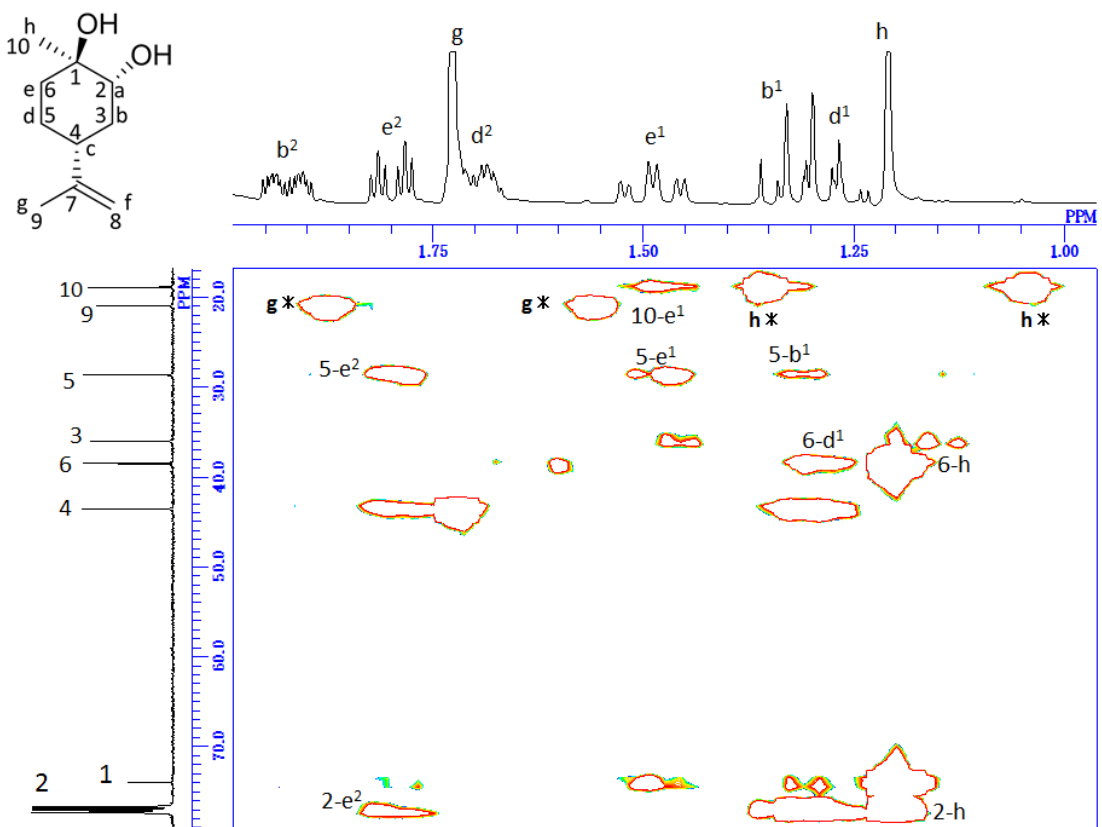

HMBC spectra of **2c** in  $\text{CDCl}_3$ ; (top) full range and (bottom) selected range. The marks ( $g^*$  and  $h^*$ ) represent for side-band peaks.

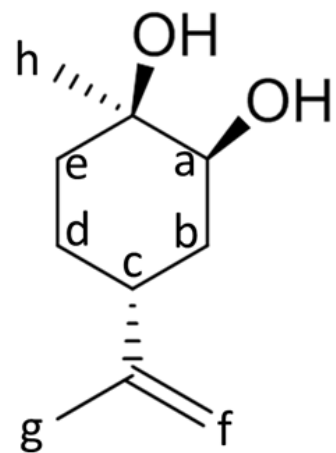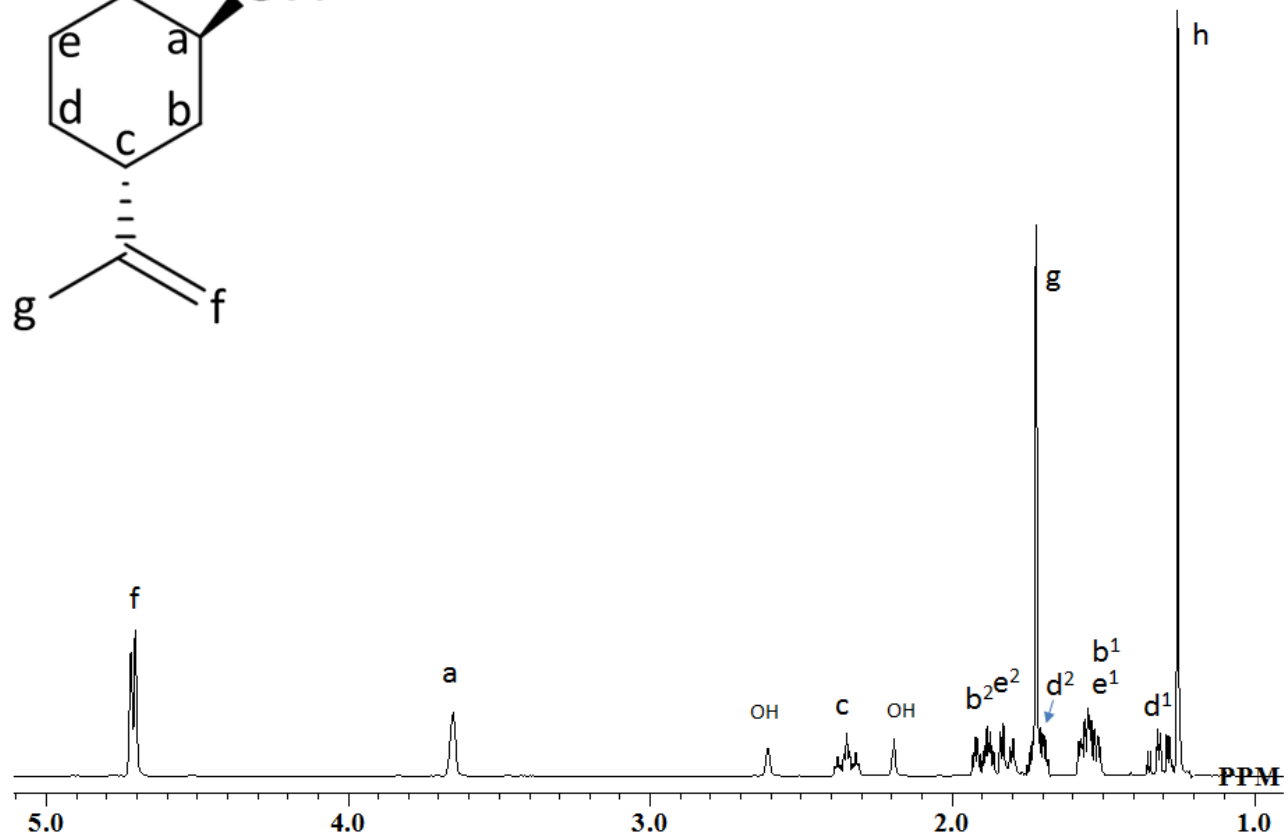

$^1\text{H}$  NMR spectrum of **2d** in  $\text{CDCl}_3$ .



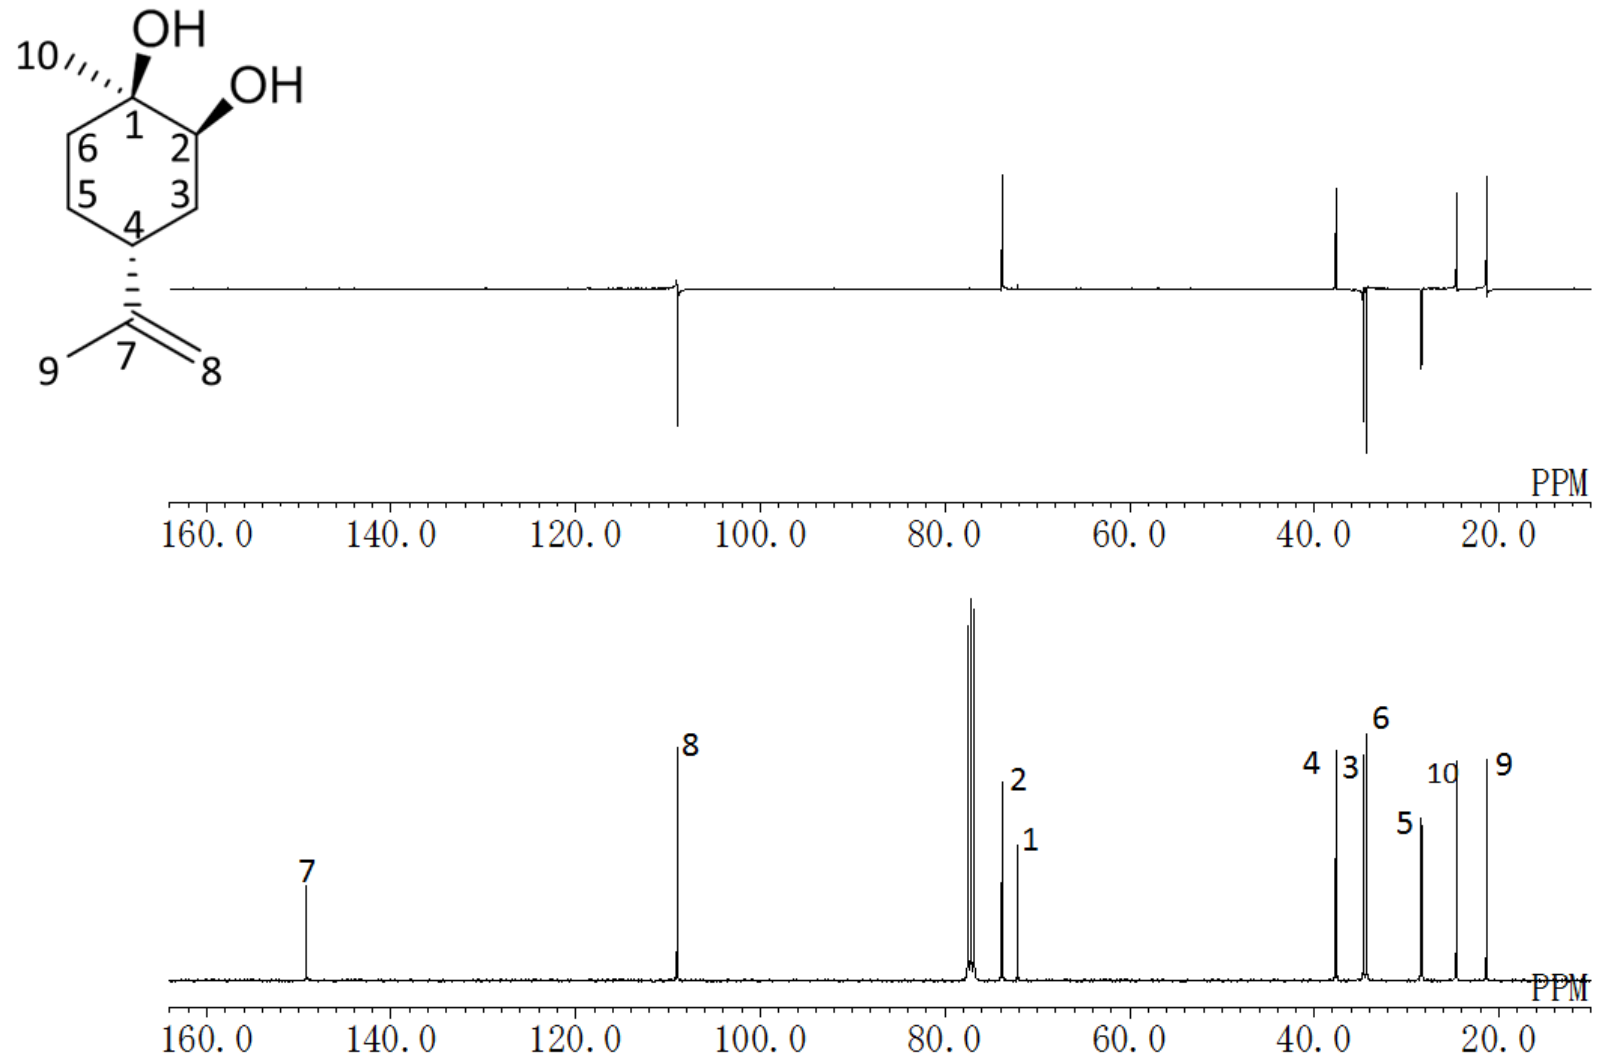

(top) DEPT135 and (bottom) <sup>13</sup>C NMR spectra of **2d** in CDCl<sub>3</sub>.

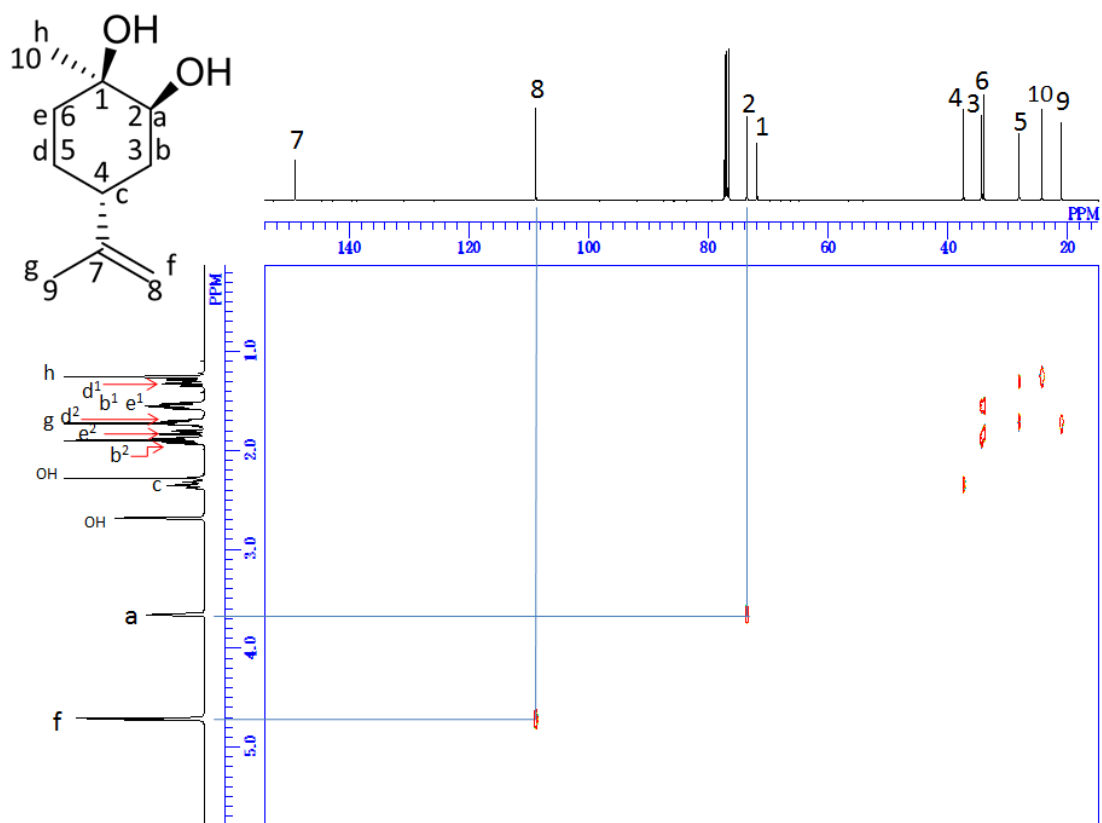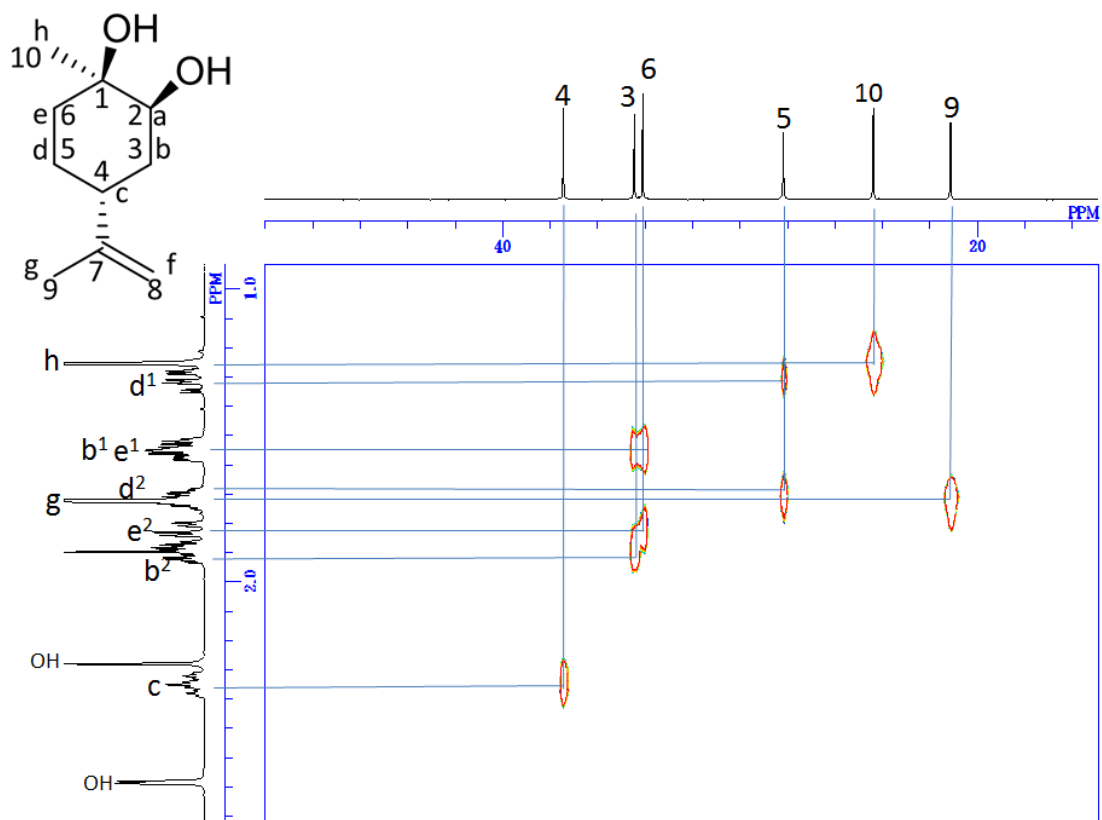

HETCOR spectra of **2d** in CDCl<sub>3</sub>; (top) full range and (bottom) selected range.

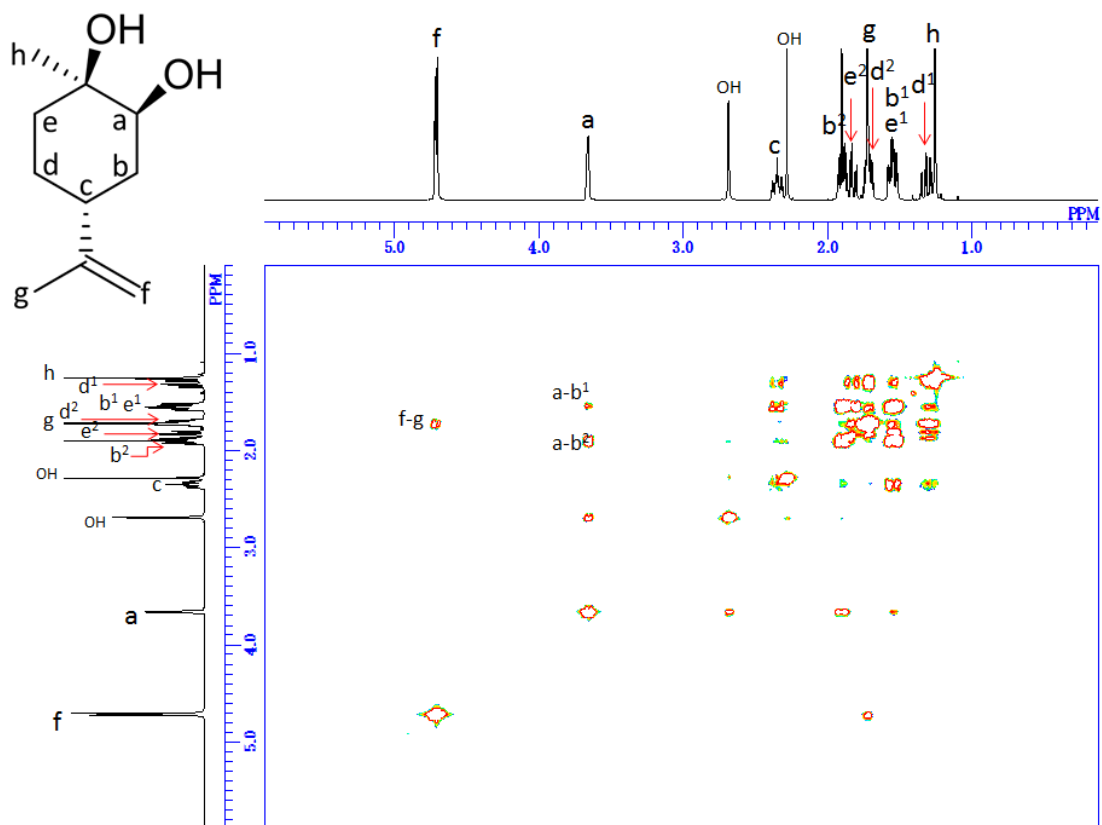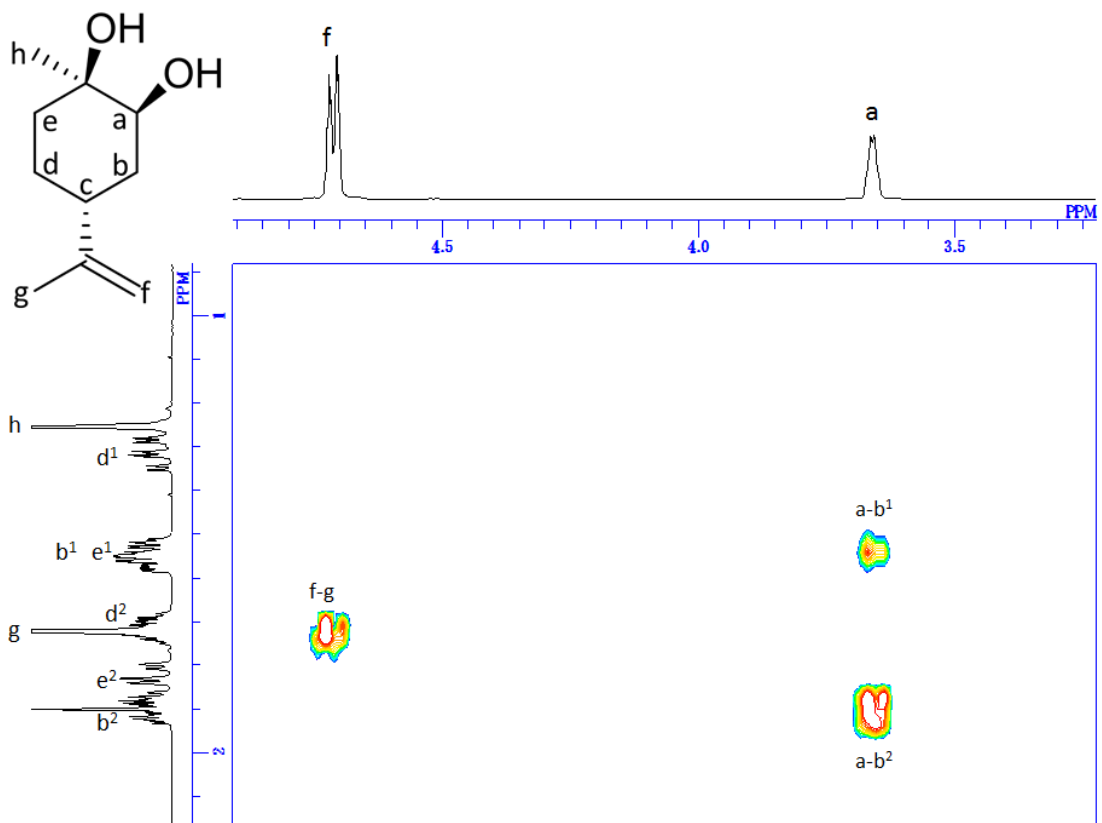

<sup>1</sup>H-<sup>1</sup>H COSY spectra of **2d** in CDCl<sub>3</sub>; (top) full range and (bottom) selected range.

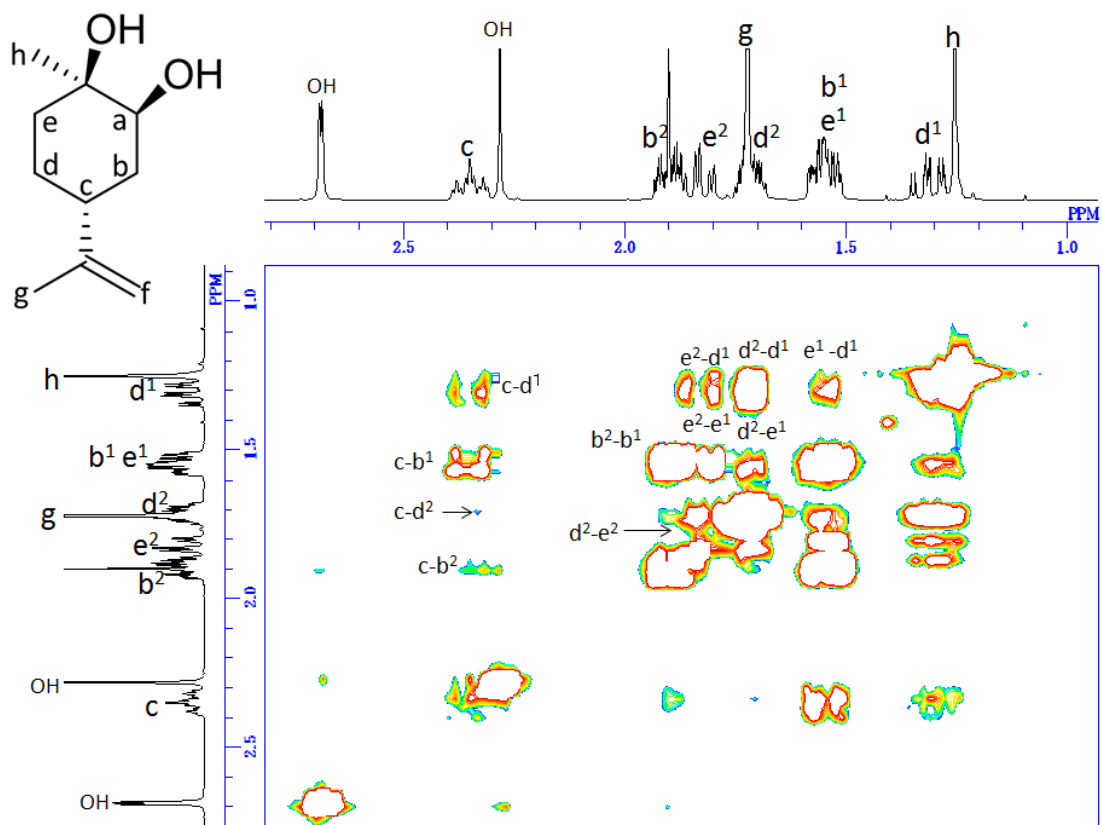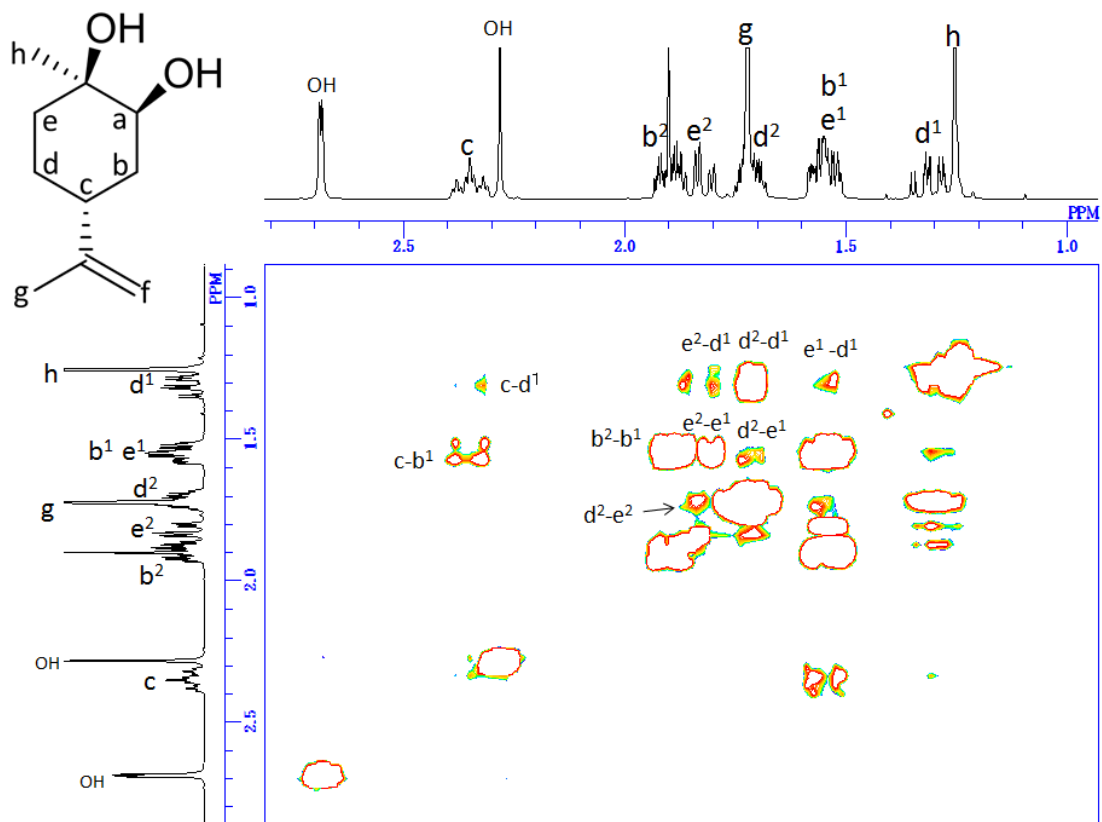

$^1\text{H}$ - $^1\text{H}$  COSY spectra of **2d** in  $\text{CDCl}_3$ ; selected range with (top) high sensitivity and (bottom) low sensitivity.

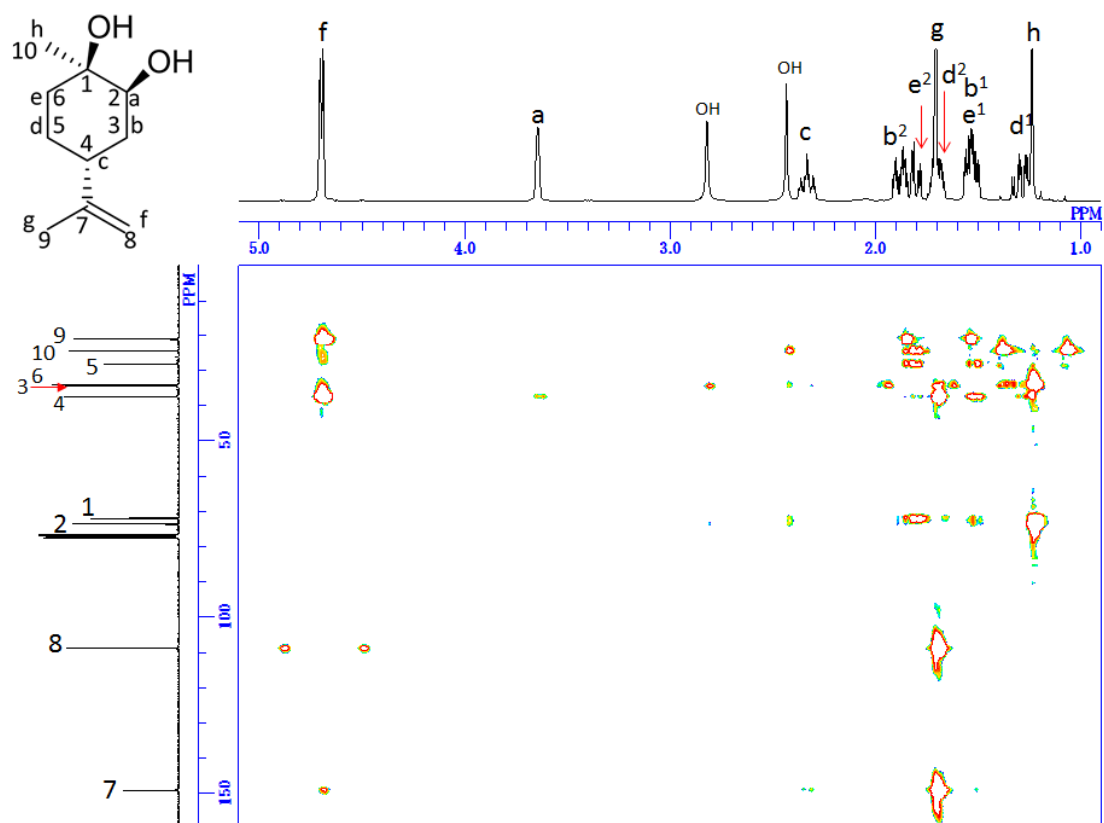

HMBC spectra of **2d** in  $\text{CDCl}_3$ ; (top) full range and (bottom) selected range. The marks (g\* and h\*) represent for side-band peak

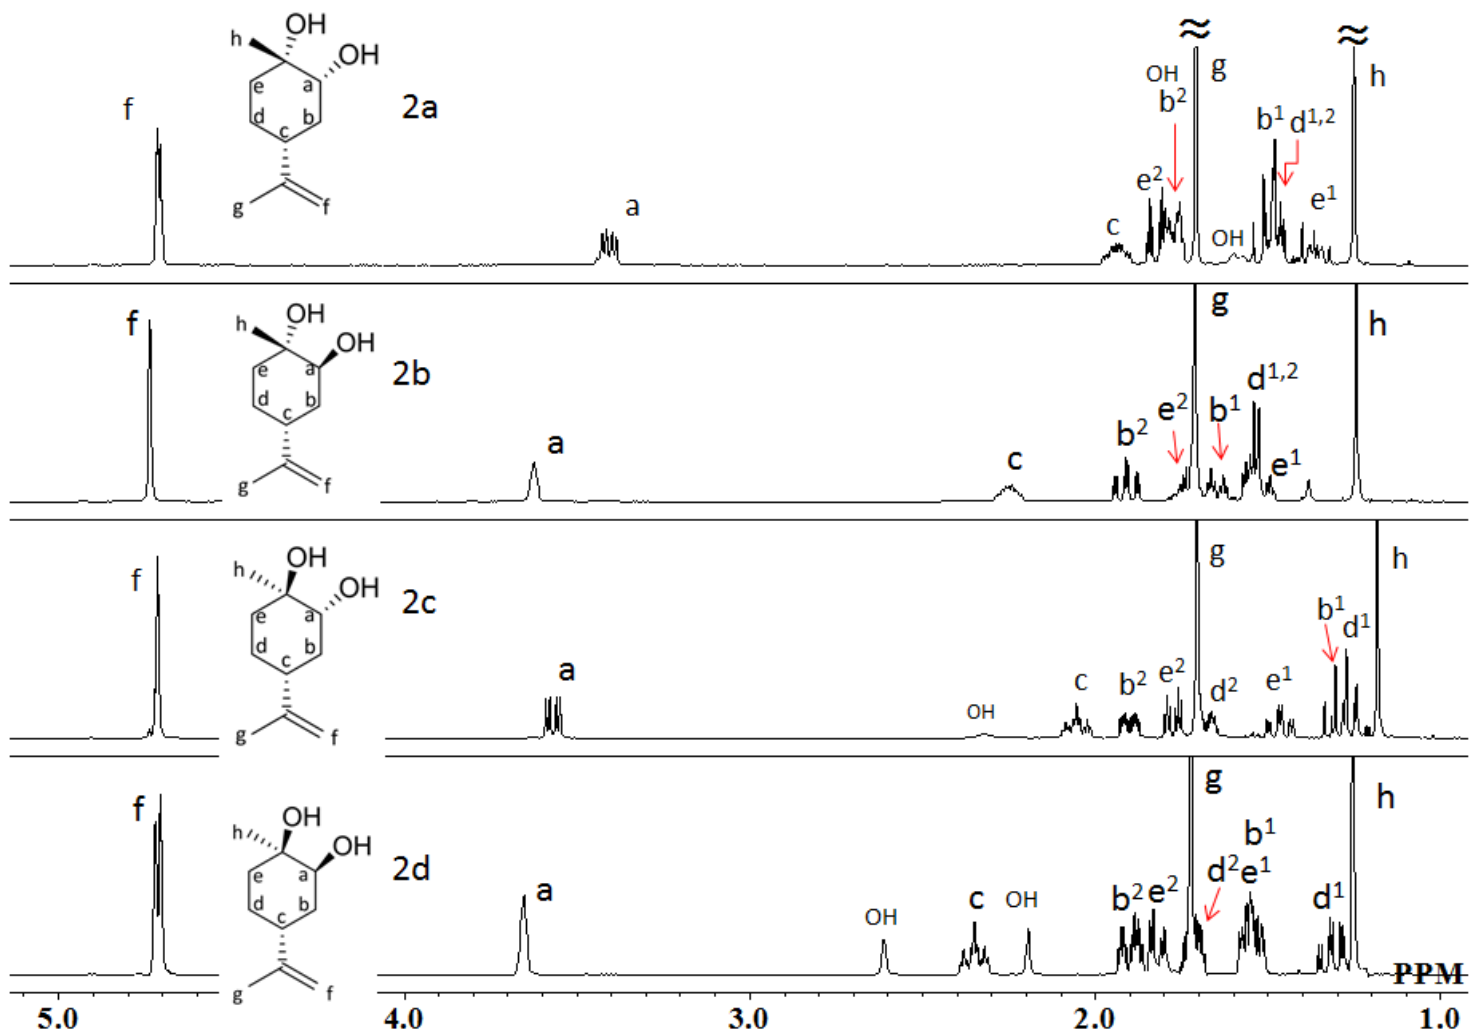

$^1\text{H}$  NMR spectra of four LMdiols (**2a–2d**) in full scales in  $\text{CDCl}_3$ .

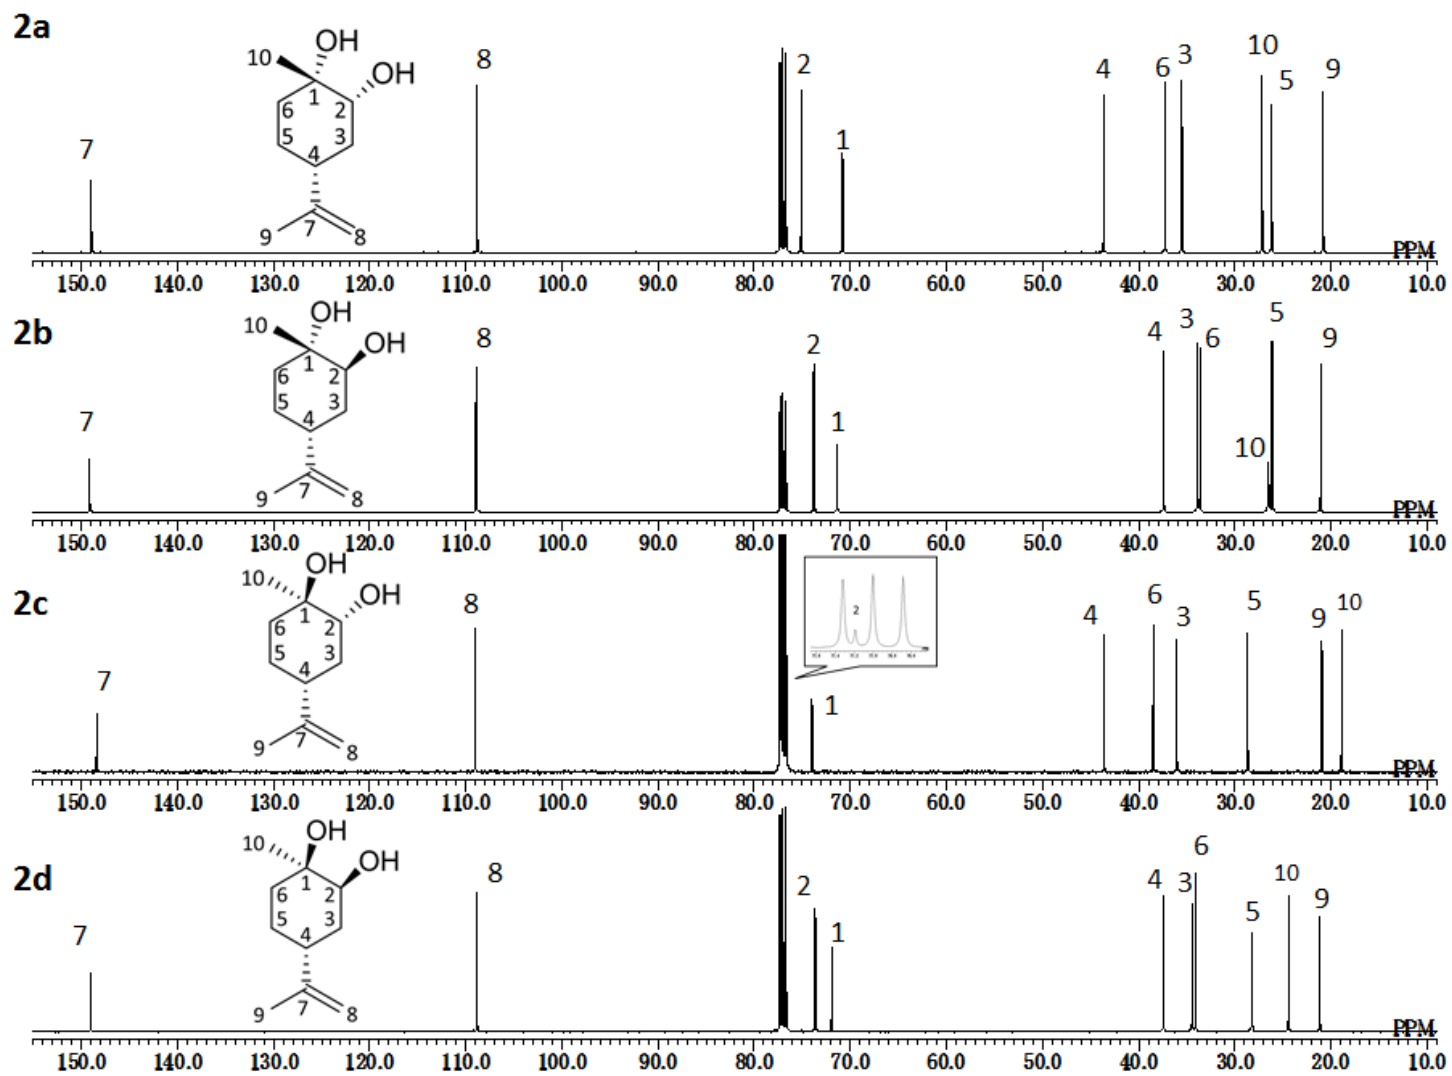

$^{13}\text{C}$  NMR spectra of four LMdiols (**2a–2d**) in full scales in  $\text{CDCl}_3$ .

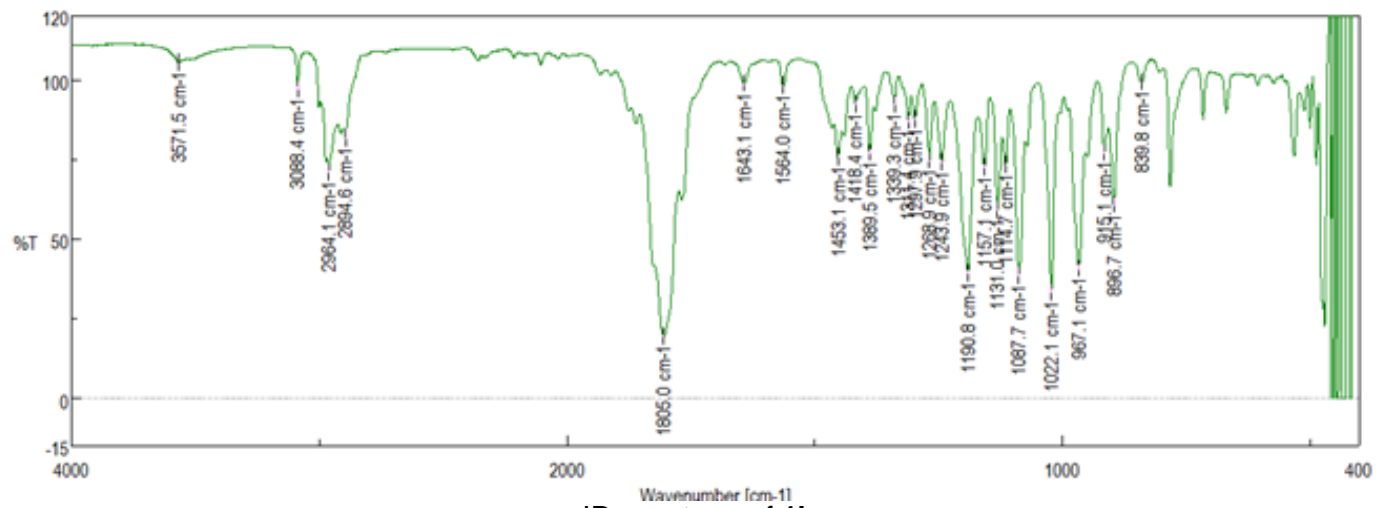

IR spectrum of **1b**

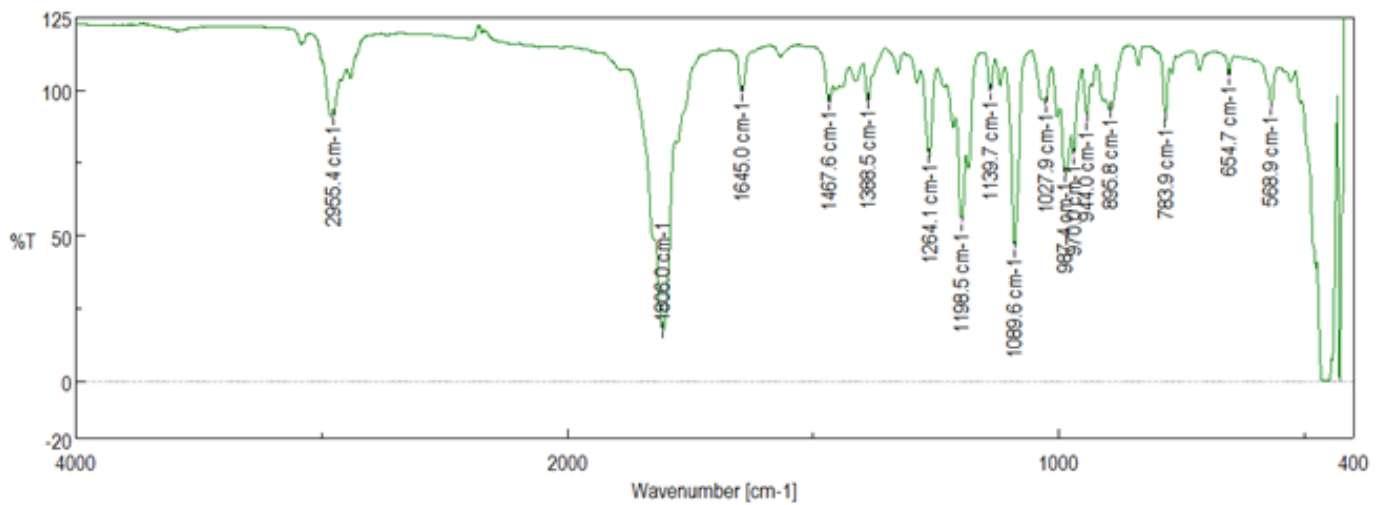

IR spectrum of **1c**



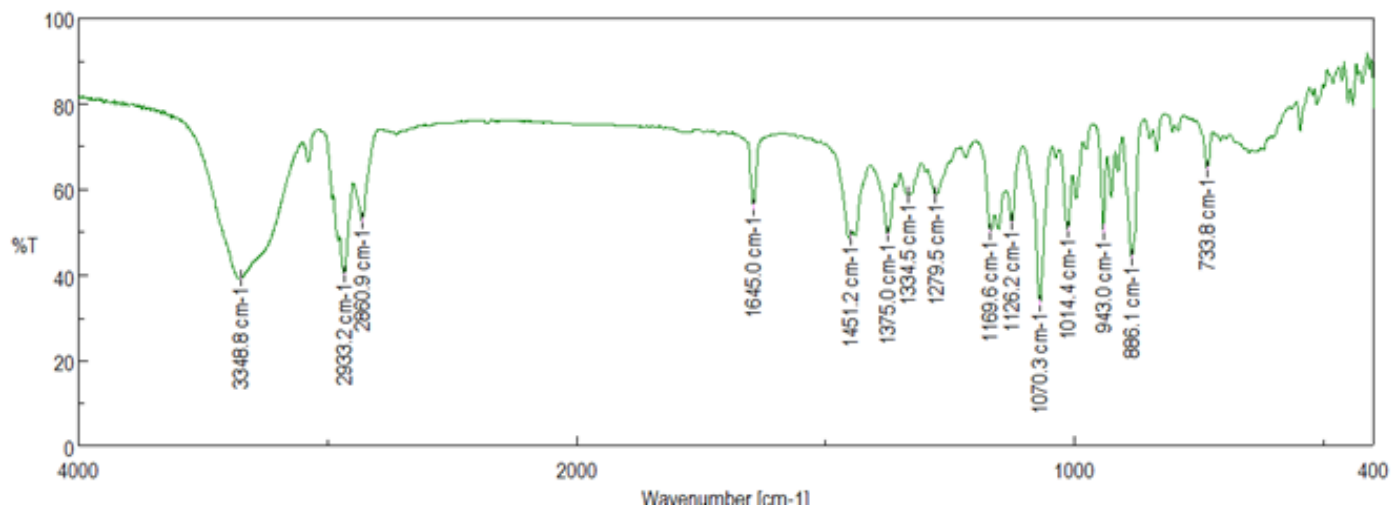

IR spectrum of 2a.

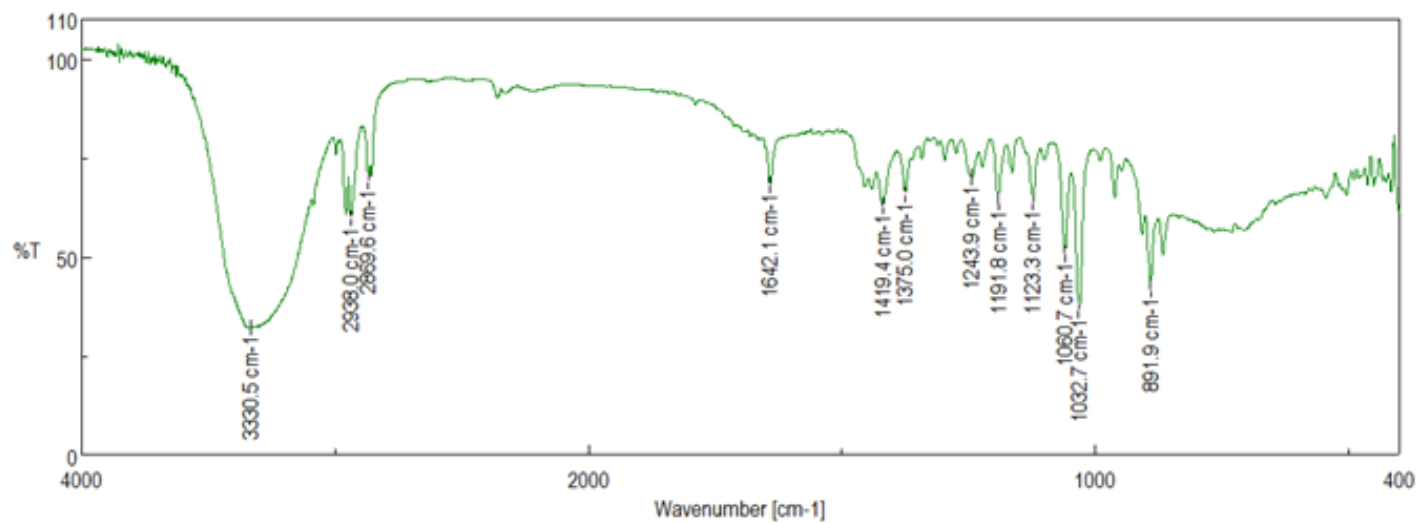

IR spectrum of 2b.

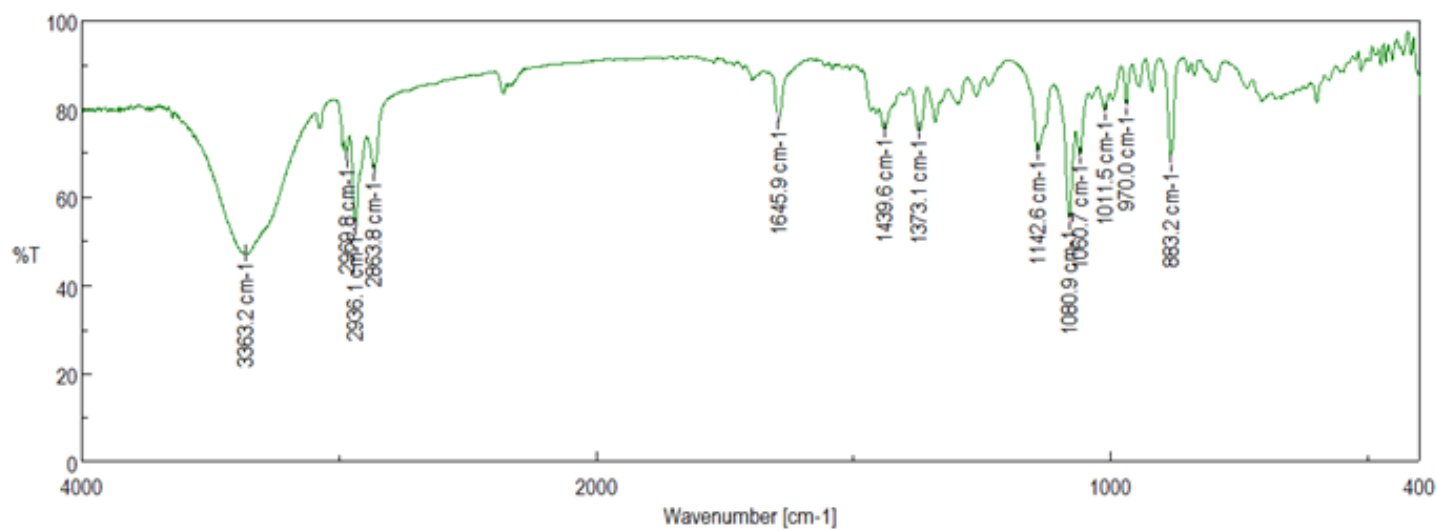

IR spectrum of **2c**.

IR spectra for **1a**, **1d**, and **2d** were reported in Supporting Information of ref.[2].

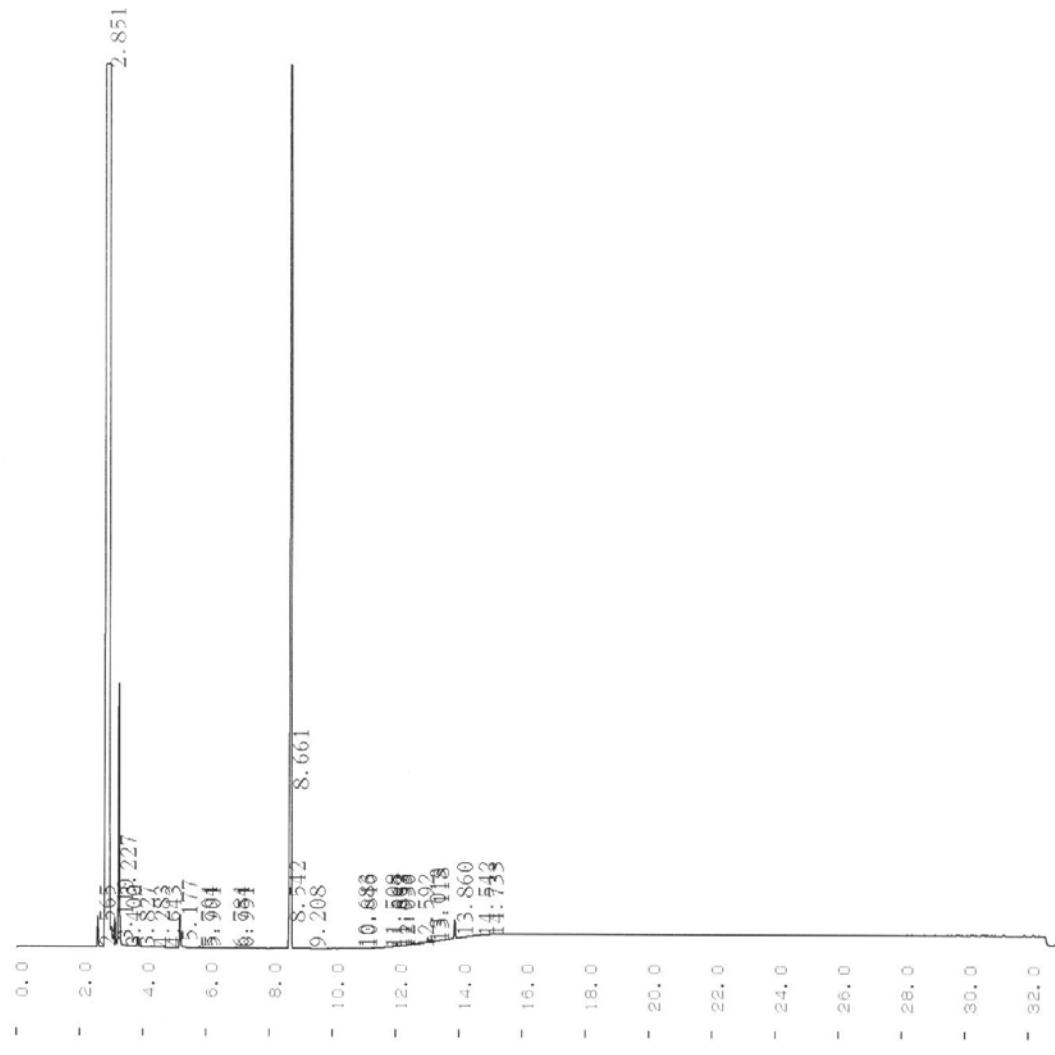

C-RSA CHROMATOPAC CH=1 Report No.=9 DATA=1:@CHRM1.C00 18/11/12 18:42:24

\*\* CALCULATION REPORT \*\*

| CH PKNO | TIME   | AREA      | HEIGHT    | MK | IDNO | CONC    | NAME |
|---------|--------|-----------|-----------|----|------|---------|------|
| 1       | 2.565  | 9257      | 4499      |    |      | 0.0026  |      |
| 2       | 2.851  | 356674816 | 101724392 | E  |      | 99.8037 |      |
| 3       | 3.11   | 15805     | 4193      | V  |      | 0.0044  |      |
| 4       | 3.227  | 85899     | 38222     | SV |      | 0.024   |      |
| 6       | 3.827  | 3244      | 1394      | T  |      | 0.0009  |      |
| 7       | 4.283  | 374       | 150       |    |      | 0.0001  |      |
| 8       | 4.643  | 109       | 36        |    |      | 0       |      |
| 9       | 5.177  | 11519     | 4638      |    |      | 0.0032  |      |
| 10      | 5.794  | 538       | 252       |    |      | 0.0002  |      |
| 11      | 5.901  | 434       | 181       |    |      | 0.0001  |      |
| 12      | 6.784  | 306       | 115       |    |      | 0.0001  |      |
| 13      | 6.951  | 598       | 236       | V  |      | 0.0002  |      |
| 14      | 8.542  | 491       | 86        |    |      | 0.0001  |      |
| 15      | 8.661  | 551748    | 197526    | V  |      | 0.1544  |      |
| 16      | 9.208  | 471       | 84        |    |      | 0.0001  |      |
| 18      | 10.846 | 121       | 44        |    |      | 0       |      |
| 19      | 11.508 | 189       | 28        |    |      | 0       |      |
| 20      | 11.667 | 176       | 29        |    |      | 0       |      |
| 22      | 11.953 | 291       | 92        |    |      | 0.0001  |      |
| 23      | 12.036 | 598       | 239       | V  |      | 0.0002  |      |
| 24      | 12.592 | 703       | 46        | V  |      | 0.0002  |      |
| 25      | 13.013 | 2756      | 782       |    |      | 0.0008  |      |
| 26      | 13.118 | 1497      | 481       | V  |      | 0.0004  |      |
| 27      | 13.86  | 10784     | 2914      | V  |      | 0.003   |      |
| 28      | 14.542 | 3583      | 60        | V  |      | 0.001   |      |
| 29      | 14.733 | 659       | 46        | V  |      | 0.0002  |      |

GC chart of compound **1a** as a typical sample.

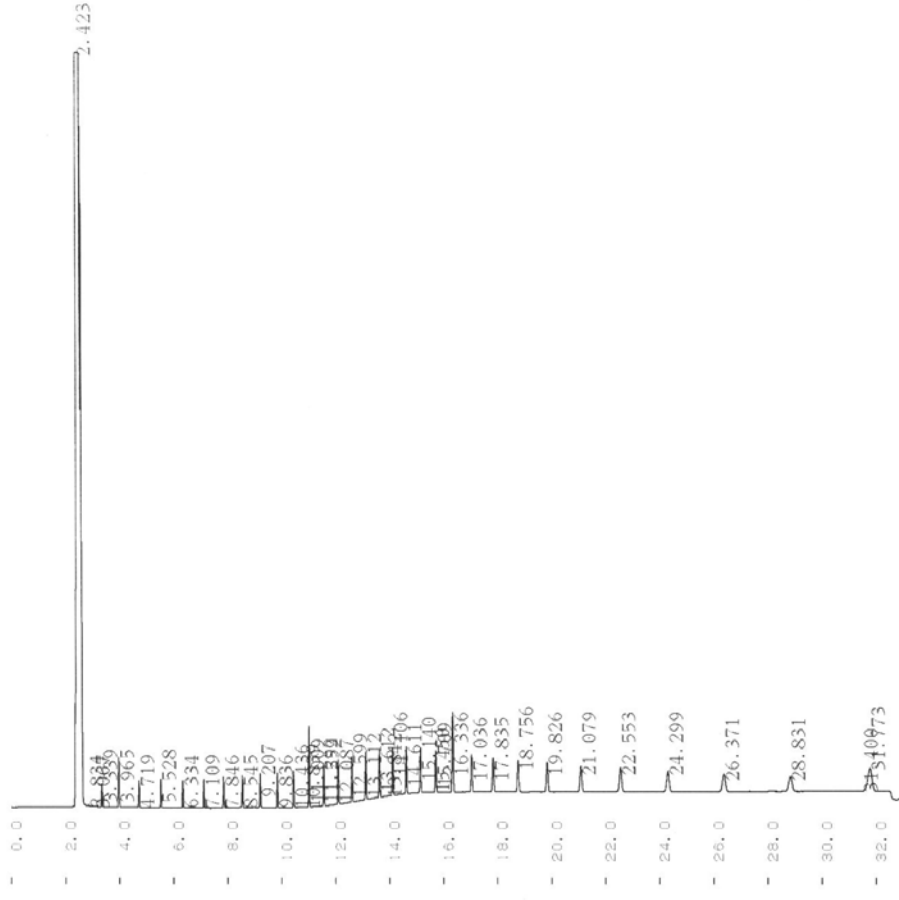

C-RSA CHROMATOPAC CH=1 Report No.=9 DATA=1:@CHRM1.C00 18/11/09 15:54:32

\*\* CALCULATION REPORT \*\*

| CH PKNO | TIME   | AREA      | HEIGHT   | MK | IDNO | CONC    | NAME      |          |
|---------|--------|-----------|----------|----|------|---------|-----------|----------|
| 1       | 2.423  | 128961008 | 46932592 | S  |      | 99.5101 |           |          |
| 2       | 2.834  | 495       | 227      | T  |      | 0.0004  |           |          |
| 4       | 3.339  | 8759      | 4020     |    |      | 0.0068  |           |          |
| 5       | 3.965  | 17913     | 8508     |    |      | 0.0138  |           |          |
| 6       | 4.719  | 9117      | 4585     |    |      | 0.007   |           |          |
| 7       | 5.528  | 9444      | 4906     |    |      | 0.0073  |           |          |
| 8       | 6.334  | 9436      | 4762     |    |      | 0.0077  |           |          |
| 9       | 7.109  | 9996      | 5013     |    |      | 0.0081  |           |          |
| 10      | 7.846  | 10521     | 5320     |    |      | 0.0092  |           |          |
| 11      | 8.545  | 11938     | 5529     |    |      | 0.0095  |           |          |
| 12      | 9.207  | 12248     | 5757     |    |      | 0.0097  |           |          |
| 13      | 9.836  | 12510     | 5988     |    |      | 0.0102  |           |          |
| 14      | 10.436 | 13197     | 6239     |    |      | 0.0003  |           |          |
| 15      | 10.839 | 325       | 90       |    |      | 0.0233  |           |          |
| 16      | 11.009 | 30139     | 13705    | V  |      | 0.0121  |           |          |
| 18      | 11.559 | 15622     | 7087     |    |      | 0.013   |           |          |
| 19      | 12.087 | 16855     | 7620     |    |      | 0.0146  |           |          |
| 20      | 12.599 | 18896     | 7709     |    |      | 0.017   |           |          |
| 21      | 13.112 | 22005     | 8200     | V  |      | 0.0192  |           |          |
| 22      | 13.612 | 24882     | 8259     | V  |      | 0.0019  |           |          |
| 23      | 13.842 | 2468      | 227      | V  |      | 0.0184  |           |          |
| 24      | 14.106 | 23788     | 8250     | V  |      | 0.0201  |           |          |
| 25      | 14.611 | 26094     | 8144     | V  |      | 0.0174  |           |          |
| 26      | 15.14  | 22563     | 7468     | V  |      | 0.0001  |           |          |
| 27      | 15.45  | 157       | 20       |    |      | 0.0155  |           |          |
| 28      | 15.709 | 20109     | 7049     | V  |      | 0.0314  |           |          |
| 29      | 16.336 | 40644     | 13597    |    |      | 0.016   |           |          |
| 30      | 17.036 | 20723     | 6327     |    |      | 0.0162  |           |          |
| 31      | 17.835 | 20962     | 5822     |    |      | 0.0165  |           |          |
| 32      | 18.756 | 21423     | 5458     |    |      | 0.0171  |           |          |
| 33      | 19.826 | 22156     | 4959     |    |      | 0.0171  |           |          |
| 34      | 21.079 | 22163     | 4421     |    |      | 0.0182  |           |          |
| 35      | 22.553 | 23596     | 4103     |    |      | 0.0177  |           |          |
| 36      | 24.299 | 22890     | 3411     |    |      | 0.0178  |           |          |
| 37      | 26.371 | 23022     | 2977     |    |      | 0.0176  |           |          |
| 38      | 28.831 | 22772     | 2452     |    |      | 0.0003  |           |          |
| 39      | 31.4   | 452       | 46       |    |      | 0.0345  |           |          |
| 40      | 31.773 | 44746     | 3970     | V  |      |         |           |          |
| TOTAL   |        |           |          |    |      |         | 129595776 | 47134752 |
|         |        |           |          |    |      |         |           | 100      |

GC chart of mixed hydrocarbon standards (C9 - C40).

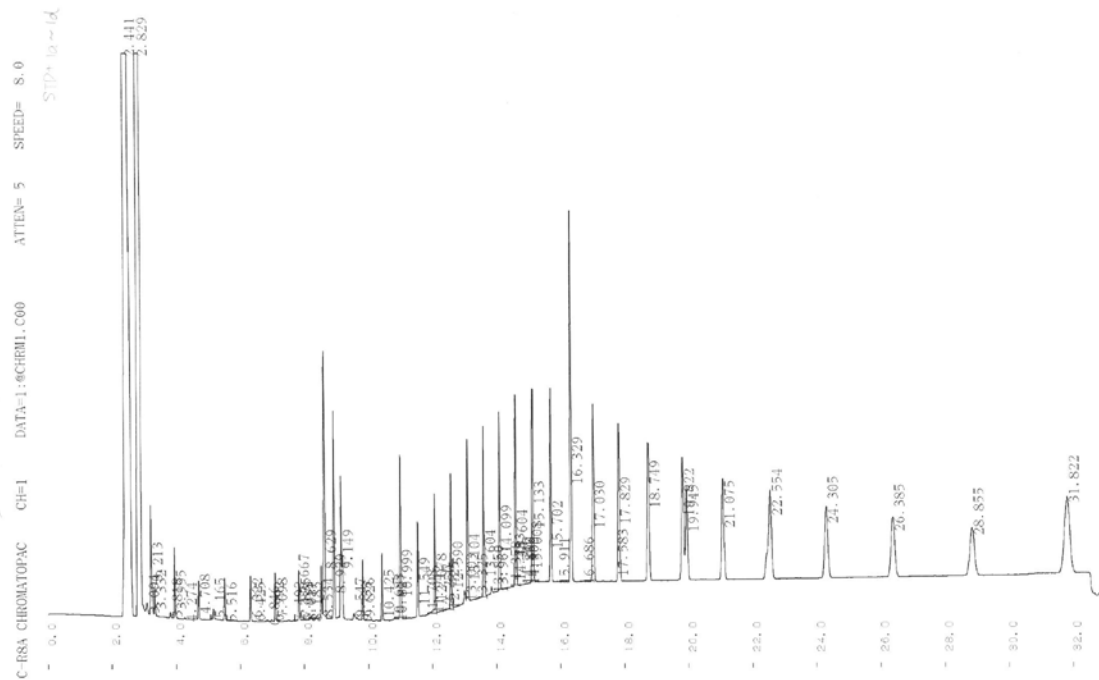

GC chart of a mixed solution of hydrocarbon standards (C9 - C40) and four carbonates, **1a-1d**.

**\*\* CALCULATION REPORT \*\***

| CH | PKNO | TIME   | AREA     | HEIGHT   | MK | IDNO | CONC    | NAME |
|----|------|--------|----------|----------|----|------|---------|------|
| 1  | 1    | 2.441  | 26859224 | 8218307  |    |      | 29.3974 |      |
|    | 2    | 2.829  | 63648556 | 25347168 | V  |      | 69.6634 |      |
|    | 3    | 3.094  | 3671     | 810      | V  |      | 0.004   |      |
|    | 4    | 3.213  | 16846    | 6376     | V  |      | 0.0184  |      |
|    | 5    | 3.332  | 4039     | 1725     | V  |      | 0.0044  |      |
|    | 6    | 3.818  | 899      | 344      |    |      | 0.001   |      |
|    | 7    | 3.955  | 8575     | 4081     |    |      | 0.0094  |      |
|    | 8    | 4.274  | 201      | 74       |    |      | 0.0002  |      |
|    | 9    | 4.708  | 4551     | 2201     |    |      | 0.005   |      |
|    | 10   | 5.165  | 1718     | 627      |    |      | 0.0019  |      |
|    | 11   | 5.516  | 4890     | 2406     |    |      | 0.0054  |      |
|    | 12   | 6.322  | 5059     | 2598     |    |      | 0.0055  |      |
|    | 14   | 6.846  | 247      | 98       |    |      | 0.0003  |      |
|    | 15   | 6.992  | 343      | 111      | V  |      | 0.0004  |      |
|    | 16   | 7.098  | 5648     | 2795     | V  |      | 0.0062  |      |
|    | 17   | 7.492  | 201      | 32       |    |      | 0.0002  |      |
|    | 19   | 7.835  | 5870     | 2895     | V  |      | 0.0064  |      |
|    | 21   | 8.011  | 178      | 71       | V  |      | 0.0002  |      |
|    | 22   | 8.185  | 335      | 93       |    |      | 0.0004  |      |
|    | 23   | 8.534  | 6332     | 3013     |    |      | 0.0069  |      |
|    | 24   | 8.629  | 43421    | 15306    | V  |      | 0.0475  |      |
|    | 25   | 8.929  | 28430    | 11938    | V  |      | 0.0311  |      |
|    | 26   | 9.149  | 27983    | 8221     | V  |      | 0.0306  |      |
|    | 27   | 9.547  | 1719     | 362      | S  |      | 0.0019  |      |
|    | 29   | 9.826  | 7453     | 3495     |    |      | 0.0082  |      |
|    | 30   | 10.425 | 8365     | 3858     |    |      | 0.0092  |      |
|    | 32   | 10.827 | 579      | 110      | V  |      | 0.0006  |      |
|    | 33   | 10.999 | 21013    | 9441     | V  |      | 0.023   |      |
|    | 34   | 11.549 | 12206    | 5467     |    |      | 0.0134  |      |
|    | 35   | 11.708 | 185      | 28       | V  |      | 0.0002  |      |
|    | 36   | 11.942 | 791      | 143      |    |      | 0.0009  |      |
|    | 37   | 12.078 | 15989    | 6818     | V  |      | 0.0175  |      |
|    | 38   | 12.25  | 252      | 45       | V  |      | 0.0003  |      |
|    | 39   | 12.425 | 283      | 55       |    |      | 0.0003  |      |
|    | 40   | 12.59  | 18113    | 7736     | V  |      | 0.0198  |      |
|    | 41   | 13.003 | 3358     | 785      | V  |      | 0.0037  |      |
|    | 42   | 13.104 | 22859    | 9385     | V  |      | 0.025   |      |
|    | 43   | 13.325 | 1233     | 129      | V  |      | 0.0013  |      |
|    | 44   | 13.604 | 25484    | 9841     | V  |      | 0.0279  |      |
|    | 45   | 13.85  | 2908     | 525      | V  |      | 0.0032  |      |
|    | 46   | 13.967 | 852      | 182      | V  |      | 0.0009  |      |
|    | 47   | 14.099 | 27446    | 10405    | V  |      | 0.03    |      |
|    | 48   | 14.358 | 2574     | 193      | V  |      | 0.0028  |      |
|    | 49   | 14.483 | 1326     | 175      | V  |      | 0.0015  |      |
|    | 50   | 14.604 | 29046    | 11104    | V  |      | 0.0318  |      |
|    | 51   | 14.717 | 598      | 135      | V  |      | 0.0007  |      |
|    | 52   | 14.8   | 457      | 106      | V  |      | 0.0005  |      |
|    | 53   | 14.9   | 607      | 89       | V  |      | 0.0007  |      |
|    | 54   | 15.008 | 372      | 68       | V  |      | 0.0004  |      |
|    | 55   | 15.133 | 30534    | 11128    | V  |      | 0.0334  |      |
|    | 56   | 15.702 | 30870    | 11096    |    |      | 0.0338  |      |
|    | 57   | 15.911 | 122      | 38       |    |      | 0.0001  |      |
|    | 58   | 16.329 | 64025    | 21231    |    |      | 0.0701  |      |
|    | 60   | 17.03  | 32603    | 10173    |    |      | 0.0357  |      |
|    | 62   | 17.829 | 32181    | 9041     |    |      | 0.0352  |      |
|    | 63   | 18.749 | 31673    | 7934     |    |      | 0.0347  |      |
|    | 64   | 19.822 | 31611    | 7037     |    |      | 0.0346  |      |
|    | 65   | 19.945 | 23926    | 5397     | V  |      | 0.0262  |      |
|    | 66   | 21.075 | 29731    | 5781     |    |      | 0.0325  |      |
|    | 67   | 22.554 | 38418    | 5130     |    |      | 0.042   |      |
|    | 68   | 24.305 | 28518    | 4112     |    |      | 0.0312  |      |
|    | 69   | 26.385 | 28093    | 3415     |    |      | 0.0307  |      |
|    | 70   | 28.855 | 27387    | 2745     |    |      | 0.03    |      |
|    | 71   | 31.822 | 53162    | 4376     |    |      | 0.0582  |      |

## References

1. Steiner, D.; Ivison, L.; Goralski, C. T.; Appell, R. B.; Gojkovic, J. R.; Singaram, B. *Tetrahedron: Asymmetry* **2002**, *13*, 2359–2363.  
doi:org/10.1016/S0957-4166(02)00646-8
2. Morikawa, H.; Minamoto, M.; Gorou, Y.; Yamaguchi, J.; Morinaga, H.; Motokucho, S. *Bull. Chem. Soc. Jpn.* **2018**, *91*, 92–94. doi:org/10.1246/bcsj.20170300  
doi:org/10.1007/s00289-015-1546-6
3. Kováts, E. *Helv. Chim. Acta.* **1958**, *41*, 1915–1932.  
doi:org/10.1002/hlca.19580410703
4. Martínez, J.; Fernández-Baeza, J.; Sánchez-Barba, L. F.; Castro-Osma, J. A.; Lara-Sánchez, A.; Otero, A. *ChemSusChem* **2017**, *10*, 2886–2890.  
doi:org/10.1002/cssc.201700898
5. Fiorani, G.; Stuck, M.; Martín, C.; Belmonte, M. M.; Martin, E.; Escudero-Adán, E. C.; Kleij, A. W. *ChemSusChem* **2016**, *9*, 1304–1311.  
doi:org/10.1002/cssc.201600238
6. Plummer, C. M.; Kraft, P.; Froese, J.; Hudlický, T.; Rook, T. J.; Jones, O. A. H.; Hügel, H. M. *Asian J. Org. Chem.* **2015**, *4*, 1075–1084.  
doi:org/10.1002/ajoc.201500233
7. Blair, M.; Andrews, P. C.; Fraser, B. H.; Forsyth, C. M.; Junk, P. C.; Massi, M.; Tuck, K. L. *Synthesis* **2007**, 1523–1527. doi:10.1055/s-2007-966033
8. Leung, A. E.; Rubbiani, R.; Gasser, G.; Tuck, K. L. *Org. Biomol. Chem.* **2014**, *12*, 8239–8246. doi:10.1039/C4OB01662A
